# Supplementary material for: A new class of third-order nonlinear optical materials: laser pulse-duration dependant saturable absorption and nonlinear refraction in platinum(ii) diimine-dithiolate complexes
Source: Royal Society of Chemistry journal article supplement (doi:10.1039/d3dt00931a), 2023-01-01
Supplement: d3dt00931a1.pdf [file d3dt00931a1.pdf]

## Supplementary Information

### **A new class of third-order nonlinear optical materials: pulse-duration dependent saturable/reverse-saturable absorption and nonlinear refraction in platinum(II) diimine-dithiolate complexes**

*Dedicated to the memory of Prof. G. C. Papavassiliou*

Anna Pintus,<sup>a\*</sup> Cristian Pilloni,<sup>a</sup> Gabriele Pippia,<sup>a</sup> Enrico Podda,<sup>a,b</sup> M. Carla Aragoni,<sup>a</sup> Vito Lippolis,<sup>a</sup> Panagiotis Aloukos,<sup>c,d</sup> Dionysios Potamianos,<sup>c,d,‡</sup> Nikolaos Chazapis,<sup>c,d</sup> Stelios Couris,<sup>c,d\*</sup> George C. Anyfantis,<sup>c</sup> Alexandra M. Z. Slawin,<sup>f</sup> J. Derek Woollins,<sup>f,g</sup> and Massimiliano Arca<sup>a\*</sup>

<sup>a</sup> Dipartimento di Scienze Chimiche e Geologiche, Università degli Studi di Cagliari, S. S. 554 Bivio per Sestu, 09042 Monserrato, CA, Italy

<sup>b</sup> Centro Servizi di Ateneo per la Ricerca (CeSAR), Università degli Studi di Cagliari, S.S. 554 bivio per Sestu, 09042 Monserrato, CA, Italy

<sup>c</sup> Institute of Chemical Engineering Sciences (ICE-HT), Foundation for Research and Technology-Hellas (FORTH), P.O. Box 1414, 26504 Patras, Greece.

<sup>d</sup> Department of Physics, University of Patras, 26504 Patras, Greece

<sup>e</sup> NanoPhos S.A., PO Box 519, Science and Technology Park of Lavrio, 1st km of Lavrio –Athens Ave., Lavrio 19500, Attica, Greece

<sup>f</sup> EaStCHEM School of Chemistry, University of St. Andrews, North Haugh, St. Andrews, Fife, UK, KY16 9ST

<sup>g</sup> Department of Chemistry, Khalifa University, Abu Dhabi 127788, United Arab Emirates.

<sup>‡</sup> Present address: Ludwig-Maximilians-Universität München, Am Coulombwall 1, 85748 Garching, Germany.

## Contents

|                              |    |
|------------------------------|----|
| 1. Tables.....               | 2  |
| 2. Schemes and Figures ..... | 50 |
| 3. References .....          | 62 |

## 1. Tables

**Table S1.** Crystal data for complexes **1** and **5**.

|                                          | <b>1</b>                                                        | <b>5</b>                                                        |
|------------------------------------------|-----------------------------------------------------------------|-----------------------------------------------------------------|
| Empirical formula                        | C <sub>14</sub> H <sub>12</sub> N <sub>2</sub> PtS <sub>4</sub> | C <sub>16</sub> H <sub>16</sub> N <sub>2</sub> PtS <sub>4</sub> |
| Calculated density (g cm <sup>-3</sup> ) | 2.360                                                           | 2.136                                                           |
| Formula Weight                           | 531.59                                                          | 559.64                                                          |
| $\mu$ (mm <sup>-1</sup> )                | 9.929                                                           | 8.540                                                           |
| Crystal size (mm <sup>3</sup> )          | 0.21×0.06×0.02                                                  | 0.30×0.08×0.02                                                  |
| <i>T</i> (K)                             | 125(2)                                                          | 298(2)                                                          |
| Crystal System                           | Orthorhombic                                                    | Monoclinic                                                      |
| Space Group                              | <i>Pnma</i>                                                     | <i>P2<sub>1</sub>/c</i>                                         |
| <i>a</i> (Å)                             | 7.8675(17)                                                      | 10.451(5)                                                       |
| <i>b</i> (Å)                             | 14.825(4)                                                       | 21.309(9)                                                       |
| <i>c</i> (Å)                             | 12.827(3)                                                       | 8.335(4)                                                        |
| $\alpha$ (°)                             | 90                                                              | 90                                                              |
| $\beta$ (°)                              | 90                                                              | 110.331(16)                                                     |
| $\gamma$ (°)                             | 90                                                              | 90                                                              |
| <i>V</i> (Å <sup>3</sup> )               | 1496.1(6)                                                       | 1740.5(14)                                                      |
| <i>Z</i>                                 | 4                                                               | 4                                                               |
| <i>Z'</i>                                | 0.5                                                             | 1                                                               |
| Wavelength (Å)                           | 0.71075                                                         | 0.71073                                                         |
| Radiation type                           | Mo <i>K</i> $\alpha$                                            | Mo <i>K</i> $\alpha$                                            |
| Total number of data                     | 8678                                                            | 37262                                                           |
| Unique reflections                       | 1338                                                            | 3985                                                            |
| <i>R</i> <sub>int</sub>                  | 0.0409                                                          | 0.0542                                                          |
| Parameters                               | 107                                                             | 210                                                             |
| Restraints                               | 0                                                               | 0                                                               |
| <i>wR</i> <sub>2</sub> (all data)        | 0.0657                                                          | 0.0554                                                          |
| <i>R</i> <sub><i>I</i></sub>             | 0.0251                                                          | 0.0238                                                          |
| Goof                                     | 1.131                                                           | 1.103                                                           |

**Table S2.** Selected bond lengths (Å), angles, and dihedral angles (°) for complexes **1** and **5**. Atom labelling scheme as in Figures 1 and S1.

|                                         | <b>1</b>   |               | <b>5</b>   |
|-----------------------------------------|------------|---------------|------------|
| Pt1-S1                                  | 2.2476(12) | Pt1-S1        | 2.2573(14) |
|                                         |            | Pt1-S2        | 2.2509(13) |
| Pt1-N1                                  | 2.052(4)   | Pt1-N1        | 2.068(4)   |
|                                         |            | Pt1-N2        | 2.052(4)   |
| S1-C6                                   | 1.761(5)   | S1-C13        | 1.751(5)   |
|                                         |            | S2-C14        | 1.746(5)   |
| C6-S2                                   | 1.765(5)   | C13-S3        | 1.755(5)   |
|                                         |            | C14-S4        | 1.761(5)   |
| S2-C7                                   | 1.816(13)  | S3-C15        | 1.815(6)   |
| S2-C7A                                  | 1.805(12)  | S4-C16        | 1.792(5)   |
| C6-C6 <sup>i</sup>                      | 1.337(8)   | C13-C14       | 1.345(6)   |
| C7-C7A                                  | 1.52(2)    | C15-C16       | 1.506(8)   |
| N1-C5                                   | 1.348(6)   | N1-C6         | 1.358(5)   |
|                                         |            | N3-C7         | 1.354(6)   |
| C5-C5 <sup>i</sup>                      | 1.474(6)   | C6-C7         | 1.471(6)   |
| N1-Pt1-N1 <sup>i</sup>                  | 79.0(2)    | N1-Pt1-N2     | 79.11(14)  |
| N1-Pt1-S1                               | 95.98(11)  | N1-Pt1-S1     | 96.68(10)  |
|                                         |            | N2-Pt1-S2     | 95.44(11)  |
| S2-Pt1-S2 <sup>i</sup>                  | 88.93(6)   | S1-Pt1-S2     | 88.88(5)   |
| N1-Pt1-S1-C6                            | 175.60(3)  | N1-Pt1-S1-C13 | 171.67(4)  |
|                                         |            | N2-Pt1-S2-C14 | 175.65(4)  |
| S1-C6-S2-C7                             | 157.9(7)   | S1-C13-S3-C15 | 149.41(5)  |
| S1-C6-S2-C7A                            | 175.2(8)   | S2-C14-S4-C16 | 134.15(4)  |
| C6-S2-S2 <sup>i</sup> -C7 <sup>i</sup>  | 155.27(7)  | C13-S3-S4-C16 | 123.74(3)  |
| C6-S2-S2 <sup>i</sup> -C7A <sup>i</sup> | 171.10(8)  | C14-S4-S3-C15 | 142.52(5)  |

Symmetry codes: <sup>i</sup> =  $x, 3/2-y, z$

**Table S3.** Electrochemical data (V vs Fc<sup>+</sup>/Fc) recorded by cyclic voltammetry in DMSO for complexes **1–6**; scan rate 100 mV·s<sup>-1</sup>).

|          | $E_{1/2}^{(0/-1)}$ |                 |           | $E_{1/2}^{(+1/0)}$ |                 |           |
|----------|--------------------|-----------------|-----------|--------------------|-----------------|-----------|
|          | $ E_{pc}-E_{pa} $  | $i_{pc}/i_{pa}$ | $E_{1/2}$ | $ E_{pc}-E_{pa} $  | $i_{pc}/i_{pa}$ | $E_{1/2}$ |
| <b>1</b> | 0.101              | 0.82            | -1.728    | 0.081              | 1.34            | -0.177    |
| <b>2</b> | 0.120              | 0.78            | -1.678    | 0.112              | 0.86            | -0.112    |
| <b>3</b> | 0.078              | 0.91            | -1.676    | 0.132              | 0.79            | -0.192    |
| <b>4</b> | 0.083              | 0.85            | -1.683    | 0.128              | 1.35            | -0.072    |
| <b>5</b> | 0.126              | 1.35            | -1.778    | 0.085              | 0.84            | -0.182    |
| <b>6</b> | 0.082              | 1.32            | -1.819    | 0.083              | 0.79            | -0.178    |

**Table S4.** UV-Vis absorption maxima  $\lambda_{\text{max}}$  (nm) of the solvatochromic absorption band and corresponding molar extinction coefficients  $\epsilon$  ( $\text{M}^{-1}\cdot\text{cm}^{-1}$ ) recorded in DMSO and DMF for complexes **1–6**.

|          | DMSO                   |            | DMF                    |            |
|----------|------------------------|------------|------------------------|------------|
|          | $\lambda_{\text{max}}$ | $\epsilon$ | $\lambda_{\text{max}}$ | $\epsilon$ |
| <b>1</b> | 615                    | 4400       | 623                    | 4500       |
| <b>2</b> | 580                    | 4100       | 593                    | 4200       |
| <b>3</b> | 611                    | 4500       | 626                    | 4600       |
| <b>4</b> | 588                    | 5600       | 598                    | 6700       |
| <b>5</b> | 593                    | 4200       | 605                    | 4300       |
| <b>6</b> | 595                    | 5200       | 602                    | 5300       |

**Table S5.** UV-Vis absorption maxima  $\lambda_{\text{max}}$  (nm) of the solvatochromic absorption band recorded in different solvents for complexes **1–6**.

|                                 | <b>1</b> | <b>2</b> | <b>3</b> | <b>4</b> | <b>5</b> | <b>6</b> |
|---------------------------------|----------|----------|----------|----------|----------|----------|
| CH <sub>3</sub> CN              | 604      | 577      | 601      | 581      | 589      | 584      |
| DMSO                            | 615      | 580      | 611      | 588      | 593      | 595      |
| Acetone                         | 639      | 603      | 633      | 610      | 614      | 617      |
| DMF                             | 623      | 593      | 626      | 598      | 605      | 602      |
| CH <sub>2</sub> Cl <sub>2</sub> | 645      | 613      | 642      | 614      | 620      | 616      |
| CHCl <sub>3</sub>               | 667      | 636      | 656      | 634      | 641      | 641      |
| THF                             | 686      | 648      | 682      | 654      | 657      | 664      |
| Toluene <sup>a</sup>            | –        | 672, 714 | –        | 645, 697 | –        | 703, 750 |

<sup>a</sup> Spectra could not be recorded in toluene for some complexes due to solubility reasons.

**Table S6.** Selected experimental bond lengths (Å) and angles (°), corresponding optimised parameters obtained with different functionals and basis sets,<sup>a</sup> for complex **1**; numbering scheme as in Figure S5.

|         | Structural data | mPW1PW    |        |           | PBE0      |        |           | B3LYP     |        |           |
|---------|-----------------|-----------|--------|-----------|-----------|--------|-----------|-----------|--------|-----------|
|         |                 | LANL08(f) | CRENBL | Stuttgart | LANL08(f) | CRENBL | Stuttgart | LANL08(f) | CRENBL | Stuttgart |
| Pt1-S1  | 2.248           | 2.265     | 2.271  | 2.278     | 2.262     | 2.269  | 2.275     | 2.290     | 2.296  | 2.302     |
| Pt1-S2  | 2.248           | 2.263     | 2.270  | 2.276     | 2.261     | 2.267  | 2.274     | 2.288     | 2.294  | 2.300     |
| Pt1-N1  | 2.051           | 2.039     | 2.049  | 2.061     | 2.036     | 2.046  | 2.058     | 2.066     | 2.074  | 2.087     |
| Pt1-N2  | 2.051           | 2.039     | 2.049  | 2.061     | 2.037     | 2.046  | 2.058     | 2.065     | 2.074  | 2.087     |
| C13-S1  | 1.761           | 1.746     | 1.749  | 1.748     | 1.745     | 1.747  | 1.747     | 1.760     | 1.762  | 1.762     |
| C12-S2  | 1.761           | 1.744     | 1.747  | 1.746     | 1.743     | 1.745  | 1.745     | 1.757     | 1.760  | 1.759     |
| C13-S3  | 1.765           | 1.759     | 1.759  | 1.759     | 1.758     | 1.758  | 1.758     | 1.773     | 1.774  | 1.773     |
| C14-S4  | 1.765           | 1.759     | 1.760  | 1.759     | 1.758     | 1.758  | 1.758     | 1.772     | 1.773  | 1.772     |
| C11-C12 | 1.337           | 1.361     | 1.360  | 1.360     | 1.362     | 1.361  | 1.361     | 1.364     | 1.363  | 1.363     |
| C13-C14 | 1.516           | 1.514     | 1.515  | 1.515     | 1.514     | 1.514  | 1.514     | 1.521     | 1.521  | 1.521     |
| C5-C6   | 1.474           | 1.457     | 1.459  | 1.465     | 1.457     | 1.458  | 1.461     | 1.462     | 1.463  | 1.465     |
| C5-N1   | 1.348           | 1.361     | 1.361  | 1.359     | 1.361     | 1.361  | 1.359     | 1.368     | 1.368  | 1.366     |
| C6-N2   | 1.348           | 1.361     | 1.361  | 1.359     | 1.361     | 1.361  | 1.359     | 1.368     | 1.368  | 1.366     |

<sup>a</sup> In all cases, the cc-pVDZ basis set was used for C, H, N, and S.

**Table S7.** Optimised geometry calculated for complex **1** at DFT level [PBE0//cc-pVDZ/LANL08(f)] in the gas phase (total charge = 0, spin multiplicity = 1) in orthogonal Cartesian coordinate format ( $Z$  = atomic number).

| Atom number | $Z$ | $x$       | $y$       | $z$       |
|-------------|-----|-----------|-----------|-----------|
| 1           | 78  | 0.006132  | -0.017813 | 0.006005  |
| 2           | 16  | -0.004662 | -0.025781 | 2.265468  |
| 3           | 6   | 1.688402  | -0.050368 | 2.708821  |
| 4           | 16  | 2.083445  | -0.084353 | 4.426760  |
| 5           | 6   | 3.243329  | 1.327851  | 4.378998  |
| 6           | 6   | 4.550208  | 1.002615  | 3.686146  |
| 7           | 16  | 4.387480  | 0.034343  | 2.124853  |
| 8           | 6   | 2.661223  | 0.081650  | 1.769217  |
| 9           | 16  | 2.247320  | 0.270522  | 0.076819  |
| 10          | 1   | 2.718311  | 2.155784  | 3.880699  |
| 11          | 1   | 3.436446  | 1.617418  | 5.424118  |
| 12          | 1   | 5.185534  | 0.380166  | 4.333297  |
| 13          | 1   | 5.090853  | 1.934770  | 3.453563  |
| 14          | 7   | -0.151818 | 0.000928  | -2.028096 |
| 15          | 6   | 0.874755  | 0.106629  | -2.895678 |
| 16          | 6   | 0.695144  | 0.131833  | -4.265621 |
| 17          | 6   | -0.600349 | 0.040930  | -4.782957 |
| 18          | 6   | -1.659390 | -0.074869 | -3.899884 |
| 19          | 6   | -1.418345 | -0.095727 | -2.521576 |
| 20          | 6   | -2.458671 | -0.234380 | -1.511056 |
| 21          | 7   | -2.008005 | -0.246986 | -0.225191 |
| 22          | 6   | -2.901572 | -0.397901 | 0.772906  |
| 23          | 6   | -4.258502 | -0.529741 | 0.546728  |
| 24          | 6   | -4.733176 | -0.510172 | -0.767958 |
| 25          | 6   | -3.822136 | -0.362653 | -1.798991 |
| 26          | 1   | 1.868128  | 0.169373  | -2.448552 |
| 27          | 1   | 1.565073  | 0.221160  | -4.916320 |
| 28          | 1   | -0.776629 | 0.057846  | -5.859280 |
| 29          | 1   | -2.679734 | -0.151743 | -4.273439 |
| 30          | 1   | -4.161879 | -0.347911 | -2.833834 |
| 31          | 1   | -5.798182 | -0.611444 | -0.980929 |
| 32          | 1   | -4.932178 | -0.646944 | 1.395596  |
| 33          | 1   | -2.486416 | -0.412545 | 1.781884  |



**Table S8.** Optimised geometry calculated for complex **1** at DFT level [PBE0//cc-pVDZ/LANL08(f)] in DMSO (SCRF IEF-PCM; total charge = 0, spin multiplicity = 1) in orthogonal Cartesian coordinate format ( $Z$  = atomic number).

| Atom number | $Z$ | $x$       | $y$       | $z$       |
|-------------|-----|-----------|-----------|-----------|
| 1           | 78  | 0.006685  | -0.018752 | -0.003146 |
| 2           | 16  | 0.008325  | -0.098195 | 2.271002  |
| 3           | 6   | 1.715287  | -0.066681 | 2.702541  |
| 4           | 16  | 2.119881  | -0.130284 | 4.421059  |
| 5           | 6   | 3.256442  | 1.302929  | 4.420749  |
| 6           | 6   | 4.565692  | 1.023696  | 3.716899  |
| 7           | 16  | 4.410026  | 0.128111  | 2.108989  |
| 8           | 6   | 2.676208  | 0.118314  | 1.764699  |
| 9           | 16  | 2.255094  | 0.328750  | 0.066035  |
| 10          | 1   | 2.715902  | 2.139949  | 3.956395  |
| 11          | 1   | 3.448885  | 1.553983  | 5.474939  |
| 12          | 1   | 5.210745  | 0.382247  | 4.333718  |
| 13          | 1   | 5.093544  | 1.970322  | 3.522345  |
| 14          | 7   | -0.156236 | 0.012894  | -2.047745 |
| 15          | 6   | 0.865148  | 0.124280  | -2.915195 |
| 16          | 6   | 0.681450  | 0.124206  | -4.288137 |
| 17          | 6   | -0.610029 | -0.000681 | -4.795199 |
| 18          | 6   | -1.668055 | -0.119481 | -3.905459 |
| 19          | 6   | -1.419835 | -0.109449 | -2.532521 |
| 20          | 6   | -2.464713 | -0.241407 | -1.514252 |
| 21          | 7   | -2.018383 | -0.256410 | -0.230826 |
| 22          | 6   | -2.910218 | -0.389464 | 0.766571  |
| 23          | 6   | -4.271759 | -0.505156 | 0.539487  |
| 24          | 6   | -4.740349 | -0.482035 | -0.772218 |
| 25          | 6   | -3.824814 | -0.349695 | -1.806342 |
| 26          | 1   | 1.860548  | 0.211142  | -2.478947 |
| 27          | 1   | 1.547037  | 0.218000  | -4.943288 |
| 28          | 1   | -0.791663 | -0.008814 | -5.870281 |
| 29          | 1   | -2.685572 | -0.225105 | -4.277346 |
| 30          | 1   | -4.167015 | -0.327501 | -2.839485 |
| 31          | 1   | -5.805831 | -0.565987 | -0.988056 |
| 32          | 1   | -4.948269 | -0.609223 | 1.387279  |
| 33          | 1   | -2.504017 | -0.402017 | 1.778256  |

**Table S9.** Optimised geometry calculated for complex **1** at DFT level [PBE0//cc-pVDZ/LANL08(f)] in DMF (SCRF IEF-PCM; total charge = 0, spin multiplicity = 1) in orthogonal Cartesian coordinate format ( $Z$  = atomic number).

| Atom number | $Z$ | $x$ | $y$       | $z$       |
|-------------|-----|-----|-----------|-----------|
| 1           | 1   | 78  | 0.006622  | -0.019008 |
| 2           | 2   | 16  | 0.007828  | -0.096462 |
| 3           | 3   | 6   | 1.714648  | -0.066348 |
| 4           | 4   | 16  | 2.119045  | -0.128560 |
| 5           | 5   | 6   | 3.256467  | 1.303965  |
| 6           | 6   | 6   | 4.565631  | 1.023210  |
| 7           | 7   | 16  | 4.409577  | 0.124952  |
| 8           | 8   | 6   | 2.675891  | 0.116953  |
| 9           | 9   | 16  | 2.255140  | 0.326769  |
| 10          | 10  | 1   | 2.716431  | 2.140709  |
| 11          | 11  | 1   | 3.448934  | 1.556215  |
| 12          | 12  | 1   | 5.210495  | 0.382507  |
| 13          | 13  | 1   | 5.093776  | 1.969387  |
| 14          | 14  | 7   | -0.156143 | 0.012430  |
| 15          | 15  | 6   | 0.865345  | 0.123774  |
| 16          | 16  | 6   | 0.681733  | 0.124535  |
| 17          | 17  | 6   | -0.609792 | 0.000590  |
| 18          | 18  | 6   | -1.667895 | -0.118241 |
| 19          | 19  | 6   | -1.419769 | -0.109131 |
| 20          | 20  | 6   | -2.464696 | -0.241290 |
| 21          | 21  | 7   | -2.018402 | -0.256359 |
| 22          | 22  | 6   | -2.910260 | -0.389909 |
| 23          | 23  | 6   | -4.271738 | -0.505967 |
| 24          | 24  | 6   | -4.740318 | -0.482748 |
| 25          | 25  | 6   | -3.824789 | -0.349941 |
| 26          | 26  | 1   | 1.860734  | 0.209940  |
| 27          | 27  | 1   | 1.547415  | 0.218291  |
| 28          | 28  | 1   | -0.791356 | -0.006776 |
| 29          | 29  | 1   | -2.685456 | -0.223098 |
| 30          | 30  | 1   | -4.166948 | -0.327765 |
| 31          | 31  | 1   | -5.805770 | -0.567054 |
| 32          | 32  | 1   | -4.948237 | -0.610458 |
| 33          | 33  | 1   | -2.504002 | -0.402626 |

**Table S10.** Optimised geometry calculated for complex **2** at DFT level [PBE0//cc-pVDZ/LANL08(f)] in the gas phase (total charge = 0, spin multiplicity = 1) in orthogonal Cartesian coordinate format ( $Z$  = atomic number).

| Atom number | $Z$ | $x$       | $y$       | $z$       |
|-------------|-----|-----------|-----------|-----------|
| 1           | 78  | -0.019550 | -0.000046 | 0.033888  |
| 2           | 7   | -0.031083 | 0.001823  | 2.078740  |
| 3           | 6   | 1.060538  | 0.007577  | 2.869110  |
| 4           | 6   | 0.983460  | -0.003243 | 4.249135  |
| 5           | 6   | -0.273990 | -0.018336 | 4.858798  |
| 6           | 6   | -1.400361 | -0.019132 | 4.054445  |
| 7           | 6   | -1.261657 | -0.007200 | 2.662201  |
| 8           | 6   | -2.381525 | 0.008578  | 1.728564  |
| 9           | 6   | -3.726178 | 0.013650  | 2.115393  |
| 10          | 6   | -4.719729 | 0.044321  | 1.152283  |
| 11          | 6   | -4.345868 | 0.071863  | -0.194029 |
| 12          | 6   | -3.002196 | 0.064828  | -0.518071 |
| 13          | 7   | -2.028701 | 0.029961  | 0.413331  |
| 14          | 1   | 2.020591  | 0.023177  | 2.350462  |
| 15          | 1   | 1.902462  | 0.000817  | 4.835344  |
| 16          | 1   | -0.370066 | -0.027241 | 5.945332  |
| 17          | 1   | -2.393693 | -0.027506 | 4.501368  |
| 18          | 1   | -3.987298 | -0.005032 | 3.172741  |
| 19          | 1   | -5.771288 | 0.048886  | 1.442241  |
| 20          | 1   | -5.087585 | 0.099329  | -0.992353 |
| 21          | 1   | -2.664293 | 0.089203  | -1.555454 |
| 22          | 16  | -0.186956 | -0.020728 | -2.215842 |
| 23          | 6   | 1.458954  | 0.105915  | -2.800240 |
| 24          | 16  | 1.619287  | 0.273314  | -4.551169 |
| 25          | 6   | 2.490869  | -1.265210 | -5.011461 |
| 26          | 6   | 3.999197  | -1.264379 | -4.807800 |
| 27          | 6   | 4.470601  | -1.293198 | -3.360914 |
| 28          | 16  | 4.200200  | 0.236830  | -2.399417 |
| 29          | 6   | 2.504065  | 0.091142  | -1.928907 |
| 30          | 16  | 2.222972  | -0.054784 | -0.206623 |
| 31          | 1   | 2.006660  | -2.098074 | -4.477175 |
| 32          | 1   | 2.261875  | -1.383247 | -6.082677 |
| 33          | 1   | 4.404070  | -2.164131 | -5.308676 |
| 34          | 1   | 5.563409  | -1.429928 | -3.330113 |
| 35          | 1   | 4.018228  | -2.126510 | -2.800082 |
| 36          | 1   | 4.436977  | -0.390528 | -5.318072 |

**Table S11.** Optimised geometry calculated for complex **2** at DFT level [PBE0//cc-pVDZ/LANL08(f)] in DMSO (SCRF IEF-PCM; total charge = 0, spin multiplicity = 1) in orthogonal Cartesian coordinate format ( $Z$  = atomic number).

| Atom number | $Z$ | $x$       | $y$       | $z$       |
|-------------|-----|-----------|-----------|-----------|
| 1           | 78  | -0.023531 | 0.011099  | 0.039037  |
| 2           | 7   | -0.033174 | -0.002794 | 2.092862  |
| 3           | 6   | 1.055281  | -0.011110 | 2.882017  |
| 4           | 6   | 0.974740  | -0.017190 | 4.264871  |
| 5           | 6   | -0.281851 | -0.013859 | 4.866247  |
| 6           | 6   | -1.409299 | -0.004630 | 4.057548  |
| 7           | 6   | -1.263249 | 0.001088  | 2.669881  |
| 8           | 6   | -2.388589 | 0.016802  | 1.731612  |
| 9           | 6   | -3.727328 | 0.027722  | 2.124857  |
| 10          | 6   | -4.725496 | 0.048240  | 1.161291  |
| 11          | 6   | -4.359844 | 0.057444  | -0.182918 |
| 12          | 6   | -3.014061 | 0.045848  | -0.510858 |
| 13          | 7   | -2.042139 | 0.025289  | 0.417858  |
| 14          | 1   | 2.019592  | -0.010903 | 2.373066  |
| 15          | 1   | 1.891300  | -0.023655 | 4.854066  |
| 16          | 1   | -0.383538 | -0.017597 | 5.951854  |
| 17          | 1   | -2.401843 | -0.000658 | 4.504436  |
| 18          | 1   | -3.988465 | 0.021425  | 3.181567  |
| 19          | 1   | -5.775073 | 0.057739  | 1.456581  |
| 20          | 1   | -5.104170 | 0.074250  | -0.978513 |
| 21          | 1   | -2.686737 | 0.055031  | -1.550907 |
| 22          | 16  | -0.191505 | 0.015210  | -2.225685 |
| 23          | 6   | 1.466932  | 0.120389  | -2.807223 |
| 24          | 16  | 1.632145  | 0.270420  | -4.563022 |
| 25          | 6   | 2.505428  | -1.268584 | -5.028756 |
| 26          | 6   | 4.011960  | -1.268679 | -4.823365 |
| 27          | 6   | 4.484672  | -1.297357 | -3.378531 |
| 28          | 16  | 4.209896  | 0.232945  | -2.413785 |
| 29          | 6   | 2.510048  | 0.105222  | -1.937511 |
| 30          | 16  | 2.234247  | -0.020028 | -0.203178 |
| 31          | 1   | 2.019287  | -2.101758 | -4.497698 |
| 32          | 1   | 2.276236  | -1.379537 | -6.099887 |
| 33          | 1   | 4.410953  | -2.173090 | -5.317678 |
| 34          | 1   | 5.577488  | -1.427531 | -3.347417 |
| 35          | 1   | 4.035395  | -2.131067 | -2.816736 |
| 36          | 1   | 4.456695  | -0.403375 | -5.341683 |

**Table S12.** Optimised geometry calculated for complex **2** at DFT level [PBE0//cc-pVDZ/LANL08(f)] in DMF (SCRF IEF-PCM; total charge = 0, spin multiplicity = 1) in orthogonal Cartesian coordinate format ( $Z$  = atomic number).

| Atom number | $Z$ | $x$       | $y$       | $z$       |
|-------------|-----|-----------|-----------|-----------|
| 1           | 78  | -0.023493 | 0.010921  | 0.038973  |
| 2           | 7   | -0.033193 | -0.002774 | 2.092763  |
| 3           | 6   | 1.055299  | -0.010904 | 2.881896  |
| 4           | 6   | 0.974823  | -0.017011 | 4.264736  |
| 5           | 6   | -0.281751 | -0.013901 | 4.866203  |
| 6           | 6   | -1.409212 | -0.004813 | 4.057559  |
| 7           | 6   | -1.263246 | 0.000966  | 2.669851  |
| 8           | 6   | -2.388568 | 0.016701  | 1.731603  |
| 9           | 6   | -3.727361 | 0.027545  | 2.124779  |
| 10          | 6   | -4.725481 | 0.048222  | 1.161199  |
| 11          | 6   | -4.359740 | 0.057674  | -0.183008 |
| 12          | 6   | -3.013961 | 0.046119  | -0.510889 |
| 13          | 7   | -2.042051 | 0.025372  | 0.417858  |
| 14          | 1   | 2.019552  | -0.010510 | 2.372824  |
| 15          | 1   | 1.891423  | -0.023319 | 4.853879  |
| 16          | 1   | -0.383365 | -0.017674 | 5.951824  |
| 17          | 1   | -2.401742 | -0.000993 | 4.504497  |
| 18          | 1   | -3.988545 | 0.021058  | 3.181484  |
| 19          | 1   | -5.775082 | 0.057666  | 1.456427  |
| 20          | 1   | -5.104025 | 0.074640  | -0.978644 |
| 21          | 1   | -2.686512 | 0.055493  | -1.550903 |
| 22          | 16  | -0.191428 | 0.014650  | -2.225581 |
| 23          | 6   | 1.466875  | 0.120190  | -2.807189 |
| 24          | 16  | 1.631958  | 0.270395  | -4.562952 |
| 25          | 6   | 2.505312  | -1.268548 | -5.028626 |
| 26          | 6   | 4.011874  | -1.268613 | -4.823243 |
| 27          | 6   | 4.484582  | -1.297265 | -3.378377 |
| 28          | 16  | 4.209830  | 0.232995  | -2.413617 |
| 29          | 6   | 2.509996  | 0.105064  | -1.937473 |
| 30          | 16  | 2.234105  | -0.020487 | -0.203261 |
| 31          | 1   | 2.019227  | -2.101732 | -4.497523 |
| 32          | 1   | 2.276146  | -1.379608 | -6.099762 |
| 33          | 1   | 4.410919  | -2.173009 | -5.317586 |
| 34          | 1   | 5.577402  | -1.427508 | -3.347287 |
| 35          | 1   | 4.035279  | -2.130981 | -2.816605 |
| 36          | 1   | 4.456559  | -0.403259 | -5.341530 |

**Table S13.** Optimised geometry calculated for complex **3** at DFT level [PBE0//cc-pVDZ/LANL08(f)] in the gas phase (total charge = 0, spin multiplicity = 1) in orthogonal Cartesian coordinate format ( $Z$  = atomic number).

| Atom number | $Z$ | $x$       | $y$       | $z$       |
|-------------|-----|-----------|-----------|-----------|
| 1           | 78  | 0.032207  | -0.002622 | -0.024622 |
| 2           | 7   | 0.053757  | -0.006433 | 2.023530  |
| 3           | 6   | 1.109233  | -0.013379 | 2.844616  |
| 4           | 6   | 0.978395  | -0.029977 | 4.234639  |
| 5           | 6   | -0.280315 | -0.035397 | 4.813942  |
| 6           | 6   | -1.410531 | -0.021093 | 3.979648  |
| 7           | 6   | -2.764319 | -0.016420 | 4.454377  |
| 8           | 6   | -3.816817 | 0.010242  | 3.590253  |
| 9           | 6   | -3.614230 | 0.034655  | 2.170277  |
| 10          | 6   | -4.652015 | 0.075653  | 1.224306  |
| 11          | 6   | -4.328297 | 0.105014  | -0.122618 |
| 12          | 6   | -2.990158 | 0.090769  | -0.521344 |
| 13          | 7   | -1.980196 | 0.045159  | 0.353723  |
| 14          | 6   | -2.288755 | 0.021520  | 1.684564  |
| 15          | 6   | -1.191929 | -0.006203 | 2.585065  |
| 16          | 1   | 2.089786  | -0.003598 | 2.365224  |
| 17          | 1   | 1.881030  | -0.037560 | 4.845999  |
| 18          | 1   | -0.401682 | -0.047599 | 5.898688  |
| 19          | 1   | -2.935251 | -0.031815 | 5.532610  |
| 20          | 1   | -4.841205 | 0.016781  | 3.967881  |
| 21          | 1   | -5.692443 | 0.086881  | 1.554364  |
| 22          | 1   | -5.103179 | 0.140348  | -0.888691 |
| 23          | 16  | -0.167158 | -0.024969 | -2.272765 |
| 24          | 6   | 1.478765  | 0.144684  | -2.848024 |
| 25          | 16  | 1.732625  | 0.186295  | -4.592402 |
| 26          | 6   | 3.012427  | -1.118854 | -4.625082 |
| 27          | 6   | 4.336227  | -0.669761 | -4.042206 |
| 28          | 16  | 4.211631  | 0.311741  | -2.485564 |
| 29          | 6   | 2.531049  | 0.115564  | -1.989126 |
| 30          | 16  | 2.276197  | -0.082403 | -0.265144 |
| 31          | 1   | 2.603192  | -1.980729 | -4.078180 |
| 32          | 1   | 3.146923  | -1.407938 | -5.679497 |
| 33          | 1   | 4.862635  | -0.007556 | -4.745273 |
| 34          | 1   | 4.972450  | -1.547457 | -3.841725 |
| 35          | 1   | -2.710016 | 0.118213  | -1.575925 |

**Table S14.** Optimised geometry calculated for complex **3** at DFT level [PBE0//cc-pVDZ/LANL08(f)] in DMSO (SCRF IEF-PCM; total charge = 0, spin multiplicity = 1) in orthogonal Cartesian coordinate format ( $Z$  = atomic number).

| Atom number | $Z$ | $x$       | $y$       | $z$       |
|-------------|-----|-----------|-----------|-----------|
| 1           | 78  | 0.031526  | -0.004143 | -0.017166 |
| 2           | 7   | 0.051591  | -0.012102 | 2.042177  |
| 3           | 6   | 1.102800  | -0.021149 | 2.862199  |
| 4           | 6   | 0.968493  | -0.025674 | 4.255534  |
| 5           | 6   | -0.289515 | -0.019538 | 4.825451  |
| 6           | 6   | -1.420233 | -0.005693 | 3.985690  |
| 7           | 6   | -2.772307 | 0.005139  | 4.462599  |
| 8           | 6   | -3.824284 | 0.024466  | 3.596875  |
| 9           | 6   | -3.616328 | 0.038041  | 2.178381  |
| 10          | 6   | -4.657743 | 0.065263  | 1.230508  |
| 11          | 6   | -4.340485 | 0.083036  | -0.113519 |
| 12          | 6   | -2.999065 | 0.073489  | -0.513434 |
| 13          | 7   | -1.992415 | 0.043939  | 0.360190  |
| 14          | 6   | -2.294155 | 0.026131  | 1.690129  |
| 15          | 6   | -1.195524 | -0.000052 | 2.594240  |
| 16          | 1   | 2.087629  | -0.022493 | 2.393334  |
| 17          | 1   | 1.868325  | -0.033731 | 4.870038  |
| 18          | 1   | -0.415691 | -0.023396 | 5.909222  |
| 19          | 1   | -2.942256 | -0.001746 | 5.540433  |
| 20          | 1   | -4.849317 | 0.032597  | 3.970915  |
| 21          | 1   | -5.696961 | 0.073018  | 1.562892  |
| 22          | 1   | -5.116514 | 0.105229  | -0.878157 |
| 23          | 16  | -0.165566 | 0.018769  | -2.281154 |
| 24          | 6   | 1.497095  | 0.149140  | -2.848536 |
| 25          | 16  | 1.754833  | 0.208821  | -4.595302 |
| 26          | 6   | 3.028004  | -1.102811 | -4.663364 |
| 27          | 6   | 4.354075  | -0.676295 | -4.073904 |
| 28          | 16  | 4.235682  | 0.248054  | -2.479163 |
| 29          | 6   | 2.544419  | 0.087378  | -1.990181 |
| 30          | 16  | 2.289083  | -0.121041 | -0.257861 |
| 31          | 1   | 2.614205  | -1.977435 | -4.141638 |
| 32          | 1   | 3.160178  | -1.360481 | -5.725209 |
| 33          | 1   | 4.881749  | 0.006745  | -4.754406 |
| 34          | 1   | 4.987319  | -1.560666 | -3.902321 |
| 35          | 1   | -2.728616 | 0.090943  | -1.569971 |

**Table S15.** Optimised geometry calculated for complex **3** at DFT level [PBE0//cc-pVDZ/LANL08(f)] in DMF (SCRF IEF-PCM; total charge = 0, spin multiplicity = 1) in orthogonal Cartesian coordinate format ( $Z$  = atomic number).

| Atom number | $Z$ | x         | y         | z         |
|-------------|-----|-----------|-----------|-----------|
| 1           | 78  | 0.031543  | -0.003836 | -0.017397 |
| 2           | 7   | 0.051639  | -0.011815 | 2.041895  |
| 3           | 6   | 1.102903  | -0.020849 | 2.861876  |
| 4           | 6   | 0.968670  | -0.025751 | 4.255199  |
| 5           | 6   | -0.289313 | -0.019962 | 4.825227  |
| 6           | 6   | -1.420060 | -0.006076 | 3.985544  |
| 7           | 6   | -2.772136 | 0.004531  | 4.462480  |
| 8           | 6   | -3.824142 | 0.024011  | 3.596804  |
| 9           | 6   | -3.616266 | 0.037906  | 2.178292  |
| 10          | 6   | -4.657682 | 0.065384  | 1.230460  |
| 11          | 6   | -4.340410 | 0.083490  | -0.113582 |
| 12          | 6   | -2.999015 | 0.073964  | -0.513521 |
| 13          | 7   | -1.992332 | 0.044122  | 0.360079  |
| 14          | 6   | -2.294091 | 0.026098  | 1.690007  |
| 15          | 6   | -1.195425 | -0.000115 | 2.594070  |
| 16          | 1   | 2.087671  | -0.021867 | 2.392878  |
| 17          | 1   | 1.868548  | -0.033802 | 4.869645  |
| 18          | 1   | -0.415413 | -0.024100 | 5.909012  |
| 19          | 1   | -2.942057 | -0.002607 | 5.540324  |
| 20          | 1   | -4.849163 | 0.032029  | 3.970902  |
| 21          | 1   | -5.696905 | 0.073093  | 1.562849  |
| 22          | 1   | -5.116447 | 0.105934  | -0.878212 |
| 23          | 16  | -0.165670 | 0.018185  | -2.281230 |
| 24          | 6   | 1.496786  | 0.149392  | -2.848732 |
| 25          | 16  | 1.754616  | 0.208405  | -4.595477 |
| 26          | 6   | 3.027801  | -1.103265 | -4.662669 |
| 27          | 6   | 4.353852  | -0.676477 | -4.073251 |
| 28          | 16  | 4.235180  | 0.250045  | -2.479826 |
| 29          | 6   | 2.544189  | 0.088406  | -1.990392 |
| 30          | 16  | 2.288980  | -0.119951 | -0.258133 |
| 31          | 1   | 2.613904  | -1.977508 | -4.140384 |
| 32          | 1   | 3.160048  | -1.361675 | -5.724336 |
| 33          | 1   | 4.881971  | 0.005598  | -4.754396 |
| 34          | 1   | 4.986748  | -1.560876 | -3.900447 |
| 35          | 1   | -2.728492 | 0.091696  | -1.570037 |



**Table S16.** Optimised geometry calculated for complex **4** at DFT level [PBE0//cc-pVDZ/LANL08(f)] in the gas phase (total charge = 0, spin multiplicity = 1) in orthogonal Cartesian coordinate format ( $Z$  = atomic number).

| Atom number | $Z$ | $x$       | $y$       | $z$       |
|-------------|-----|-----------|-----------|-----------|
| 1           | 78  | 0.191712  | -0.432150 | -0.004737 |
| 2           | 16  | 0.278436  | -0.670458 | 2.234698  |
| 3           | 6   | 1.980424  | -0.871976 | 2.600366  |
| 4           | 16  | 2.340825  | -1.237379 | 4.290485  |
| 5           | 6   | 3.286317  | 0.235898  | 4.814146  |
| 6           | 6   | 4.760623  | 0.251162  | 4.436436  |
| 7           | 6   | 5.061705  | 0.438908  | 2.956233  |
| 8           | 16  | 4.653507  | -0.972668 | 1.870479  |
| 9           | 6   | 2.917441  | -0.764799 | 1.619785  |
| 10          | 16  | 2.445274  | -0.422637 | -0.032770 |
| 11          | 1   | 2.758133  | 1.125513  | 4.435764  |
| 12          | 1   | 3.185089  | 0.233929  | 5.911253  |
| 13          | 1   | 4.562467  | 1.331945  | 2.547774  |
| 14          | 1   | 6.145897  | 0.572815  | 2.813074  |
| 15          | 7   | -0.043127 | -0.198471 | -2.030774 |
| 16          | 6   | 0.902564  | -0.111113 | -2.971480 |
| 17          | 6   | 0.601553  | 0.056283  | -4.324946 |
| 18          | 6   | -0.718456 | 0.135051  | -4.737688 |
| 19          | 6   | -1.737121 | 0.041363  | -3.774439 |
| 20          | 6   | -3.138729 | 0.101539  | -4.073922 |
| 21          | 6   | -4.076803 | -0.005631 | -3.092248 |
| 22          | 6   | -3.701043 | -0.183018 | -1.719238 |
| 23          | 6   | -4.615229 | -0.310164 | -0.659802 |
| 24          | 6   | -4.129200 | -0.484266 | 0.625674  |
| 25          | 6   | -2.751913 | -0.528742 | 0.852835  |
| 26          | 7   | -1.857049 | -0.405778 | -0.132555 |
| 27          | 6   | -2.326089 | -0.237934 | -1.404221 |
| 28          | 6   | -1.347874 | -0.126154 | -2.427896 |
| 29          | 1   | 1.934385  | -0.179459 | -2.621689 |
| 30          | 1   | 1.421459  | 0.121968  | -5.040531 |
| 31          | 1   | -0.972815 | 0.265302  | -5.791229 |
| 32          | 1   | -3.441174 | 0.233791  | -5.114636 |
| 33          | 1   | -5.139858 | 0.039734  | -3.336998 |
| 34          | 1   | -5.688336 | -0.273418 | -0.856540 |
| 35          | 1   | -4.804670 | -0.589438 | 1.474969  |
| 36          | 1   | -2.344297 | -0.668488 | 1.855830  |
| 37          | 1   | 5.236735  | 1.087462  | 4.982610  |
| 38          | 1   | 5.239167  | -0.676205 | 4.792326  |

**Table S17.** Optimised geometry calculated for complex **4** at DFT level [PBE0//cc-pVDZ/LANL08(f)] in DMSO (SCRF IEF-PCM; total charge = 0, spin multiplicity = 1) in orthogonal Cartesian coordinate format ( $Z$  = atomic number).

| Atom number | $Z$ | $x$       | $y$       | $z$       |
|-------------|-----|-----------|-----------|-----------|
| 1           | 78  | 0.184797  | -0.422496 | -0.010141 |
| 2           | 16  | 0.272467  | -0.680846 | 2.241407  |
| 3           | 6   | 1.985738  | -0.869405 | 2.604437  |
| 4           | 16  | 2.349699  | -1.229301 | 4.298696  |
| 5           | 6   | 3.310620  | 0.232084  | 4.836062  |
| 6           | 6   | 4.782757  | 0.238515  | 4.455939  |
| 7           | 6   | 5.085348  | 0.434779  | 2.978900  |
| 8           | 16  | 4.660954  | -0.965331 | 1.880104  |
| 9           | 6   | 2.921251  | -0.762613 | 1.625471  |
| 10          | 16  | 2.452587  | -0.431982 | -0.039958 |
| 11          | 1   | 2.788280  | 1.128770  | 4.467767  |
| 12          | 1   | 3.209682  | 0.216440  | 5.932296  |
| 13          | 1   | 4.595763  | 1.335204  | 2.576325  |
| 14          | 1   | 6.170196  | 0.554567  | 2.834273  |
| 15          | 7   | -0.049419 | -0.181561 | -2.045024 |
| 16          | 6   | 0.893508  | -0.082900 | -2.982253 |
| 17          | 6   | 0.590064  | 0.074912  | -4.339612 |
| 18          | 6   | -0.728297 | 0.131533  | -4.747379 |
| 19          | 6   | -1.747761 | 0.028839  | -3.781020 |
| 20          | 6   | -3.148001 | 0.071358  | -4.086453 |
| 21          | 6   | -4.086415 | -0.035904 | -3.104498 |
| 22          | 6   | -3.706831 | -0.195137 | -1.731061 |
| 23          | 6   | -4.625115 | -0.313935 | -0.669768 |
| 24          | 6   | -4.146601 | -0.466598 | 0.616807  |
| 25          | 6   | -2.766380 | -0.501444 | 0.847417  |
| 26          | 7   | -1.873529 | -0.390327 | -0.136308 |
| 27          | 6   | -2.334885 | -0.238803 | -1.410460 |
| 28          | 6   | -1.354444 | -0.126645 | -2.436381 |
| 29          | 1   | 1.928313  | -0.132744 | -2.640742 |
| 30          | 1   | 1.407793  | 0.150040  | -5.055909 |
| 31          | 1   | -0.986105 | 0.253276  | -5.800587 |
| 32          | 1   | -3.448102 | 0.191148  | -5.128695 |
| 33          | 1   | -5.149500 | -0.003313 | -3.348357 |
| 34          | 1   | -5.697132 | -0.285179 | -0.870980 |
| 35          | 1   | -4.823976 | -0.562311 | 1.464986  |
| 36          | 1   | -2.368912 | -0.624145 | 1.855832  |
| 37          | 1   | 5.259900  | 1.071993  | 5.002868  |
| 38          | 1   | 5.261618  | -0.688222 | 4.812400  |

**Table S18.** Optimised geometry calculated for complex **4** at DFT level [PBE0//cc-pVDZ/LANL08(f)] in DMF (SCRF IEF-PCM; total charge = 0, spin multiplicity = 1) in orthogonal Cartesian coordinate format ( $Z$  = atomic number).

| Atom number | $Z$ | $x$       | $y$       | $z$       |
|-------------|-----|-----------|-----------|-----------|
| 1           | 78  | 0.184928  | -0.422583 | -0.010110 |
| 2           | 16  | 0.272665  | -0.680972 | 2.241271  |
| 3           | 6   | 1.985847  | -0.869575 | 2.604316  |
| 4           | 16  | 2.349764  | -1.229735 | 4.298498  |
| 5           | 6   | 3.310351  | 0.231806  | 4.835935  |
| 6           | 6   | 4.782519  | 0.238633  | 4.455824  |
| 7           | 6   | 5.085063  | 0.435071  | 2.978768  |
| 8           | 16  | 4.661061  | -0.965015 | 1.879845  |
| 9           | 6   | 2.921344  | -0.762508 | 1.625358  |
| 10          | 16  | 2.452558  | -0.431519 | -0.039880 |
| 11          | 1   | 2.787825  | 1.128398  | 4.467667  |
| 12          | 1   | 3.209441  | 0.216146  | 5.932182  |
| 13          | 1   | 4.595226  | 1.335406  | 2.576288  |
| 14          | 1   | 6.169890  | 0.555219  | 2.834195  |
| 15          | 7   | -0.049374 | -0.181746 | -2.044955 |
| 16          | 6   | 0.893557  | -0.083306 | -2.982223 |
| 17          | 6   | 0.590121  | 0.074524  | -4.339566 |
| 18          | 6   | -0.728245 | 0.131402  | -4.747352 |
| 19          | 6   | -1.747696 | 0.028901  | -3.780989 |
| 20          | 6   | -3.147953 | 0.071633  | -4.086347 |
| 21          | 6   | -4.086350 | -0.035540 | -3.104369 |
| 22          | 6   | -3.706774 | -0.194918 | -1.730938 |
| 23          | 6   | -4.625007 | -0.313730 | -0.669631 |
| 24          | 6   | -4.146406 | -0.466604 | 0.616910  |
| 25          | 6   | -2.766193 | -0.501617 | 0.847450  |
| 26          | 7   | -1.873358 | -0.390445 | -0.136303 |
| 27          | 6   | -2.334804 | -0.238748 | -1.410405 |
| 28          | 6   | -1.354386 | -0.126645 | -2.436343 |
| 29          | 1   | 1.928332  | -0.133373 | -2.640641 |
| 30          | 1   | 1.407871  | 0.149458  | -5.055869 |
| 31          | 1   | -0.986036 | 0.253169  | -5.800569 |
| 32          | 1   | -3.448092 | 0.191500  | -5.128578 |
| 33          | 1   | -5.149442 | -0.002795 | -3.348215 |
| 34          | 1   | -5.697040 | -0.284847 | -0.870777 |
| 35          | 1   | -4.823738 | -0.562362 | 1.465126  |
| 36          | 1   | -2.368602 | -0.624490 | 1.855799  |
| 37          | 1   | 5.259491  | 1.072174  | 5.002846  |
| 38          | 1   | 5.261570  | -0.688052 | 4.812183  |

**Table S19.** Optimised geometry calculated for complex **5** at DFT level [PBE0//cc-pVDZ/LANL08(f)] in the gas phase (total charge = 0, spin multiplicity = 1) in orthogonal Cartesian coordinate format ( $Z$  = atomic number).

| Atom number | $Z$ | x         | y         | z         |
|-------------|-----|-----------|-----------|-----------|
| 1           | 6   | -0.019368 | 0.010726  | -0.000044 |
| 2           | 6   | -0.015427 | 0.011403  | 1.399265  |
| 3           | 7   | 1.150534  | -0.001837 | 2.099590  |
| 4           | 6   | 2.309117  | -0.004818 | 1.409959  |
| 5           | 6   | 2.358498  | -0.004851 | 0.031694  |
| 6           | 6   | 1.169342  | 0.001288  | -0.716854 |
| 7           | 6   | -1.219224 | 0.040790  | 2.221767  |
| 8           | 7   | -0.990616 | 0.050179  | 3.562660  |
| 9           | 6   | -2.053670 | 0.100835  | 4.390586  |
| 10          | 6   | -3.354971 | 0.133348  | 3.935065  |
| 11          | 6   | -3.620196 | 0.117553  | 2.555239  |
| 12          | 6   | -2.520781 | 0.071878  | 1.708979  |
| 13          | 78  | 0.967813  | -0.026331 | 4.132138  |
| 14          | 16  | 0.573323  | -0.074617 | 6.358383  |
| 15          | 6   | 2.162108  | 0.062567  | 7.086496  |
| 16          | 6   | 3.281634  | 0.037875  | 6.316828  |
| 17          | 16  | 4.885645  | 0.017162  | 7.049418  |
| 18          | 6   | 4.503510  | -1.262126 | 8.298182  |
| 19          | 6   | 3.593396  | -0.764393 | 9.401824  |
| 20          | 16  | 2.176727  | 0.273046  | 8.837445  |
| 21          | 16  | 3.180595  | -0.142551 | 4.578130  |
| 22          | 6   | -5.023732 | 0.151468  | 2.035812  |
| 23          | 6   | 1.196309  | 0.000508  | -2.213572 |
| 24          | 1   | 4.056262  | -2.110161 | 7.759427  |
| 25          | 1   | 5.464812  | -1.589290 | 8.725265  |
| 26          | 1   | 4.148946  | -0.119240 | 10.098355 |
| 27          | 1   | 3.186334  | -1.620895 | 9.964090  |
| 28          | 1   | -1.823223 | 0.117550  | 5.457021  |
| 29          | 1   | -4.167912 | 0.172025  | 4.661924  |
| 30          | 1   | -2.673274 | 0.061801  | 0.629600  |
| 31          | 1   | -0.969423 | 0.019538  | -0.534573 |
| 32          | 1   | 3.331706  | -0.009063 | -0.461791 |
| 33          | 1   | 3.218899  | -0.004660 | 2.012385  |
| 34          | 1   | 1.734359  | 0.882362  | -2.595381 |
| 35          | 1   | 1.723608  | -0.888170 | -2.594581 |
| 36          | 1   | 0.184060  | 0.006477  | -2.639344 |
| 37          | 1   | -5.052474 | 0.134816  | 0.938149  |
| 38          | 1   | -5.598972 | -0.711161 | 2.407233  |
| 39          | 1   | -5.545930 | 1.058360  | 2.379032  |

**Table S20.** Optimised geometry calculated for complex **5** at DFT level [PBE0//cc-pVDZ/LANL08(f)] in DMSO (SCRF IEF-PCM; total charge = 0, spin multiplicity = 1) in orthogonal Cartesian coordinate format ( $Z$  = atomic number).

| Atom number | $Z$ | $x$       | $y$       | $z$       |
|-------------|-----|-----------|-----------|-----------|
| 1           | 6   | -0.027427 | 0.005876  | 0.000219  |
| 2           | 6   | -0.017343 | 0.020327  | 1.394584  |
| 3           | 7   | 1.147430  | 0.013800  | 2.090864  |
| 4           | 6   | 2.303746  | 0.003574  | 1.403154  |
| 5           | 6   | 2.352320  | -0.007703 | 0.022369  |
| 6           | 6   | 1.164393  | -0.010260 | -0.720871 |
| 7           | 6   | -1.229642 | 0.046043  | 2.219217  |
| 8           | 7   | -1.010762 | 0.024179  | 3.558311  |
| 9           | 6   | -2.075018 | 0.057627  | 4.380852  |
| 10          | 6   | -3.375984 | 0.110251  | 3.918522  |
| 11          | 6   | -3.629927 | 0.135766  | 2.540698  |
| 12          | 6   | -2.521543 | 0.102226  | 1.697483  |
| 13          | 78  | 0.957474  | -0.027822 | 4.132857  |
| 14          | 16  | 0.556029  | -0.146230 | 6.371103  |
| 15          | 6   | 2.149718  | 0.019532  | 7.106726  |
| 16          | 6   | 3.269232  | 0.060529  | 6.343657  |
| 17          | 16  | 4.874329  | 0.080973  | 7.082225  |
| 18          | 6   | 4.553001  | -1.229310 | 8.317288  |
| 19          | 6   | 3.625024  | -0.786283 | 9.426407  |
| 20          | 16  | 2.144148  | 0.166401  | 8.868691  |
| 21          | 16  | 3.187776  | -0.058314 | 4.588200  |
| 22          | 6   | -5.025558 | 0.200658  | 2.009157  |
| 23          | 6   | 1.183439  | -0.032477 | -2.215390 |
| 24          | 1   | 4.148794  | -2.092752 | 7.769998  |
| 25          | 1   | 5.528959  | -1.510835 | 8.741171  |
| 26          | 1   | 4.144582  | -0.114308 | 10.123947 |
| 27          | 1   | 3.266375  | -1.664605 | 9.985480  |
| 28          | 1   | -1.858606 | 0.045936  | 5.449413  |
| 29          | 1   | -4.192723 | 0.135171  | 4.640999  |
| 30          | 1   | -2.668325 | 0.125839  | 0.618361  |
| 31          | 1   | -0.976888 | 0.003480  | -0.533907 |
| 32          | 1   | 3.324534  | -0.016845 | -0.471946 |
| 33          | 1   | 3.218045  | 0.004733  | 1.997165  |
| 34          | 1   | 1.754690  | 0.823113  | -2.606375 |
| 35          | 1   | 1.682049  | -0.944392 | -2.578514 |
| 36          | 1   | 0.170361  | 0.001089  | -2.635181 |
| 37          | 1   | -5.042520 | 0.208648  | 0.912180  |
| 38          | 1   | -5.612325 | -0.660846 | 2.362823  |
| 39          | 1   | -5.533514 | 1.106601  | 2.373862  |

**Table S21.** Optimised geometry calculated for complex **5** at DFT level [PBE0//cc-pVDZ/LANL08(f)] in acetonitrile (SCRF IEF-PCM; total charge = 0, spin multiplicity = 1) in orthogonal Cartesian coordinate format ( $Z$  = atomic number).

| Atom number | $Z$ | $x$       | $y$       | $z$       |
|-------------|-----|-----------|-----------|-----------|
| 1           | 6   | -0.027338 | 0.006065  | 0.000123  |
| 2           | 6   | -0.017202 | 0.020175  | 1.394543  |
| 3           | 7   | 1.147602  | 0.013448  | 2.090758  |
| 4           | 6   | 2.303890  | 0.003382  | 1.402979  |
| 5           | 6   | 2.352384  | -0.007555 | 0.022204  |
| 6           | 6   | 1.164417  | -0.009867 | -0.721000 |
| 7           | 6   | -1.229380 | 0.046016  | 2.219298  |
| 8           | 7   | -1.010255 | 0.025124  | 3.558363  |
| 9           | 6   | -2.074375 | 0.058967  | 4.381078  |
| 10          | 6   | -3.375427 | 0.110862  | 3.918951  |
| 11          | 6   | -3.629653 | 0.135160  | 2.541144  |
| 12          | 6   | -2.521450 | 0.101394  | 1.697770  |
| 13          | 78  | 0.957966  | -0.027529 | 4.132760  |
| 14          | 16  | 0.556708  | -0.143426 | 6.370983  |
| 15          | 6   | 2.150553  | 0.021355  | 7.106228  |
| 16          | 6   | 3.270042  | 0.059835  | 6.342961  |
| 17          | 16  | 4.875145  | 0.078146  | 7.081478  |
| 18          | 6   | 4.551374  | -1.230805 | 8.317315  |
| 19          | 6   | 3.624127  | -0.785486 | 9.426189  |
| 20          | 16  | 2.145807  | 0.170785  | 8.867926  |
| 21          | 16  | 3.188113  | -0.060847 | 4.587775  |
| 22          | 6   | -5.025463 | 0.198926  | 2.009851  |
| 23          | 6   | 1.183482  | -0.031446 | -2.215561 |
| 24          | 1   | 4.145466  | -2.093718 | 7.770445  |
| 25          | 1   | 5.526801  | -1.514041 | 8.741317  |
| 26          | 1   | 4.145080  | -0.114591 | 10.123753 |
| 27          | 1   | 3.263366  | -1.662936 | 9.985308  |
| 28          | 1   | -1.857657 | 0.048193  | 5.449592  |
| 29          | 1   | -4.192048 | 0.136123  | 4.641559  |
| 30          | 1   | -2.668493 | 0.124104  | 0.618655  |
| 31          | 1   | -0.976815 | 0.003905  | -0.534001 |
| 32          | 1   | 3.324573  | -0.016544 | -0.472178 |
| 33          | 1   | 3.218160  | 0.004473  | 1.997041  |
| 34          | 1   | 1.753647  | 0.825032  | -2.606226 |
| 35          | 1   | 1.683133  | -0.942588 | -2.579191 |
| 36          | 1   | 0.170365  | 0.001156  | -2.635359 |
| 37          | 1   | -5.042623 | 0.207345  | 0.912868  |
| 38          | 1   | -5.611320 | -0.663372 | 2.363129  |
| 39          | 1   | -5.534362 | 1.104168  | 2.374973  |

**Table S22.** Optimised geometry calculated for complex **5** at DFT level [PBE0//cc-pVDZ/LANL08(f)] in acetone (SCRF IEF-PCM; total charge = 0, spin multiplicity = 1) in orthogonal Cartesian coordinate format ( $Z$  = atomic number).

| Atom number | $Z$ | $x$       | $y$       | $z$       |
|-------------|-----|-----------|-----------|-----------|
| 1           | 6   | -0.027028 | 0.005949  | -0.000003 |
| 2           | 6   | -0.016722 | 0.019347  | 1.394592  |
| 3           | 7   | 1.148191  | 0.011771  | 2.090618  |
| 4           | 6   | 2.304368  | 0.001574  | 1.402549  |
| 5           | 6   | 2.352581  | -0.008707 | 0.021831  |
| 6           | 6   | 1.164469  | -0.009858 | -0.721270 |
| 7           | 6   | -1.228509 | 0.046053  | 2.219692  |
| 8           | 7   | -1.008644 | 0.028381  | 3.558686  |
| 9           | 6   | -2.072412 | 0.063786  | 4.381873  |
| 10          | 6   | -3.373679 | 0.113667  | 3.920322  |
| 11          | 6   | -3.628750 | 0.133974  | 2.542544  |
| 12          | 6   | -2.521080 | 0.099147  | 1.698760  |
| 13          | 78  | 0.959506  | -0.026498 | 4.132610  |
| 14          | 16  | 0.558876  | -0.133218 | 6.370817  |
| 15          | 6   | 2.153289  | 0.028235  | 7.104703  |
| 16          | 6   | 3.272680  | 0.058350  | 6.340741  |
| 17          | 16  | 4.877697  | 0.070069  | 7.079317  |
| 18          | 6   | 4.546301  | -1.235301 | 8.316978  |
| 19          | 6   | 3.620916  | -0.783548 | 9.425057  |
| 20          | 16  | 2.151946  | 0.186043  | 8.865482  |
| 21          | 16  | 3.189154  | -0.068951 | 4.586493  |
| 22          | 6   | -5.025086 | 0.194016  | 2.011990  |
| 23          | 6   | 1.183605  | -0.028610 | -2.215950 |
| 24          | 1   | 4.135426  | -2.096367 | 7.770907  |
| 25          | 1   | 5.519961  | -1.523924 | 8.741511  |
| 26          | 1   | 4.146181  | -0.117349 | 10.123969 |
| 27          | 1   | 3.252543  | -1.658696 | 9.982921  |
| 28          | 1   | -1.854812 | 0.055809  | 5.450250  |
| 29          | 1   | -4.189949 | 0.140309  | 4.643303  |
| 30          | 1   | -2.668772 | 0.118871  | 0.619647  |
| 31          | 1   | -0.976620 | 0.004626  | -0.533999 |
| 32          | 1   | 3.324668  | -0.017846 | -0.472781 |
| 33          | 1   | 3.218568  | 0.002251  | 1.996746  |
| 34          | 1   | 1.739781  | 0.837929  | -2.604894 |
| 35          | 1   | 1.697540  | -0.930690 | -2.582027 |
| 36          | 1   | 0.170041  | -0.010530 | -2.635625 |
| 37          | 1   | -5.042706 | 0.207342  | 0.915027  |
| 38          | 1   | -5.606726 | -0.672945 | 2.360980  |
| 39          | 1   | -5.538455 | 1.094931  | 2.381432  |

**Table S23.** Optimised geometry calculated for complex **5** at DFT level [PBE0//cc-pVDZ/LANL08(f)] in DMF (SCRF IEF-PCM; total charge = 0, spin multiplicity = 1) in orthogonal Cartesian coordinate format ( $Z$  = atomic number).

| Atom number | $Z$ | $x$       | $y$       | $z$       |
|-------------|-----|-----------|-----------|-----------|
| 1           | 6   | -0.027355 | 0.006034  | 0.000138  |
| 2           | 6   | -0.017223 | 0.020207  | 1.394550  |
| 3           | 7   | 1.147572  | 0.013525  | 2.090772  |
| 4           | 6   | 2.303869  | 0.003427  | 1.403010  |
| 5           | 6   | 2.352375  | -0.007579 | 0.022234  |
| 6           | 6   | 1.164413  | -0.009937 | -0.720976 |
| 7           | 6   | -1.229424 | 0.046018  | 2.219287  |
| 8           | 7   | -1.010342 | 0.024963  | 3.558351  |
| 9           | 6   | -2.074480 | 0.058749  | 4.381044  |
| 10          | 6   | -3.375518 | 0.110765  | 3.918882  |
| 11          | 6   | -3.629696 | 0.135259  | 2.541071  |
| 12          | 6   | -2.521466 | 0.101526  | 1.697719  |
| 13          | 78  | 0.957886  | -0.027566 | 4.132780  |
| 14          | 16  | 0.556593  | -0.143910 | 6.371002  |
| 15          | 6   | 2.150408  | 0.021052  | 7.106319  |
| 16          | 6   | 3.269902  | 0.059977  | 6.343089  |
| 17          | 16  | 4.875003  | 0.078648  | 7.081612  |
| 18          | 6   | 4.551647  | -1.230552 | 8.317299  |
| 19          | 6   | 3.624270  | -0.785645 | 9.426218  |
| 20          | 16  | 2.145514  | 0.170027  | 8.868060  |
| 21          | 16  | 3.188056  | -0.060363 | 4.587853  |
| 22          | 6   | -5.025479 | 0.199218  | 2.009741  |
| 23          | 6   | 1.183481  | -0.031636 | -2.215531 |
| 24          | 1   | 4.146034  | -2.093547 | 7.770340  |
| 25          | 1   | 5.527167  | -1.513496 | 8.741275  |
| 26          | 1   | 4.144982  | -0.114579 | 10.123794 |
| 27          | 1   | 3.263865  | -1.663255 | 9.985309  |
| 28          | 1   | -1.857807 | 0.047837  | 5.449564  |
| 29          | 1   | -4.192161 | 0.135978  | 4.641464  |
| 30          | 1   | -2.668471 | 0.124383  | 0.618605  |
| 31          | 1   | -0.976826 | 0.003830  | -0.533991 |
| 32          | 1   | 3.324565  | -0.016600 | -0.472142 |
| 33          | 1   | 3.218141  | 0.004533  | 1.997066  |
| 34          | 1   | 1.753816  | 0.824697  | -2.606256 |
| 35          | 1   | 1.682974  | -0.942903 | -2.579065 |
| 36          | 1   | 0.170371  | 0.001107  | -2.635331 |
| 37          | 1   | -5.042611 | 0.207548  | 0.912759  |
| 38          | 1   | -5.611496 | -0.662935 | 2.363102  |
| 39          | 1   | -5.534209 | 1.104588  | 2.374783  |



**Table S24.** Optimised geometry calculated for complex **5** at DFT level [PBE0//cc-pVDZ/LANL08(f)] in dichloromethane (SCRF IEF-PCM; total charge = 0, spin multiplicity = 1) in orthogonal Cartesian coordinate format ( $Z$  = atomic number).

| Atom number | $Z$ | x         | y         | z         |
|-------------|-----|-----------|-----------|-----------|
| 1           | 6   | -0.025997 | 0.006765  | -0.000130 |
| 2           | 6   | -0.015997 | 0.018312  | 1.394882  |
| 3           | 7   | 1.149151  | 0.010124  | 2.090948  |
| 4           | 6   | 2.305252  | 0.001026  | 1.402574  |
| 5           | 6   | 2.353356  | -0.007854 | 0.021949  |
| 6           | 6   | 1.165208  | -0.007934 | -0.721285 |
| 7           | 6   | -1.226866 | 0.045642  | 2.220459  |
| 8           | 7   | -1.005317 | 0.034832  | 3.559492  |
| 9           | 6   | -2.068331 | 0.073079  | 4.383664  |
| 10          | 6   | -3.370159 | 0.118135  | 3.923479  |
| 11          | 6   | -3.627140 | 0.129884  | 2.545860  |
| 12          | 6   | -2.520692 | 0.092917  | 1.701116  |
| 13          | 78  | 0.962201  | -0.023604 | 4.132389  |
| 14          | 16  | 0.563066  | -0.115319 | 6.369969  |
| 15          | 6   | 2.157962  | 0.040716  | 7.101459  |
| 16          | 6   | 3.277037  | 0.056348  | 6.336244  |
| 17          | 16  | 4.881690  | 0.056211  | 7.074876  |
| 18          | 6   | 4.536554  | -1.243587 | 8.314573  |
| 19          | 6   | 3.614297  | -0.781538 | 9.421586  |
| 20          | 16  | 2.163323  | 0.213381  | 8.860431  |
| 21          | 16  | 3.190346  | -0.082759 | 4.584198  |
| 22          | 6   | -5.024578 | 0.183347  | 2.016821  |
| 23          | 6   | 1.184708  | -0.023270 | -2.216260 |
| 24          | 1   | 4.116655  | -2.100691 | 7.769099  |
| 25          | 1   | 5.506970  | -1.542442 | 8.739782  |
| 26          | 1   | 4.147328  | -0.125082 | 10.124035 |
| 27          | 1   | 3.231823  | -1.653131 | 9.975799  |
| 28          | 1   | -1.848665 | 0.071173  | 5.451707  |
| 29          | 1   | -4.185530 | 0.147317  | 4.647446  |
| 30          | 1   | -2.670234 | 0.105607  | 0.622081  |
| 31          | 1   | -0.975476 | 0.006935  | -0.534528 |
| 32          | 1   | 3.325505  | -0.016157 | -0.472660 |
| 33          | 1   | 3.219094  | 0.001980  | 1.997416  |
| 34          | 1   | 1.732776  | 0.849192  | -2.603739 |
| 35          | 1   | 1.706006  | -0.919934 | -2.585219 |
| 36          | 1   | 0.171041  | -0.012691 | -2.636206 |
| 37          | 1   | -5.043796 | 0.190279  | 0.919713  |
| 38          | 1   | -5.604081 | -0.683051 | 2.370849  |
| 39          | 1   | -5.540152 | 1.085234  | 2.380930  |

**Table S25.** Optimised geometry calculated for complex **5** at DFT level [PBE0//cc-pVDZ/LANL08(f)] in chloroform (SCRF IEF-PCM; total charge = 0, spin multiplicity = 1) in orthogonal Cartesian coordinate format ( $Z$  = atomic number).

| Atom number | $Z$ | x         | y         | z         |
|-------------|-----|-----------|-----------|-----------|
| 1           | 6   | -0.024469 | 0.006830  | 0.000167  |
| 2           | 6   | -0.015262 | 0.018093  | 1.395849  |
| 3           | 7   | 1.149699  | 0.011857  | 2.092427  |
| 4           | 6   | 2.306229  | 0.005712  | 1.404085  |
| 5           | 6   | 2.354568  | -0.003144 | 0.023783  |
| 6           | 6   | 1.166457  | -0.005745 | -0.720279 |
| 7           | 6   | -1.225396 | 0.045621  | 2.221388  |
| 8           | 7   | -1.002417 | 0.042438  | 3.560321  |
| 9           | 6   | -2.065049 | 0.084628  | 4.385356  |
| 10          | 6   | -3.367045 | 0.124571  | 3.926111  |
| 11          | 6   | -3.625772 | 0.126363  | 2.548339  |
| 12          | 6   | -2.520579 | 0.086599  | 1.703135  |
| 13          | 78  | 0.964089  | -0.019552 | 4.133127  |
| 14          | 16  | 0.565680  | -0.103987 | 6.368667  |
| 15          | 6   | 2.159868  | 0.049170  | 7.099271  |
| 16          | 6   | 3.278798  | 0.056545  | 6.333239  |
| 17          | 16  | 4.882903  | 0.049999  | 7.071856  |
| 18          | 6   | 4.528976  | -1.249425 | 8.309424  |
| 19          | 6   | 3.608210  | -0.783283 | 9.416550  |
| 20          | 16  | 2.169271  | 0.228970  | 8.856807  |
| 21          | 16  | 3.189517  | -0.091655 | 4.583392  |
| 22          | 6   | -5.024519 | 0.172128  | 2.021077  |
| 23          | 6   | 1.187453  | -0.022084 | -2.215568 |
| 24          | 1   | 4.103158  | -2.102327 | 7.761868  |
| 25          | 1   | 5.497067  | -1.556306 | 8.734632  |
| 26          | 1   | 4.146238  | -0.134505 | 10.122567 |
| 27          | 1   | 3.216838  | -1.653745 | 9.966727  |
| 28          | 1   | -1.843025 | 0.090144  | 5.453005  |
| 29          | 1   | -4.181902 | 0.157272  | 4.650629  |
| 30          | 1   | -2.671230 | 0.091628  | 0.624074  |
| 31          | 1   | -0.973906 | 0.006434  | -0.534549 |
| 32          | 1   | 3.326892  | -0.008828 | -0.470703 |
| 33          | 1   | 3.219221  | 0.009605  | 2.000397  |
| 34          | 1   | 1.746985  | 0.842532  | -2.604229 |
| 35          | 1   | 1.696347  | -0.926276 | -2.583912 |
| 36          | 1   | 0.174434  | 0.001173  | -2.636918 |
| 37          | 1   | -5.045443 | 0.179011  | 0.923855  |
| 38          | 1   | -5.598975 | -0.697959 | 2.374623  |
| 39          | 1   | -5.545570 | 1.070888  | 2.385206  |

**Table S26.** Optimised geometry calculated for complex **5** at DFT level [PBE0//cc-pVDZ/LANL08(f)] in THF (SCRF IEF-PCM; total charge = 0, spin multiplicity = 1) in orthogonal Cartesian coordinate format ( $Z$  = atomic number).

| Atom number | $Z$ | $x$       | $y$       | $z$       |
|-------------|-----|-----------|-----------|-----------|
| 1           | 6   | -0.025702 | 0.006986  | -0.000114 |
| 2           | 6   | -0.015805 | 0.018747  | 1.395085  |
| 3           | 7   | 1.149208  | 0.011789  | 2.091204  |
| 4           | 6   | 2.305481  | 0.004377  | 1.402874  |
| 5           | 6   | 2.353600  | -0.004575 | 0.022361  |
| 6           | 6   | 1.165420  | -0.006545 | -0.721082 |
| 7           | 6   | -1.226593 | 0.046025  | 2.220699  |
| 8           | 7   | -1.004726 | 0.037895  | 3.559600  |
| 9           | 6   | -2.067645 | 0.077468  | 4.384027  |
| 10          | 6   | -3.369484 | 0.120493  | 3.924011  |
| 11          | 6   | -3.626892 | 0.128721  | 2.546297  |
| 12          | 6   | -2.520757 | 0.091018  | 1.701484  |
| 13          | 78  | 0.962676  | -0.022069 | 4.132637  |
| 14          | 16  | 0.563688  | -0.113218 | 6.369631  |
| 15          | 6   | 2.158468  | 0.041915  | 7.101012  |
| 16          | 6   | 3.277457  | 0.055536  | 6.335578  |
| 17          | 16  | 4.882076  | 0.053713  | 7.073972  |
| 18          | 6   | 4.534761  | -1.245710 | 8.313476  |
| 19          | 6   | 3.613312  | -0.781983 | 9.420566  |
| 20          | 16  | 2.164375  | 0.215818  | 8.859655  |
| 21          | 16  | 3.189989  | -0.085766 | 4.583992  |
| 22          | 6   | -5.024728 | 0.179129  | 2.017778  |
| 23          | 6   | 1.185434  | -0.023681 | -2.216111 |
| 24          | 1   | 4.113019  | -2.101763 | 7.767755  |
| 25          | 1   | 5.504604  | -1.546695 | 8.738581  |
| 26          | 1   | 4.147773  | -0.126511 | 10.122909 |
| 27          | 1   | 3.229319  | -1.652907 | 9.974890  |
| 28          | 1   | -1.847320 | 0.078412  | 5.451958  |
| 29          | 1   | -4.184822 | 0.150809  | 4.648004  |
| 30          | 1   | -2.670475 | 0.101244  | 0.622417  |
| 31          | 1   | -0.975230 | 0.006363  | -0.534485 |
| 32          | 1   | 3.325754  | -0.011223 | -0.472319 |
| 33          | 1   | 3.219064  | 0.007032  | 1.998148  |
| 34          | 1   | 1.747723  | 0.839010  | -2.604876 |
| 35          | 1   | 1.692071  | -0.929468 | -2.583520 |
| 36          | 1   | 0.172268  | 0.002114  | -2.636676 |
| 37          | 1   | -5.044407 | 0.187160  | 0.920656  |
| 38          | 1   | -5.601768 | -0.689382 | 2.370770  |
| 39          | 1   | -5.542848 | 1.079114  | 2.382957  |

**Table S27.** Optimised geometry calculated for complex **5** at DFT level [PBE0//cc-pVDZ/LANL08(f)] in toluene (SCRF IEF-PCM; total charge = 0, spin multiplicity = 1) in orthogonal Cartesian coordinate format ( $Z$  = atomic number).

| Atom number | $Z$ | $x$       | $y$       | $z$       |
|-------------|-----|-----------|-----------|-----------|
| 1           | 6   | -0.022222 | 0.007008  | 0.000724  |
| 2           | 6   | -0.014755 | 0.016191  | 1.397540  |
| 3           | 7   | 1.150259  | 0.009819  | 2.095361  |
| 4           | 6   | 2.307442  | 0.005398  | 1.406817  |
| 5           | 6   | 2.356257  | -0.002417 | 0.027083  |
| 6           | 6   | 1.168137  | -0.004329 | -0.718491 |
| 7           | 6   | -1.223150 | 0.044346  | 2.222390  |
| 8           | 7   | -0.998047 | 0.049231  | 3.561673  |
| 9           | 6   | -2.060508 | 0.096324  | 4.387740  |
| 10          | 6   | -3.362527 | 0.131628  | 3.929859  |
| 11          | 6   | -3.623730 | 0.122599  | 2.551747  |
| 12          | 6   | -2.520480 | 0.078892  | 1.706051  |
| 13          | 78  | 0.966054  | -0.017650 | 4.133782  |
| 14          | 16  | 0.568858  | -0.089125 | 6.365907  |
| 15          | 6   | 2.161465  | 0.059023  | 7.095324  |
| 16          | 6   | 3.280383  | 0.054953  | 6.328058  |
| 17          | 16  | 4.883962  | 0.041895  | 7.065703  |
| 18          | 6   | 4.519130  | -1.255226 | 8.302207  |
| 19          | 6   | 3.600309  | -0.782644 | 9.409044  |
| 20          | 16  | 2.175416  | 0.248861  | 8.850690  |
| 21          | 16  | 3.187022  | -0.106370 | 4.581972  |
| 22          | 6   | -5.024232 | 0.161451  | 2.027059  |
| 23          | 6   | 1.191245  | -0.017289 | -2.214323 |
| 24          | 1   | 4.086129  | -2.103968 | 7.753591  |
| 25          | 1   | 5.484395  | -1.571285 | 8.727767  |
| 26          | 1   | 4.144548  | -0.141983 | 10.118063 |
| 27          | 1   | 3.198836  | -1.650949 | 9.955981  |
| 28          | 1   | -1.835217 | 0.109189  | 5.454859  |
| 29          | 1   | -4.176548 | 0.168505  | 4.655300  |
| 30          | 1   | -2.672399 | 0.074646  | 0.626969  |
| 31          | 1   | -0.971638 | 0.008564  | -0.534389 |
| 32          | 1   | 3.328966  | -0.006994 | -0.466930 |
| 33          | 1   | 3.219202  | 0.010365  | 2.005377  |
| 34          | 1   | 1.740994  | 0.854336  | -2.601824 |
| 35          | 1   | 1.708865  | -0.915315 | -2.585825 |
| 36          | 1   | 0.178428  | -0.003240 | -2.637235 |
| 37          | 1   | -5.047872 | 0.159476  | 0.929609  |
| 38          | 1   | -5.597412 | -0.706924 | 2.387221  |
| 39          | 1   | -5.547222 | 1.062397  | 2.383348  |

**Table S28.** Optimised geometry calculated for complex **6** at DFT level [PBE0//cc-pVDZ/LANL08(f)] in the gas phase (total charge = 0, spin multiplicity = 1) in orthogonal Cartesian coordinate format ( $Z$  = atomic number).

| Atom number | $Z$ | x         | y         | z         | Atom number | $Z$ | x         | y         | z         |
|-------------|-----|-----------|-----------|-----------|-------------|-----|-----------|-----------|-----------|
| 1           | 6   | -3.175848 | -1.512666 | 0.029628  | 30          | 1   | -4.128510 | 1.023090  | 0.072988  |
| 2           | 6   | -2.016970 | -0.736016 | 0.009422  | 31          | 1   | -4.141272 | -1.009075 | 0.065302  |
| 3           | 7   | -0.783369 | -1.311896 | -0.032687 | 32          | 1   | -1.683112 | -4.543703 | -0.075703 |
| 4           | 6   | -0.715222 | -2.653780 | -0.065449 | 33          | 1   | 0.289574  | -3.077118 | -0.109614 |
| 5           | 6   | -1.834600 | -3.466069 | -0.048170 | 34          | 6   | -4.103925 | -5.238170 | -0.009600 |
| 6           | 6   | -3.119101 | -2.905286 | 0.002723  | 35          | 6   | -5.181175 | -3.421950 | 1.310083  |
| 7           | 6   | -2.005950 | 0.724414  | 0.015547  | 36          | 6   | -5.253860 | -3.378119 | -1.200780 |
| 8           | 7   | -0.767295 | 1.280892  | -0.021202 | 37          | 6   | -5.613125 | 3.020171  | 0.104938  |
| 9           | 6   | -0.679243 | 2.625783  | -0.041636 | 38          | 6   | -4.231110 | 4.711279  | 1.302435  |
| 10          | 6   | -1.785566 | 3.448095  | -0.016936 | 39          | 6   | -4.308475 | 4.686486  | -1.208587 |
| 11          | 6   | -3.082571 | 2.903740  | 0.028396  | 40          | 1   | -6.109748 | -4.013334 | 1.341972  |
| 12          | 6   | -3.159602 | 1.516408  | 0.042352  | 41          | 1   | -4.588772 | -3.667072 | 2.204909  |
| 13          | 78  | 0.800653  | -0.024866 | -0.029468 | 42          | 1   | -5.461490 | -2.359512 | 1.371815  |
| 14          | 16  | 2.427842  | 1.546378  | 0.002524  | 43          | 1   | -5.049506 | -5.800341 | 0.008622  |
| 15          | 6   | 3.913585  | 0.638473  | -0.207070 | 44          | 1   | -3.564471 | -5.529737 | -0.923751 |
| 16          | 6   | 3.901123  | -0.719843 | -0.215585 | 45          | 1   | -3.511560 | -5.560419 | 0.860438  |
| 17          | 16  | 5.405316  | -1.639383 | -0.266237 | 46          | 1   | -6.182810 | -3.969783 | -1.200180 |
| 18          | 6   | 6.266215  | -0.658291 | 1.013855  | 47          | 1   | -5.537126 | -2.314686 | -1.208474 |
| 19          | 6   | 6.656582  | 0.726852  | 0.541076  | 48          | 1   | -4.714002 | -3.590199 | -2.136354 |
| 20          | 16  | 5.368038  | 1.608519  | -0.440873 | 49          | 1   | -5.101603 | 5.385138  | 1.335316  |
| 21          | 16  | 2.409182  | -1.613506 | -0.006200 | 50          | 1   | -4.228348 | 4.110177  | 2.224706  |
| 22          | 6   | -4.306752 | 3.814076  | 0.056798  | 51          | 1   | -3.325829 | 5.336349  | 1.304886  |
| 23          | 6   | -4.399556 | -3.737541 | 0.025094  | 52          | 1   | -6.466156 | 3.714625  | 0.124995  |
| 24          | 1   | 5.595524  | -0.611996 | 1.884187  | 53          | 1   | -5.735286 | 2.375549  | -0.779426 |
| 25          | 1   | 7.167417  | -1.224200 | 1.298797  | 54          | 1   | -5.679530 | 2.392227  | 1.007069  |
| 26          | 1   | 7.527276  | 0.674619  | -0.129195 | 55          | 1   | -5.180255 | 5.359450  | -1.201510 |
| 27          | 1   | 6.916992  | 1.356853  | 1.407550  | 56          | 1   | -3.405915 | 5.311554  | -1.278653 |
| 28          | 1   | 0.331749  | 3.034213  | -0.082044 | 57          | 1   | -4.361194 | 4.067336  | -2.117305 |
| 29          | 1   | -1.623518 | 4.526159  | -0.034270 |             |     |           |           |           |

**Table S29.** Optimised geometry calculated for complex **6** at DFT level [PBE0//cc-pVDZ/LANL08(f)] in DMSO (SCRF IEF-PCM; total charge = 0, spin multiplicity = 1) in orthogonal Cartesian coordinate format ( $Z$  = atomic number).

| Atom number | $Z$ | x         | y         | z         | Atom number | $Z$ | x | y         | z         |
|-------------|-----|-----------|-----------|-----------|-------------|-----|---|-----------|-----------|
| 1           | 6   | -3.178422 | -1.510866 | 0.041001  | 30          | 1   | 1 | -4.134175 | 1.011571  |
| 2           | 6   | -2.020451 | -0.741417 | 0.003173  | 31          | 1   | 1 | -4.142054 | -1.007000 |
| 3           | 7   | -0.791131 | -1.319246 | -0.052633 | 32          | 1   | 1 | -1.694208 | -4.548738 |
| 4           | 6   | -0.722792 | -2.658390 | -0.083197 | 33          | 1   | 1 | 0.277043  | -3.090462 |
| 5           | 6   | -1.844461 | -3.471198 | -0.052443 | 34          | 6   | 6 | -4.113776 | -5.235650 |
| 6           | 6   | -3.122833 | -2.907831 | 0.015750  | 35          | 6   | 6 | -5.163902 | -3.401663 |
| 7           | 6   | -2.011224 | 0.725900  | 0.017471  | 36          | 6   | 6 | -5.270498 | -3.374056 |
| 8           | 7   | -0.777745 | 1.288004  | 0.013488  | 37          | 6   | 6 | -5.625861 | 2.994509  |
| 9           | 6   | -0.692573 | 2.630574  | 0.014570  | 38          | 6   | 6 | -4.285706 | 4.698963  |
| 10          | 6   | -1.803920 | 3.450405  | 0.021090  | 39          | 6   | 6 | -4.293660 | 4.668084  |
| 11          | 6   | -3.094726 | 2.899378  | 0.021756  | 40          | 1   | 1 | -6.093846 | -3.989235 |
| 12          | 6   | -3.166875 | 1.507694  | 0.020293  | 41          | 1   | 1 | -4.560590 | -3.647239 |
| 13          | 78  | 0.797297  | -0.023285 | -0.029732 | 42          | 1   | 1 | -5.438537 | -2.337729 |
| 14          | 16  | 2.434123  | 1.556334  | 0.079579  | 43          | 1   | 1 | -5.063031 | -5.790198 |
| 15          | 6   | 3.926828  | 0.650491  | -0.165550 | 44          | 1   | 1 | -3.588864 | -5.535637 |
| 16          | 6   | 3.916362  | -0.702296 | -0.250762 | 45          | 1   | 1 | -3.511280 | -5.553634 |
| 17          | 16  | 5.423481  | -1.618965 | -0.354688 | 46          | 1   | 1 | -6.202025 | -3.960481 |
| 18          | 6   | 6.311474  | -0.710230 | 0.961162  | 47          | 1   | 1 | -5.546515 | -2.308961 |
| 19          | 6   | 6.698471  | 0.694983  | 0.556697  | 48          | 1   | 1 | -4.745057 | -3.600580 |
| 20          | 16  | 5.381835  | 1.641825  | -0.327410 | 49          | 1   | 1 | -5.164183 | 5.362488  |
| 21          | 16  | 2.419133  | -1.619279 | -0.108618 | 50          | 1   | 1 | -4.303826 | 4.098758  |
| 22          | 6   | -4.325539 | 3.799120  | 0.016808  | 51          | 1   | 1 | -3.387517 | 5.333832  |
| 23          | 6   | -4.403952 | -3.734289 | 0.061379  | 52          | 1   | 1 | -6.481508 | 3.685614  |
| 24          | 1   | 5.660329  | -0.713111 | 1.846831  | 53          | 1   | 1 | -5.720608 | 2.349948  |
| 25          | 1   | 7.216809  | -1.291977 | 1.192160  | 54          | 1   | 1 | -5.710482 | 2.365488  |
| 26          | 1   | 7.548082  | 0.679912  | -0.140446 | 55          | 1   | 1 | -5.171015 | 5.333000  |
| 27          | 1   | 6.985624  | 1.273653  | 1.448489  | 56          | 1   | 1 | -3.393973 | 5.299734  |
| 28          | 1   | 0.313636  | 3.050174  | 0.004631  | 57          | 1   | 1 | -4.319546 | 4.045131  |
| 29          | 1   | -1.644705 | 4.528658  | 0.021205  |             |     |   |           |           |

**Table S30.** Optimised geometry calculated for complex **6** at DFT level [PBE0//cc-pVDZ/LANL08(f)] in DMF (SCRF IEF-PCM; total charge = 0, spin multiplicity = 1) in orthogonal Cartesian coordinate format ( $Z$  = atomic number).

| Atom number | $Z$ | $x$       | $y$       | $z$       | Atom number | $Z$ | $x$       | $y$       | $z$       |
|-------------|-----|-----------|-----------|-----------|-------------|-----|-----------|-----------|-----------|
| 1           | 6   | -3.178359 | -1.510952 | 0.041224  | 30          | 1   | -4.134153 | 1.011698  | 0.015003  |
| 2           | 6   | -2.020421 | -0.741410 | 0.003205  | 31          | 1   | -4.142044 | -1.007209 | 0.096234  |
| 3           | 7   | -0.791075 | -1.319193 | -0.052926 | 32          | 1   | -1.694081 | -4.548707 | -0.080936 |
| 4           | 6   | -0.722722 | -2.658326 | -0.083933 | 33          | 1   | 0.277152  | -3.090275 | -0.134986 |
| 5           | 6   | -1.844356 | -3.471177 | -0.053178 | 34          | 6   | -4.113672 | -5.235740 | 0.031949  |
| 6           | 6   | -3.122740 | -2.907885 | 0.015567  | 35          | 6   | -5.163036 | -3.402622 | 1.356216  |
| 7           | 6   | -2.011188 | 0.725882  | 0.017399  | 36          | 6   | -5.271139 | -3.373422 | -1.155472 |
| 8           | 7   | -0.777670 | 1.287930  | 0.012893  | 37          | 6   | -5.625768 | 2.994823  | 0.031762  |
| 9           | 6   | -0.692459 | 2.630498  | 0.013585  | 38          | 6   | -4.285008 | 4.698987  | 1.263020  |
| 10          | 6   | -1.803766 | 3.450372  | 0.020374  | 39          | 6   | -4.293932 | 4.668435  | -1.250542 |
| 11          | 6   | -3.094616 | 2.899430  | 0.021701  | 40          | 1   | -6.093043 | -3.990086 | 1.401035  |
| 12          | 6   | -3.166817 | 1.507767  | 0.020458  | 41          | 1   | -4.559245 | -3.648822 | 2.243171  |
| 13          | 78  | 0.797326  | -0.023308 | -0.029872 | 42          | 1   | -5.437466 | -2.338677 | 1.413689  |
| 14          | 16  | 2.434028  | 1.556274  | 0.079056  | 43          | 1   | -5.062875 | -5.790374 | 0.067544  |
| 15          | 6   | 3.926668  | 0.650442  | -0.165825 | 44          | 1   | -3.589237 | -5.535104 | -0.888349 |
| 16          | 6   | 3.916213  | -0.702381 | -0.250542 | 45          | 1   | -3.510713 | -5.554296 | 0.896024  |
| 17          | 16  | 5.423385  | -1.618937 | -0.354146 | 46          | 1   | -6.202641 | -3.959887 | -1.133408 |
| 18          | 6   | 6.310820  | -0.709967 | 0.961907  | 47          | 1   | -5.547223 | -2.308329 | -1.164900 |
| 19          | 6   | 6.697769  | 0.695316  | 0.557497  | 48          | 1   | -4.746254 | -3.599228 | -2.096415 |
| 20          | 16  | 5.381753  | 1.641497  | -0.328189 | 49          | 1   | -5.163397 | 5.362629  | 1.269008  |
| 21          | 16  | 2.419099  | -1.619251 | -0.107642 | 50          | 1   | -4.302793 | 4.098698  | 2.185645  |
| 22          | 6   | -4.325364 | 3.799295  | 0.017256  | 51          | 1   | -3.386734 | 5.333743  | 1.284719  |
| 23          | 6   | -4.403840 | -3.734396 | 0.061355  | 52          | 1   | -6.481384 | 3.685967  | 0.030374  |
| 24          | 1   | 5.659286  | -0.712796 | 1.847292  | 53          | 1   | -5.720867 | 2.350316  | -0.855642 |
| 25          | 1   | 7.216121  | -1.291604 | 1.193387  | 54          | 1   | -5.710167 | 2.365797  | 0.931313  |
| 26          | 1   | 7.548027  | 0.680325  | -0.138877 | 55          | 1   | -5.171251 | 5.333410  | -1.265833 |
| 27          | 1   | 6.983971  | 1.274227  | 1.449459  | 56          | 1   | -3.394238 | 5.300053  | -1.294810 |
| 28          | 1   | 0.313798  | 3.049983  | 0.003100  | 57          | 1   | -4.320107 | 4.045645  | -2.157942 |
| 29          | 1   | -1.644494 | 4.528622  | 0.020174  |             |     |           |           |           |

**Table S31.** Selected optimised bond lengths (Å) and angles (°) calculated at the DFT level [PBE0//cc-pVDZ/LANL08(f)] in the gas phase for complexes 1–6; numbering scheme as in Figure S5.

|               | 1      |                | 2      |               | 3      |                | 4      |               | 5      |               | 6      |  |
|---------------|--------|----------------|--------|---------------|--------|----------------|--------|---------------|--------|---------------|--------|--|
| Pt-S1         | 2.261  | Pt-S1          | 2.256  | Pt-S1         | 2.258  | Pt-S1          | 2.254  | Pt-S1         | 2.261  | Pt-S1         | 2.262  |  |
| Pt-S2         | 2.260  | Pt-S2          | 2.256  | Pt-S2         | 2.258  | Pt-S2          | 2.254  | Pt-S2         | 2.260  | Pt-S2         | 2.261  |  |
| Pt-N1         | 2.040  | Pt-N1          | 2.045  | Pt-N1         | 2.048  | Pt-N1          | 2.053  | Pt-N1         | 2.041  | Pt-N1         | 2.041  |  |
| Pt-N2         | 2.040  | Pt-N2          | 2.045  | Pt-N2         | 2.048  | Pt-N2          | 2.053  | Pt-N2         | 2.041  | Pt-N2         | 2.041  |  |
| S1-C11        | 1.752  | S1-C11         | 1.751  | S1-C13        | 1.754  | S1-C13         | 1.752  | S1-C13        | 1.753  | S1-C13        | 1.754  |  |
| S2-C12        | 1.750  | S2-C12         | 1.751  | S2-C14        | 1.752  | S2-C14         | 1.752  | S2-C14        | 1.751  | S2-C14        | 1.752  |  |
| C11-S3        | 1.763  | C11-S3         | 1.766  | C13-S3        | 1.763  | C13-S3         | 1.760  | C13-S3        | 1.764  | C13-S3        | 1.764  |  |
| C12-S4        | 1.763  | C12-S4         | 1.766  | C14-S4        | 1.763  | C14-S4         | 1.766  | C14-S4        | 1.763  | C14-S4        | 1.764  |  |
| S3-C13        | 1.844  | S3-C13         | 1.827  | S3-C15        | 1.844  | S3-C15         | 1.827  | S3-C15        | 1.844  | S3-C15        | 1.844  |  |
| S4-C14        | 1.828  | S4-C15         | 1.827  | S4-C16        | 1.828  | S4-C17         | 1.827  | S4-C16        | 1.828  | S4-C16        | 1.828  |  |
| C11-C12       | 1.359  | C11-C12        | 1.361  | C13-C14       | 1.359  | C13-C14        | 1.361  | C13-C14       | 1.359  | C13-C14       | 1.358  |  |
| C13-C14       | 1.515  | C13-C14        | 1.522  | C15-C16       | 1.515  | C15-C16        | 1.522  | C15-C16       | 1.515  | C15-C16       | 1.515  |  |
|               |        | C14-C15        | 1.522  |               |        | C16-C17        | 1.522  |               |        |               |        |  |
| N1-C5         | 1.363  | N1-C5          | 1.362  | N1-C6         | 1.366  | N1-C6          | 1.366  | N1-C6         | 1.360  | N1-C6         | 1.358  |  |
| N2-C6         | 1.363  | N2-C6          | 1.362  | N2-C7         | 1.366  | N2-C7          | 1.366  | N2-C7         | 1.360  | N2-C7         | 1.362  |  |
| C5-C6         | 1.457  | C5-C6          | 1.458  | C6-C7         | 1.419  | C6-C7          | 1.420  | C6-C7         | 1.458  | C6-C7         | 1.460  |  |
| N1-Pt-S1      | 96.13  | N1-Pt-S1       | 96.44  | N1-Pt-S1      | 95.51  | N1-Pt-S1       | 95.83  | N1-Pt-S1      | 96.20  | N1-Pt-S1      | 96.21  |  |
| S1-Pt-S2      | 88.50  | S1-Pt-S2       | 88.12  | S1-Pt-S2      | 88.93  | S1-Pt-S2       | 88.53  | S1-Pt-S2      | 88.59  | S1-Pt-S2      | 88.64  |  |
| S2-Pt-N2      | 96.21  | S2-Pt-N2       | 96.44  | S2-Pt-N2      | 95.59  | S2-Pt-N2       | 95.83  | S2-Pt-N2      | 96.29  | S2-Pt-N2      | 96.27  |  |
| N1-Pt-N2      | 79.14  | N1-Pt-N2       | 78.90  | N1-Pt-N2      | 79.96  | N1-Pt-N2       | 79.80  | N1-Pt-N2      | 78.91  | N1-Pt-N2      | 78.88  |  |
| N1-Pt-S1-C11  | 172.96 | N1-Pt-S1-C11   | 174.76 | N1-Pt-S1-C13  | 173.10 | N1-Pt-S1-C13   | 174.87 | N1-Pt-S1-C13  | 173.02 | N1-Pt-S1-C13  | 173.03 |  |
| N2-Pt-S2-C12  | 172.71 | N2-Pt-S2-C12   | 174.77 | N2-Pt-S2-C14  | 172.84 | N2-Pt-S2-C14   | 174.88 | N2-Pt-S2-C14  | 172.76 | N2-Pt-S2-C14  | 172.74 |  |
| Pt-S1-C11-S3  | 172.00 | Pt-S1-C11-S3   | 174.25 | Pt-S1-C13-S3  | 172.23 | Pt-S1-C13-S3   | 174.43 | Pt-S1-C13-S3  | 172.11 | Pt-S1-C13-S3  | 172.19 |  |
| Pt-S2-C12-S4  | 179.18 | Pt-S2-C12-S4   | 174.25 | Pt-S2-C14-S4  | 179.39 | Pt-S2-C14-S4   | 174.43 | Pt-S2-C14-S4  | 179.30 | Pt-S2-C14-S4  | 179.38 |  |
| S1-C11-S3-C13 | 140.64 | S1-C11-S3-C13  | 115.51 | S1-C13-S3-C15 | 140.38 | S1-C13-S3-C15  | 115.39 | S1-C13-S3-C15 | 140.38 | S1-C13-S3-C15 | 140.04 |  |
| S2-C12-S4-C14 | 128.53 | S2-C12-S4-C15  | 115.51 | S2-C14-S4-C16 | 128.37 | S2-C14-S4-C17  | 115.39 | S2-C14-S4-C16 | 128.35 | S2-C14-S4-C16 | 128.11 |  |
|               |        | C11-S3-C13-C14 | 81.08  |               |        | C13-S3-C15-C16 | 81.14  |               |        |               |        |  |
|               |        | C12-S4-C15-C14 | 81.07  |               |        | C14-S4-C17-C16 | 81.14  |               |        |               |        |  |



**Table S32.** Selected optimised bond lengths (Å) and angles (°) calculated at the DFT level [PBE0//cc-pVDZ/LANL08(f)] in DMSO (SCRF IEF-PCM) for complexes 1–6; numbering scheme as in Figure S5.

| 1             |        | 2              |        | 3             |        | 4              |        | 5             |        | 6             |        |
|---------------|--------|----------------|--------|---------------|--------|----------------|--------|---------------|--------|---------------|--------|
| Pt-S1         | 2.271  | Pt-S1          | 2.271  | Pt-S1         | 2.273  | Pt-S1          | 2.268  | Pt-S1         | 2.277  | Pt-S1         | 2.277  |
| Pt-S2         | 2.271  | Pt-S2          | 2.271  | Pt-S2         | 2.273  | Pt-S2          | 2.268  | Pt-S2         | 2.277  | Pt-S2         | 2.277  |
| Pt-N1         | 2.054  | Pt-N1          | 2.054  | Pt-N1         | 2.059  | Pt-N1          | 2.062  | Pt-N1         | 2.051  | Pt-N1         | 2.050  |
| Pt-N2         | 2.054  | Pt-N2          | 2.054  | Pt-N2         | 2.059  | Pt-N2          | 2.062  | Pt-N2         | 2.051  | Pt-N2         | 2.050  |
| S1-C11        | 1.761  | S1-C11         | 1.761  | S1-C13        | 1.763  | S1-C13         | 1.761  | S1-C13        | 1.763  | S1-C13        | 1.763  |
| S2-C12        | 1.761  | S2-C12         | 1.761  | S2-C14        | 1.762  | S2-C14         | 1.761  | S2-C14        | 1.761  | S2-C14        | 1.762  |
| C11-S3        | 1.770  | C11-S3         | 1.770  | C13-S3        | 1.768  | C13-S3         | 1.770  | C13-S3        | 1.768  | C13-S3        | 1.768  |
| C12-S4        | 1.770  | C12-S4         | 1.770  | C14-S4        | 1.767  | C14-S4         | 1.770  | C14-S4        | 1.768  | C14-S4        | 1.767  |
| S3-C13        | 1.830  | S3-C13         | 1.830  | S3-C15        | 1.847  | S3-C15         | 1.830  | S3-C15        | 1.847  | S3-C15        | 1.847  |
| S4-C14        | 1.830  | S4-C15         | 1.830  | S4-C16        | 1.829  | S4-C17         | 1.830  | S4-C16        | 1.829  | S4-C16        | 1.829  |
| C11-C12       | 1.358  | C11-C12        | 1.358  | C13-C14       | 1.356  | C13-C14        | 1.358  | C13-C14       | 1.355  | C13-C14       | 1.356  |
| C13-C14       | 1.521  | C13-C14        | 1.520  | C15-C16       | 1.513  | C15-C16        | 1.520  | C15-C16       | 1.513  | C15-C16       | 1.513  |
|               |        | C14-C15        | 1.521  |               |        | C16-C17        | 1.520  |               |        |               |        |
| N1-C5         | 1.359  | N1-C5          | 1.359  | N1-C6         | 1.364  | N1-C6          | 1.364  | N1-C6         | 1.357  | N1-C6         | 1.356  |
| N2-C6         | 1.359  | N2-C6          | 1.359  | N2-C7         | 1.364  | N2-C7          | 1.364  | N2-C7         | 1.357  | N2-C7         | 1.360  |
| C5-C6         | 1.465  | C5-C6          | 1.465  | C6-C7         | 1.423  | C6-C7          | 1.424  | C6-C7         | 1.466  | C6-C7         | 1.467  |
| N1-Pt-S1      | 96.38  | N1-Pt-S1       | 96.38  | N1-Pt-S1      | 95.51  | N1-Pt-S1       | 95.80  | N1-Pt-S1      | 93.17  | N1-Pt-S1      | 96.17  |
| S1-Pt-S2      | 88.12  | S1-Pt-S2       | 88.12  | S1-Pt-S2      | 88.92  | S1-Pt-S2       | 88.51  | S1-Pt-S2      | 88.59  | S1-Pt-S2      | 88.62  |
| S2-Pt-N2      | 96.39  | S2-Pt-N2       | 96.39  | S2-Pt-N2      | 95.57  | S2-Pt-N2       | 95.80  | S2-Pt-N2      | 96.24  | S2-Pt-N2      | 96.22  |
| N1-Pt-N2      | 79.21  | N1-Pt-N2       | 79.11  | N1-Pt-N2      | 80.00  | N1-Pt-N2       | 79.59  | N1-Pt-N2      | 79.02  | N1-Pt-N2      | 79.01  |
| N1-Pt-S1-C11  | 172.40 | N1-Pt-S1-C11   | 176.04 | N1-Pt-S1-C13  | 172.76 | N1-Pt-S1-C13   | 175.59 | N1-Pt-S1-C13  | 175.52 | N1-Pt-S1-C13  | 172.55 |
| N2-Pt-S2-C12  | 174.20 | N2-Pt-S2-C12   | 176.07 | N2-Pt-S2-C14  | 174.37 | N2-Pt-S2-C14   | 175.57 | N2-Pt-S2-C14  | 174.73 | N2-Pt-S2-C14  | 174.86 |
| Pt-S1-C11-S3  | 172.64 | Pt-S1-C11-S3   | 175.41 | Pt-S1-C13-S3  | 172.62 | Pt-S1-C13-S3   | 175.06 | Pt-S1-C13-S3  | 172.77 | Pt-S1-C13-S3  | 172.99 |
| Pt-S2-C12-S4  | 179.47 | Pt-S2-C12-S4   | 175.41 | Pt-S2-C14-S4  | 179.56 | Pt-S2-C14-S4   | 175.06 | Pt-S2-C14-S4  | 179.49 | Pt-S2-C14-S4  | 179.49 |
| S1-C11-S3-C13 | 142.28 | S1-C11-S3-C13  | 116.08 | S1-C13-S3-C15 | 141.90 | S1-C13-S3-C15  | 116.23 | S1-C13-S3-C15 | 142.38 | S1-C13-S3-C15 | 142.18 |
| S2-C12-S4-C14 | 129.73 | S2-C12-S4-C15  | 116.07 | S2-C14-S4-C16 | 129.66 | S2-C14-S4-C17  | 116.23 | S2-C14-S4-C16 | 129.73 | S2-C14-S4-C16 | 129.46 |
|               |        | C11-S3-C13-C14 | 80.76  |               |        | C13-S3-C15-C16 | 80.77  |               |        |               |        |
|               |        | C12-S4-C15-C14 | 80.76  |               |        | C14-S4-C17-C16 | 80.76  |               |        |               |        |

**Table S33.** Selected optimised bond lengths (Å) and angles (°) calculated at the DFT level [PBE0//cc-pVDZ/LANL08(f)] in DMF (SCRF IEF-PCM) for complexes **1–6**; numbering scheme as in Figure S5.

| 1             |        | 2              |        | 3             |        | 4              |        | 5             |         | 6             |         |
|---------------|--------|----------------|--------|---------------|--------|----------------|--------|---------------|---------|---------------|---------|
| Pt-S1         | 2.276  | Pt-S1          | 2.271  | Pt-S1         | 2.273  | Pt-S1          | 2.268  | Pt-S1         | 2.277   | Pt-S1         | 2.277   |
| Pt-S2         | 2.276  | Pt-S2          | 2.271  | Pt-S2         | 2.272  | Pt-S2          | 2.268  | Pt-S2         | 2.276   | Pt-S2         | 2.277   |
| Pt-N1         | 2.051  | Pt-N1          | 2.054  | Pt-N1         | 2.059  | Pt-N1          | 2.062  | Pt-N1         | 2.051   | Pt-N1         | 2.050   |
| Pt-N2         | 2.051  | Pt-N2          | 2.054  | Pt-N2         | 2.059  | Pt-N2          | 2.062  | Pt-N2         | 2.051   | Pt-N2         | 2.050   |
| S1-C11        | 1.763  | S1-C11         | 1.760  | S1-C13        | 1.763  | S1-C13         | 1.761  | S1-C13        | 1.763   | S1-C13        | 1.763   |
| S2-C12        | 1.761  | S2-C12         | 1.760  | S2-C14        | 1.761  | S2-C14         | 1.761  | S2-C14        | 1.761   | S2-C14        | 1.761   |
| C11-S3        | 1.768  | C11-S3         | 1.770  | C13-S3        | 1.768  | C13-S3         | 1.770  | C13-S3        | 1.768   | C13-S3        | 1.768   |
| C12-S4        | 1.767  | C12-S4         | 1.770  | C14-S4        | 1.767  | C14-S4         | 1.770  | C14-S4        | 1.767   | C14-S4        | 1.767   |
| S3-C13        | 1.847  | S3-C13         | 1.830  | S3-C15        | 1.847  | S3-C15         | 1.830  | S3-C15        | 1.847   | S3-C15        | 1.847   |
| S4-C14        | 1.829  | S4-C15         | 1.830  | S4-C16        | 1.829  | S4-C17         | 1.830  | S4-C16        | 1.829   | S4-C16        | 1.826   |
| C11-C12       | 1.355  | C11-C12        | 1.358  | C13-C14       | 1.356  | C13-C14        | 1.358  | C13-C14       | 1.355   | C13-C14       | 1.355   |
| C13-C14       | 1.513  | C13-C14        | 1.520  | C15-C16       | 1.513  | C15-C16        | 1.520  | C15-C16       | 1.513   | C15-C16       | 1.513   |
|               |        | C14-C15        | 1.521  |               |        | C16-C17        | 1.520  |               |         |               |         |
| N1-C5         | 1.359  | N1-C5          | 1.359  | N1-C6         | 1.364  | N1-C6          | 1.364  | N1-C6         | 1.357   | N1-C6         | 1.356   |
| N2-C6         | 1.359  | N2-C6          | 1.359  | N2-C7         | 1.364  | N2-C7          | 1.364  | N2-C7         | 1.357   | N2-C7         | 1.359   |
| C5-C6         | 1.465  | C5-C6          | 1.465  | C6-C7         | 1.423  | C6-C7          | 1.423  | C6-C7         | 1.466   | C6-C7         | 1.467   |
| N1-Pt-S1      | 96.11  | N1-Pt-S1       | 96.39  | N1-Pt-S1      | 95.510 | N1-Pt-S1       | 95.80  | N1-Pt-S1      | 96.170  | N1-Pt-S1      | 96.17   |
| S1-Pt-S2      | 88.53  | S1-Pt-S2       | 88.12  | S1-Pt-S2      | 88.92  | S1-Pt-S2       | 88.50  | S1-Pt-S2      | 88.590  | S1-Pt-S2      | 88.62   |
| S2-Pt-N2      | 96.18  | S2-Pt-N2       | 96.39  | S2-Pt-N2      | 95.57  | S2-Pt-N2       | 95.80  | S2-Pt-N2      | 96.240  | S2-Pt-N2      | 96.22   |
| N1-Pt-N2      | 79.21  | N1-Pt-N2       | 79.10  | N1-Pt-N2      | 80.00  | N1-Pt-N2       | 79.89  | N1-Pt-N2      | 79.010  | N1-Pt-N2      | 79.00   |
| N1-Pt-S1-C11  | 172.43 | N1-Pt-S1-C11   | 176.02 | N1-Pt-S1-C13  | 172.76 | N1-Pt-S1-C13   | 175.57 | N1-Pt-S1-C13  | 172.550 | N1-Pt-S1-C13  | 172.550 |
| N2-Pt-S2-C12  | 174.60 | N2-Pt-S2-C12   | 176.05 | N2-Pt-S2-C14  | 174.34 | N2-Pt-S2-C14   | 175.57 | N2-Pt-S2-C14  | 174.69  | N2-Pt-S2-C14  | 174.83  |
| Pt-S1-C11-S3  | 172.62 | Pt-S1-C11-S3   | 175.40 | Pt-S1-C13-S3  | 172.60 | Pt-S1-C13-S3   | 175.06 | Pt-S1-C13-S3  | 172.75  | Pt-S1-C13-S3  | 172.98  |
| Pt-S2-C12-S4  | 179.48 | Pt-S2-C12-S4   | 175.39 | Pt-S2-C14-S4  | 179.57 | Pt-S2-C14-S4   | 175.06 | Pt-S2-C14-S4  | 179.51  | Pt-S2-C14-S4  | 179.47  |
| S1-C11-S3-C13 | 142.23 | S1-C11-S3-C13  | 116.07 | S1-C13-S3-C15 | 141.91 | S1-C13-S3-C15  | 116.23 | S1-C13-S3-C15 | 142.30  | S1-C13-S3-C15 | 142.14  |
| S2-C12-S4-C14 | 129.70 | S2-C12-S4-C15  | 116.06 | S2-C14-S4-C16 | 129.63 | S2-C14-S4-C17  | 116.22 | S2-C14-S4-C16 | 129.70  | S2-C14-S4-C16 | 129.43  |
|               |        | C11-S3-C13-C14 | 80.76  |               |        | C13-S3-C15-C16 | 80.76  |               |         |               |         |
|               |        | C12-S4-C15-C14 | 80.77  |               |        | C14-S4-C17-C16 | 80.77  |               |         |               |         |

**Table S34.** Selected optimised bond lengths (Å) and angles (°) calculated at the DFT level [PBE0//cc-pVDZ/LANL08(f)] in different solvents (SCRF IEF-PCM) for complex **5**; numbering scheme as in Figure S5.

|               | CH <sub>3</sub> CN | DMSO   | Acetone | DMF    | DCM    | CHCl <sub>3</sub> | THF    | Toluene |
|---------------|--------------------|--------|---------|--------|--------|-------------------|--------|---------|
| Pt-S1         | 2.277              | 2.277  | 2.276   | 2.277  | 2.275  | 2.272             | 2.274  | 2.268   |
| Pt-S2         | 2.276              | 2.277  | 2.276   | 2.276  | 2.274  | 2.272             | 2.274  | 2.267   |
| Pt-N1         | 2.051              | 2.051  | 2.051   | 2.051  | 2.050  | 2.049             | 2.050  | 2.047   |
| Pt-N2         | 2.051              | 2.051  | 2.051   | 2.051  | 2.050  | 2.049             | 2.050  | 2.047   |
| S1-C11        | 1.763              | 1.763  | 1.763   | 1.763  | 1.762  | 1.760             | 1.761  | 1.785   |
| S2-C12        | 1.761              | 1.761  | 1.761   | 1.761  | 1.760  | 1.758             | 1.759  | 1.756   |
| C11-S3        | 1.768              | 1.768  | 1.768   | 1.768  | 1.767  | 1.767             | 1.767  | 1.766   |
| C12-S4        | 1.767              | 1.768  | 1.767   | 1.767  | 1.766  | 1.766             | 1.766  | 1.765   |
| S3-C13        | 1.847              | 1.847  | 1.847   | 1.847  | 1.847  | 1.846             | 1.847  | 1.845   |
| S4-C14        | 1.829              | 1.829  | 1.829   | 1.829  | 1.829  | 1.829             | 1.829  | 1.829   |
| C11-C12       | 1.355              | 1.355  | 1.356   | 1.355  | 1.356  | 1.356             | 1.356  | 1.357   |
| C13-C14       | 1.513              | 1.513  | 1.513   | 1.513  | 1.513  | 1.514             | 1.513  | 1.514   |
| N1-C5         | 1.357              | 1.357  | 1.357   | 1.357  | 1.357  | 1.357             | 1.357  | 1.358   |
| N2-C6         | 1.357              | 1.357  | 1.357   | 1.357  | 1.357  | 1.357             | 1.357  | 1.358   |
| C5-C6         | 1.466              | 1.466  | 1.466   | 1.466  | 1.466  | 1.465             | 1.466  | 1.463   |
| N1-Pt-S1      | 96.17              | 93.17  | 96.17   | 96.17  | 96.18  | 96.19             | 96.18  | 96.20   |
| S1-Pt-S2      | 88.59              | 88.59  | 88.59   | 88.59  | 88.59  | 88.60             | 88.59  | 88.61   |
| S2-Pt-N2      | 96.24              | 96.24  | 96.24   | 96.24  | 96.25  | 96.27             | 96.26  | 96.27   |
| N1-Pt-N2      | 79.01              | 79.02  | 79.00   | 79.01  | 78.98  | 78.94             | 78.96  | 78.90   |
| N1-Pt-S1-C11  | 172.55             | 175.52 | 172.63  | 172.55 | 172.77 | 172.79            | 172.76 | 172.86  |
| N2-Pt-S2-C12  | 174.68             | 174.73 | 174.50  | 174.69 | 174.16 | 173.87            | 174.07 | 173.46  |
| Pt-S1-C11-S3  | 172.74             | 172.77 | 172.66  | 172.75 | 172.49 | 172.41            | 172.46 | 172.35  |
| Pt-S2-C12-S4  | 179.51             | 179.49 | 179.57  | 179.51 | 179.68 | 179.66            | 179.64 | 179.58  |
| S1-C11-S3-C13 | 142.28             | 142.38 | 141.93  | 142.30 | 141.20 | 140.66            | 141.13 | 140.14  |
| S2-C12-S4-C14 | 129.70             | 129.73 | 129.55  | 129.70 | 129.23 | 128.85            | 129.15 | 128.39  |

**Table S35.** Frontier molecular orbital composition (%) calculated at the DFT level [PBE0//cc-pVDZ/LANL08(f)] at the optimised geometry in the gas phase for complexes **1–6** in terms of diimine N<sup>N</sup>, 1,2-dithiolene ligand S<sup>S</sup>, and platinum atom.

|          |      | N <sup>N</sup> | S <sup>S</sup> | Pt |
|----------|------|----------------|----------------|----|
| <b>1</b> | HOMO | 12             | 82             | 6  |
|          | LUMO | 85             | 10             | 5  |
| <b>2</b> | HOMO | 13             | 79             | 8  |
|          | LUMO | 86             | 9              | 5  |
| <b>3</b> | HOMO | 12             | 82             | 6  |
|          | LUMO | 86             | 9              | 5  |
| <b>4</b> | HOMO | 13             | 79             | 8  |
|          | LUMO | 86             | 9              | 5  |
| <b>5</b> | HOMO | 12             | 82             | 6  |
|          | LUMO | 86             | 9              | 5  |
| <b>6</b> | HOMO | 12             | 82             | 6  |
|          | LUMO | 87             | 8              | 5  |

**Table S36.** Selected natural charges on the diimine N<sup>N</sup>, 1,2-dithiolene ligand S<sup>S</sup>, and platinum atom (*e*) calculated at the DFT level [PBE0//cc-pVDZ/LANL08(f)] at the optimised geometry in the gas phase for complexes **1–6**.

|          | N <sup>N</sup> | S <sup>S</sup> | Pt    |
|----------|----------------|----------------|-------|
| <b>1</b> | 0.285          | −0.319         | 0.034 |
| <b>2</b> | 0.307          | −0.338         | 0.031 |
| <b>3</b> | 0.322          | −0.351         | 0.029 |
| <b>4</b> | 0.289          | −0.310         | 0.022 |
| <b>5</b> | 0.292          | −0.321         | 0.029 |
| <b>6</b> | 0.295          | −0.312         | 0.017 |

**Table S37.** Eigenvalues of Kohn-Sham HOMO and LUMO and HOMO-LUMO energy gap (eV) calculated at the DFT level [PBE0//cc-pVDZ/LANL08(f)] in the gas phase, DMSO, and DMF (SCRF IEF-PCM) for complexes **1–6**.

|          | Gas    |        |                               | DMSO   |        |                               | DMF    |        |                               |
|----------|--------|--------|-------------------------------|--------|--------|-------------------------------|--------|--------|-------------------------------|
|          | HOMO   | LUMO   | $\Delta E_{\text{HOMO-LUMO}}$ | HOMO   | LUMO   | $\Delta E_{\text{HOMO-LUMO}}$ | HOMO   | LUMO   | $\Delta E_{\text{HOMO-LUMO}}$ |
| <b>1</b> | -4.534 | -2.629 | 1.905                         | -5.123 | -2.521 | 2.602                         | -5.114 | -2.521 | 2.593                         |
| <b>2</b> | -4.670 | -2.622 | 2.048                         | -5.251 | -2.509 | 2.742                         | -5.242 | -2.510 | 2.732                         |
| <b>3</b> | -4.505 | -2.592 | 1.913                         | -5.118 | -2.496 | 2.620                         | -5.110 | -2.496 | 2.614                         |
| <b>4</b> | -4.639 | -2.585 | 2.054                         | -5.242 | -2.484 | 2.758                         | -5.234 | -2.484 | 2.750                         |
| <b>5</b> | -4.410 | -2.497 | 1.913                         | -5.086 | -2.434 | 2.652                         | -5.077 | -2.434 | 2.643                         |
| <b>6</b> | -4.351 | -2.391 | 1.960                         | -5.086 | -2.390 | 2.696                         | -5.234 | -2.484 | 2.750                         |

**Table S38.** Eigenvalues of Kohn-Sham HOMO and LUMO and HOMO-LUMO energy gap (eV) calculated at the DFT level level [PBE0//cc-pVDZ/LANL08(f)] in different solvents (SCRF IEF-PCM) for complex **5**.

|                    | HOMO   | LUMO   | $\Delta E_{\text{HOMO-LUMO}}$ |
|--------------------|--------|--------|-------------------------------|
| CH <sub>3</sub> CN | -5.075 | -2.434 | 2.641                         |
| DMSO               | -5.086 | -2.434 | 2.652                         |
| Acetone            | -5.044 | -2.434 | 2.610                         |
| DMF                | -5.077 | -2.434 | 2.643                         |
| DCM                | -4.957 | -2.436 | 2.521                         |
| CHCl <sub>3</sub>  | -4.840 | -2.441 | 2.399                         |
| THF                | -5.077 | -2.434 | 2.643                         |
| Toluene            | -4.957 | -2.436 | 2.521                         |

**Table S39.** Energy  $E$  (eV), wavelength  $\lambda$  (nm), and oscillator strength  $f$  of the lowest energy electronic transition (corresponding to the HOMO→LUMO mono-electronic excitation) calculated at the DFT level [PBE0//cc-pVDZ/LANL08(f)] in the gas phase, DMSO, and DMF (SCRF IEF-PCM for complexes **1–6**).

|          | Gas   |           |       | DMSO  |           |       | DMF   |           |       |
|----------|-------|-----------|-------|-------|-----------|-------|-------|-----------|-------|
|          | $E$   | $\lambda$ | $f$   | $E$   | $\lambda$ | $f$   | $E$   | $\lambda$ | $f$   |
| <b>1</b> | 1.519 | 816       | 0.166 | 2.000 | 620       | 0.152 | 1.992 | 622       | 0.153 |
| <b>2</b> | 1.635 | 758       | 0.174 | 2.118 | 585       | 0.170 | 2.110 | 588       | 0.172 |
| <b>3</b> | 1.509 | 822       | 0.162 | 2.015 | 615       | 0.154 | 2.007 | 618       | 0.155 |
| <b>4</b> | 1.625 | 763       | 0.174 | 2.131 | 582       | 0.174 | 2.123 | 584       | 0.176 |
| <b>5</b> | 1.519 | 816       | 0.177 | 2.049 | 605       | 0.162 | 2.040 | 608       | 0.163 |
| <b>6</b> | 1.542 | 804       | 0.183 | 2.085 | 595       | 0.171 | 2.077 | 597       | 0.172 |



**Table S40.** Energy  $E$  (eV), wavelength  $\lambda$  (nm), and oscillator strength  $f$  of the lowest energy electronic transition (corresponding to the HOMO $\rightarrow$ LUMO mono-electronic excitation) calculated at the DFT level [PBE0//cc-pVDZ/LANL08(f)] in different solvents (SCRF IEF-PCM) for complex **5**.

|                    | $E$   | $\lambda$ | $f$   |
|--------------------|-------|-----------|-------|
| CH <sub>3</sub> CN | 2.044 | 607       | 0.157 |
| DMSO               | 2.049 | 605       | 0.162 |
| Acetone            | 2.045 | 615       | 0.160 |
| DMF                | 2.040 | 608       | 0.163 |
| DCM                | 1.932 | 642       | 0.169 |
| CHCl <sub>3</sub>  | 1.826 | 679       | 0.179 |
| THF                | 1.907 | 650       | 0.170 |
| Toluene            | 1.663 | 746       | 0.199 |

**Table S41.** Real (Re) and imaginary (Im) parts of second hyperpolarizability  $\gamma$  ( $\times 10^{-31}$  esu) of complexes **1–6**, under 532 nm, 35 ps and 4 ns laser excitation.

|          | 35 ps           |             | 4 ns              |                   |
|----------|-----------------|-------------|-------------------|-------------------|
|          | Re $\gamma$     | Im $\gamma$ | Re $\gamma$       | Im $\gamma$       |
| <b>1</b> | 1.24 $\pm$ 0.02 | -           | -(25.5 $\pm$ 0.8) | -(12 $\pm$ 0.6)   |
| <b>2</b> | 1.70 $\pm$ 0.04 | -           | +(115 $\pm$ 8)    | -(148 $\pm$ 28)   |
| <b>3</b> | 2.5 $\pm$ 0.1   | -           | -(64 $\pm$ 2)     | -31 $\pm$ 2       |
| <b>4</b> | 3.36 $\pm$ 0.01 | -           | -(169 $\pm$ 6)    | -86 $\pm$ 25      |
| <b>5</b> | 2.0 $\pm$ 0.1   | -           | -(31.4 $\pm$ 0.5) | -(16.3 $\pm$ 2.0) |
| <b>6</b> | 2.9 $\pm$ 0.1   | -           | -(67 $\pm$ 10)    | -(38 $\pm$ 2)     |

**Table S42.** Components of the dipole moment (Debye), linear polarizability ( $\alpha$ ), first hyperpolarizability ( $\beta$ ), and second hyperpolarizability ( $\gamma$ ) in a.u., and total values for  $\alpha$ ,  $\beta$ , and  $\gamma$  in a.u. and esu calculated at the DFT level [PBE0//cc-pVDZ/LANL08(f)] for complex **1** in its input orientation (see below) in DMF (SCRF IEF-PCM).

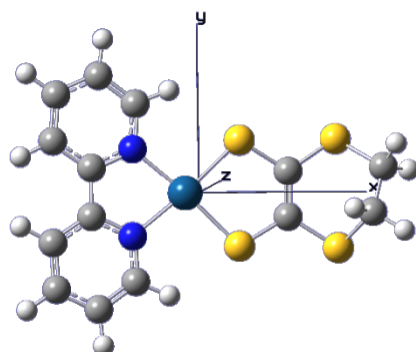

| Dipole moment |         | Linear polarizability            |         | First hyperpolarizability       |                      | Second hyperpolarizability       |                      |
|---------------|---------|----------------------------------|---------|---------------------------------|----------------------|----------------------------------|----------------------|
| $\mu_x$       | -15.136 | $\alpha_{xx}$                    | 654.243 | $\beta_{xxx}$                   | $-2.757 \times 10^4$ | $\gamma_{xxxx}$                  | $8.129 \times 10^6$  |
| $\mu_y$       | 0.004   | $\alpha_{yy}$                    | 479.634 | $\beta_{xxy}$                   | $2.008 \times 10^2$  | $\gamma_{yyyy}$                  | $3.482 \times 10^5$  |
| $\mu_z$       | 2.423   | $\alpha_{zz}$                    | 190.459 | $\beta_{xyy}$                   | $-2.556 \times 10^3$ | $\gamma_{zzzz}$                  | $2.068 \times 10^4$  |
| $\mu_{tot}$   | 15.328  | $\alpha_{tot}$                   | 441.445 | $\beta_{yyy}$                   | $7.046 \times 10^1$  | $\gamma_{xxyy}$                  | $6.095 \times 10^5$  |
|               |         | $\alpha$ (esu) $\times 10^{-24}$ | 65.334  | $\beta_{xxz}$                   | $4.620 \times 10^2$  | $\gamma_{yyzz}$                  | $6.071 \times 10^1$  |
|               |         |                                  |         | $\beta_{xyz}$                   | -3.036               | $\gamma_{xxzz}$                  | $-2.085 \times 10^4$ |
|               |         |                                  |         | $\beta_{yyz}$                   | $3.496 \times 10^1$  | $\gamma_{tot}$                   | $1.935 \times 10^6$  |
|               |         |                                  |         | $\beta_{xzz}$                   | $-2.909 \times 10^1$ | $\gamma$ (esu) $\times 10^{-36}$ | 974.6                |
|               |         |                                  |         | $\beta_{yzz}$                   | $1.826 \times 10^1$  |                                  |                      |
|               |         |                                  |         | $\beta_{zzz}$                   | $1.253 \times 10^2$  |                                  |                      |
|               |         |                                  |         | $\beta_{tot}$                   | $3.017 \times 10^4$  |                                  |                      |
|               |         |                                  |         | $\beta$ (esu) $\times 10^{-30}$ | 260.7                |                                  |                      |

**Table S43.** Components of the dipole moment (Debye), linear polarizability ( $\alpha$ ), first hyperpolarizability ( $\beta$ ), and second hyperpolarizability ( $\gamma$ ) in a.u., and total values for  $\alpha$ ,  $\beta$ , and  $\gamma$  in a.u. and esu calculated at the DFT level [PBE0//cc-pVDZ/LANL08(f)] for complex **1** in the dipole orientation in DMF (SCRF IEF-PCM).

| Dipole moment |        | Linear polarizability            |         | First hyperpolarizability       |                      | Second hyperpolarizability       |                     |
|---------------|--------|----------------------------------|---------|---------------------------------|----------------------|----------------------------------|---------------------|
| $\mu_x$       | 0.000  | $\alpha_{xx}$                    | 202.566 | $\beta_{xxx}$                   | $3.246 \times 10^1$  | $\gamma_{xxxx}$                  | $2.186 \times 10^4$ |
| $\mu_y$       | 0.000  | $\alpha_{yy}$                    | 479.634 | $\beta_{xxy}$                   | $2.154 \times 10^1$  | $\gamma_{yyyy}$                  | $3.482 \times 10^5$ |
| $\mu_z$       | 15.328 | $\alpha_{zz}$                    | 642.136 | $\beta_{xyy}$                   | $-3.695 \times 10^2$ | $\gamma_{zzzz}$                  | $7.802 \times 10^6$ |
| $\mu_{tot}$   | 15.328 | $\alpha_{tot}$                   | 441.445 | $\beta_{yyy}$                   | $6.868 \times 10^1$  | $\gamma_{xxyy}$                  | $1.339 \times 10^4$ |
|               |        | $\alpha$ (esu) $\times 10^{-24}$ | 65.334  | $\beta_{xxz}$                   | $5.857 \times 10^2$  | $\gamma_{yyzz}$                  | $5.968 \times 10^5$ |
|               |        |                                  |         | $\beta_{xyz}$                   | $-2.425 \times 10^1$ | $\gamma_{xxzz}$                  | $1.420 \times 10^5$ |
|               |        |                                  |         | $\beta_{yyz}$                   | $2.529 \times 10^3$  | $\gamma_{tot}$                   | $1.935 \times 10^6$ |
|               |        |                                  |         | $\beta_{xzz}$                   | $-3.816 \times 10^3$ | $\gamma$ (esu) $\times 10^{-36}$ | 974.7               |
|               |        |                                  |         | $\beta_{yzz}$                   | $1.923 \times 10^2$  |                                  |                     |
|               |        |                                  |         | $\beta_{zzz}$                   | $2.676 \times 10^4$  |                                  |                     |
|               |        |                                  |         | $\beta_{tot}$                   | $3.017 \times 10^4$  |                                  |                     |
|               |        |                                  |         | $\beta$ (esu) $\times 10^{-30}$ | 260.7                |                                  |                     |

**Table S44.** Components of the dipole moment (Debye), linear polarizability ( $\alpha$ ), first hyperpolarizability ( $\beta$ ), and second hyperpolarizability ( $\gamma$ ) in a.u., and total values for  $\alpha$ ,  $\beta$ , and  $\gamma$  in a.u. and esu calculated at the DFT level [PBE0//cc-pVDZ/LANL08(f)] for complex **2** in its input orientation (see below) in DMF (SCRF IEF-PCM).

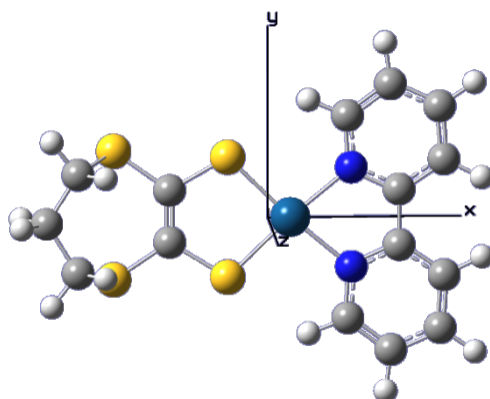

| Dipole moment |        | Linear polarizability            |         | First hyperpolarizability       |                        | Second hyperpolarizability       |                      |
|---------------|--------|----------------------------------|---------|---------------------------------|------------------------|----------------------------------|----------------------|
| $\mu_x$       | 15.104 | $\alpha_{xx}$                    | 673.149 | $\beta_{xxx}$                   | $2.410 \times 10^4$    | $\gamma_{xxxx}$                  | $6.285 \times 10^6$  |
| $\mu_y$       | 0.001  | $\alpha_{yy}$                    | 493.141 | $\beta_{xxy}$                   | $3.929 \times 10^{-1}$ | $\gamma_{yyyy}$                  | $3.483 \times 10^5$  |
| $\mu_z$       | 4.060  | $\alpha_{zz}$                    | 214.243 | $\beta_{xyy}$                   | $2.240 \times 10^3$    | $\gamma_{zzzz}$                  | $2.398 \times 10^4$  |
| $\mu_{tot}$   | 15.640 | $\alpha_{tot}$                   | 460.178 | $\beta_{yyy}$                   | $1.628 \times 10^{-1}$ | $\gamma_{xxyy}$                  | $5.858 \times 10^5$  |
|               |        | $\alpha$ (esu) $\times 10^{-24}$ | 68.106  | $\beta_{xxz}$                   | $1.307 \times 10^3$    | $\gamma_{yyzz}$                  | $9.104 \times 10^2$  |
|               |        |                                  |         | $\beta_{xyz}$                   | $1.324 \times 10^{-1}$ | $\gamma_{xzzz}$                  | $-4.571 \times 10^3$ |
|               |        |                                  |         | $\beta_{yyz}$                   | $1.476 \times 10^2$    | $\gamma_{tot}$                   | $1.564 \times 10^6$  |
|               |        |                                  |         | $\beta_{xzz}$                   | $2.781 \times 10^1$    | $\gamma$ (esu) $\times 10^{-36}$ | 787.9                |
|               |        |                                  |         | $\beta_{yzz}$                   | $4.081 \times 10^{-2}$ |                                  |                      |
|               |        |                                  |         | $\beta_{zzz}$                   | $1.738 \times 10^2$    |                                  |                      |
|               |        |                                  |         | $\beta_{tot}$                   | $2.641 \times 10^4$    |                                  |                      |
|               |        |                                  |         | $\beta$ (esu) $\times 10^{-30}$ | 228.2                  |                                  |                      |

**Table S45.** Components of the dipole moment (Debye), linear polarizability ( $\alpha$ ), first hyperpolarizability ( $\beta$ ), and second hyperpolarizability ( $\gamma$ ) in a.u., and total values for  $\alpha$ ,  $\beta$ , and  $\gamma$  in a.u. and esu calculated at the DFT level [PBE0//cc-pVDZ/LANL08(f)] for complex **2** in the dipole orientation in DMF (SCRF IEF-PCM).

| Dipole moment |        | Linear polarizability            |         | First hyperpolarizability       |                         | Second hyperpolarizability       |                     |
|---------------|--------|----------------------------------|---------|---------------------------------|-------------------------|----------------------------------|---------------------|
| $\mu_x$       | 0.000  | $\alpha_{xx}$                    | 243.749 | $\beta_{xxx}$                   | $3.004 \times 10^1$     | $\gamma_{xxxx}$                  | $3.987 \times 10^4$ |
| $\mu_y$       | 0.000  | $\alpha_{yy}$                    | 493.141 | $\beta_{xxy}$                   | $-1.375 \times 10^{-1}$ | $\gamma_{yyyy}$                  | $3.483 \times 10^5$ |
| $\mu_z$       | 15.640 | $\alpha_{zz}$                    | 643.643 | $\beta_{xyy}$                   | $4.389 \times 10^2$     | $\gamma_{zzzz}$                  | $5.716 \times 10^6$ |
| $\mu_{tot}$   | 15.640 | $\alpha_{tot}$                   | 460.178 | $\beta_{yyy}$                   | $-2.910 \times 10^{-1}$ | $\gamma_{xxyy}$                  | $2.945 \times 10^4$ |
|               |        | $\alpha$ (esu) $\times 10^{-24}$ | 68.106  | $\beta_{xxz}$                   | $1.022 \times 10^3$     | $\gamma_{yyzz}$                  | $5.576 \times 10^5$ |
|               |        |                                  |         | $\beta_{xyz}$                   | $-4.536 \times 10^{-1}$ | $\gamma_{xzzz}$                  | $2.719 \times 10^5$ |
|               |        |                                  |         | $\beta_{yyz}$                   | $2.202 \times 10^3$     | $\gamma_{tot}$                   | $1.565 \times 10^6$ |
|               |        |                                  |         | $\beta_{xzz}$                   | $4.802 \times 10^3$     | $\gamma$ (esu) $\times 10^{-36}$ | 788.0               |
|               |        |                                  |         | $\beta_{yzz}$                   | $-7.466 \times 10^{-1}$ |                                  |                     |
|               |        |                                  |         | $\beta_{zzz}$                   | $2.266 \times 10^4$     |                                  |                     |
|               |        |                                  |         | $\beta_{tot}$                   | $2.641 \times 10^4$     |                                  |                     |
|               |        |                                  |         | $\beta$ (esu) $\times 10^{-30}$ | 228.2                   |                                  |                     |

**Table S46.** Components of the dipole moment (Debye), linear polarizability ( $\alpha$ ), first hyperpolarizability ( $\beta$ ), and second hyperpolarizability ( $\gamma$ ) in a.u., and total values for  $\alpha$ ,  $\beta$ , and  $\gamma$  in a.u. and esu calculated at the DFT level [PBE0//cc-pVDZ/LANL08(f)] for complex **3** in its input orientation (see below) in DMF (SCRF IEF-PCM).

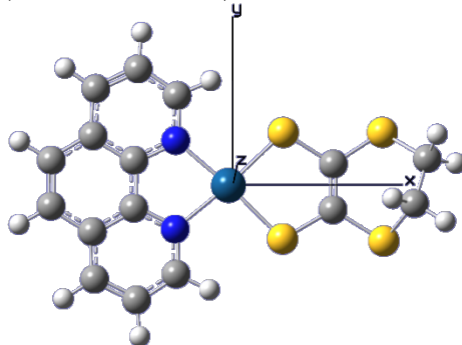

| Dipole moment |         | Linear polarizability            |         | First hyperpolarizability       |                      | Second hyperpolarizability       |                      |
|---------------|---------|----------------------------------|---------|---------------------------------|----------------------|----------------------------------|----------------------|
| $\mu_x$       | -15.660 | $\alpha_{xx}$                    | 710.527 | $\beta_{xxx}$                   | $-2.852 \times 10^4$ | $\gamma_{xxxx}$                  | $8.773 \times 10^6$  |
| $\mu_y$       | 0.010   | $\alpha_{yy}$                    | 535.266 | $\beta_{xxy}$                   | $2.526 \times 10^2$  | $\gamma_{yyyy}$                  | $2.687 \times 10^5$  |
| $\mu_z$       | 2.404   | $\alpha_{zz}$                    | 197.330 | $\beta_{xyy}$                   | $-3.443 \times 10^3$ | $\gamma_{zzzz}$                  | $2.068 \times 10^4$  |
| $\mu_{tot}$   | 15.844  | $\alpha_{tot}$                   | 481.041 | $\beta_{yyy}$                   | $7.654 \times 10^1$  | $\gamma_{xxyy}$                  | $9.330 \times 10^5$  |
|               |         | $\alpha$ (esu) $\times 10^{-24}$ | 71.194  | $\beta_{xxz}$                   | $3.913 \times 10^2$  | $\gamma_{yyzz}$                  | $-1.945 \times 10^3$ |
|               |         |                                  |         | $\beta_{xyz}$                   | $-2.138 \times 10^1$ | $\gamma_{xxzz}$                  | $-2.263 \times 10^4$ |
|               |         |                                  |         | $\beta_{yyz}$                   | $3.085 \times 10^1$  | $\gamma_{tot}$                   | $2.176 \times 10^6$  |
|               |         |                                  |         | $\beta_{xzz}$                   | $-1.814 \times 10^1$ | $\gamma$ (esu) $\times 10^{-36}$ | 1096                 |
|               |         |                                  |         | $\beta_{yzz}$                   | $2.011 \times 10^1$  |                                  |                      |
|               |         |                                  |         | $\beta_{zzz}$                   | $1.257 \times 10^2$  |                                  |                      |
|               |         |                                  |         | $\beta_{tot}$                   | $3.199 \times 10^4$  |                                  |                      |
|               |         |                                  |         | $\beta$ (esu) $\times 10^{-30}$ | 276.4                |                                  |                      |

**Table S47.** Components of the dipole moment (Debye), linear polarizability ( $\alpha$ ), first hyperpolarizability ( $\beta$ ), and second hyperpolarizability ( $\gamma$ ) in a.u., and total values for  $\alpha$ ,  $\beta$ , and  $\gamma$  in a.u. and esu calculated at the DFT level [PBE0//cc-pVDZ/LANL08(f)] for complex **3** in the dipole orientation in DMF (SCRF IEF-PCM).

| Dipole moment |        | Linear polarizability            |         | First hyperpolarizability       |                      | Second hyperpolarizability       |                     |
|---------------|--------|----------------------------------|---------|---------------------------------|----------------------|----------------------------------|---------------------|
| $\mu_x$       | 0.000  | $\alpha_{xx}$                    | 209.877 | $\beta_{xxx}$                   | $4.044 \times 10^1$  | $\gamma_{xxxx}$                  | $2.176 \times 10^4$ |
| $\mu_y$       | 0.000  | $\alpha_{yy}$                    | 535.265 | $\beta_{xxy}$                   | $1.814 \times 10^1$  | $\gamma_{yyyy}$                  | $2.686 \times 10^5$ |
| $\mu_z$       | 15.844 | $\alpha_{zz}$                    | 697.981 | $\beta_{xyy}$                   | $-4.920 \times 10^2$ | $\gamma_{zzzz}$                  | $8.436 \times 10^6$ |
| $\mu_{tot}$   | 15.844 | $\alpha_{tot}$                   | 481.041 | $\beta_{yyy}$                   | $7.091 \times 10^1$  | $\gamma_{xxyy}$                  | $1.707 \times 10^4$ |
|               |        | $\alpha$ (esu) $\times 10^{-24}$ | 71.194  | $\beta_{xxz}$                   | $5.698 \times 10^2$  | $\gamma_{yyzz}$                  | $9.154 \times 10^5$ |
|               |        |                                  |         | $\beta_{xyz}$                   | $-1.083 \times 10^1$ | $\gamma_{xxzz}$                  | $1.455 \times 10^5$ |
|               |        |                                  |         | $\beta_{yyz}$                   | $3.408 \times 10^3$  | $\gamma_{tot}$                   | $2.176 \times 10^6$ |
|               |        |                                  |         | $\beta_{xzz}$                   | $-3.860 \times 10^3$ | $\gamma$ (esu) $\times 10^{-36}$ | 1096                |
|               |        |                                  |         | $\beta_{yzz}$                   | $2.426 \times 10^2$  |                                  |                     |
|               |        |                                  |         | $\beta_{zzz}$                   | $2.772 \times 10^4$  |                                  |                     |
|               |        |                                  |         | $\beta_{tot}$                   | $3.199 \times 10^4$  |                                  |                     |
|               |        |                                  |         | $\beta$ (esu) $\times 10^{-30}$ | 276.4                |                                  |                     |

**Table S48.** Components of the dipole moment (Debye), linear polarizability ( $\alpha$ ), first hyperpolarizability ( $\beta$ ), and second hyperpolarizability ( $\gamma$ ) in a.u., and total values for  $\alpha$ ,  $\beta$ , and  $\gamma$  in a.u. and esu calculated at the DFT level [PBE0//cc-pVDZ/LANL08(f)] for complex **4** in its input orientation (see below) in DMF (SCRF IEF-PCM).

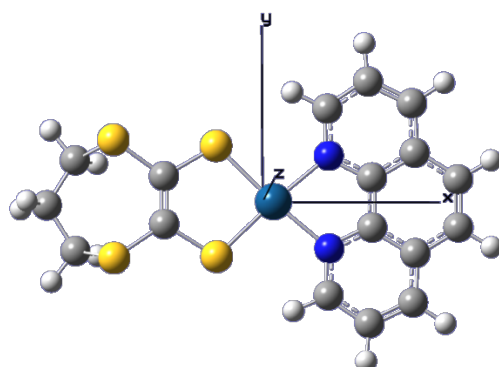

| Dipole moment |        | Linear polarizability            |         | First hyperpolarizability       |                         | Second hyperpolarizability       |                      |
|---------------|--------|----------------------------------|---------|---------------------------------|-------------------------|----------------------------------|----------------------|
| $\mu_x$       | 15.603 | $\alpha_{xx}$                    | 730.684 | $\beta_{xxx}$                   | $2.526 \times 10^4$     | $\gamma_{xxxx}$                  | $6.949 \times 10^6$  |
| $\mu_y$       | 0.000  | $\alpha_{yy}$                    | 548.965 | $\beta_{xxy}$                   | $-2.712 \times 10^{-1}$ | $\gamma_{yyyy}$                  | $2.657 \times 10^5$  |
| $\mu_z$       | -3.900 | $\alpha_{zz}$                    | 220.782 | $\beta_{xyy}$                   | $3.087 \times 10^3$     | $\gamma_{zzzz}$                  | $2.417 \times 10^4$  |
| $\mu_{tot}$   | 16.083 | $\alpha_{tot}$                   | 500.144 | $\beta_{yyy}$                   | $-3.322 \times 10^{-2}$ | $\gamma_{xxyy}$                  | $8.807 \times 10^5$  |
|               |        | $\alpha$ (esu) $\times 10^{-24}$ | 74.021  | $\beta_{xxz}$                   | $-1.139 \times 10^3$    | $\gamma_{yyzz}$                  | $-1.098 \times 10^3$ |
|               |        |                                  |         | $\beta_{xyz}$                   | $1.425 \times 10^{-1}$  | $\gamma_{xxzz}$                  | $-9.125 \times 10^3$ |
|               |        |                                  |         | $\beta_{yyz}$                   | $-1.556 \times 10^2$    | $\gamma_{tot}$                   | $1.796 \times 10^6$  |
|               |        |                                  |         | $\beta_{zzz}$                   | 2.106                   | $\gamma$ (esu) $\times 10^{-36}$ | 904.6                |
|               |        |                                  |         | $\beta_{yzz}$                   | $-2.841 \times 10^{-2}$ |                                  |                      |
|               |        |                                  |         | $\beta_{zzz}$                   | $-1.808 \times 10^2$    |                                  |                      |
|               |        |                                  |         | $\beta_{tot}$                   | $2.838 \times 10^4$     |                                  |                      |
|               |        |                                  |         | $\beta$ (esu) $\times 10^{-30}$ | 245.3                   |                                  |                      |

**Table S49.** Components of the dipole moment (Debye), linear polarizability ( $\alpha$ ), first hyperpolarizability ( $\beta$ ), and second hyperpolarizability ( $\gamma$ ) in a.u., and total values for  $\alpha$ ,  $\beta$ , and  $\gamma$  in a.u. and esu calculated at the DFT level [PBE0//cc-pVDZ/LANL08(f)] for complex **4** in the dipole orientation in DMF (SCRF IEF-PCM).

| Dipole moment |        | Linear polarizability            |         | First hyperpolarizability       |                         | Second hyperpolarizability       |                     |
|---------------|--------|----------------------------------|---------|---------------------------------|-------------------------|----------------------------------|---------------------|
| $\mu_x$       | 0.000  | $\alpha_{xx}$                    | 250.174 | $\beta_{xxx}$                   | 1.562                   | $\gamma_{xxxx}$                  | $3.821 \times 10^4$ |
| $\mu_y$       | 0.000  | $\alpha_{yy}$                    | 548.965 | $\beta_{xxy}$                   | $-7.049 \times 10^{-2}$ | $\gamma_{yyyy}$                  | $2.657 \times 10^5$ |
| $\mu_z$       | 16.083 | $\alpha_{zz}$                    | 701.293 | $\beta_{xyy}$                   | $5.977 \times 10^2$     | $\gamma_{zzzz}$                  | $6.368 \times 10^6$ |
| $\mu_{tot}$   | 16.083 | $\alpha_{tot}$                   | 500.144 | $\beta_{yyy}$                   | $-1.526 \times 10^{-1}$ | $\gamma_{xxyy}$                  | $3.745 \times 10^4$ |
|               |        | $\alpha$ (esu) $\times 10^{-24}$ | 74.021  | $\beta_{xxz}$                   | $9.801 \times 10^2$     | $\gamma_{yyzz}$                  | $8.432 \times 10^5$ |
|               |        |                                  |         | $\beta_{xyz}$                   | $-2.097 \times 10^{-1}$ | $\gamma_{xxzz}$                  | $2.747 \times 10^5$ |
|               |        |                                  |         | $\beta_{yyz}$                   | $3.033 \times 10^3$     | $\gamma_{tot}$                   | $1.796 \times 10^6$ |
|               |        |                                  |         | $\beta_{zzz}$                   | $4.843 \times 10^3$     | $\gamma$ (esu) $\times 10^{-36}$ | 904.8               |
|               |        |                                  |         | $\beta_{yzz}$                   | $-1.387 \times 10^{-2}$ |                                  |                     |
|               |        |                                  |         | $\beta_{zzz}$                   | $2.384 \times 10^4$     |                                  |                     |
|               |        |                                  |         | $\beta_{tot}$                   | $2.838 \times 10^4$     |                                  |                     |
|               |        |                                  |         | $\beta$ (esu) $\times 10^{-30}$ | 245.3                   |                                  |                     |

**Table S50.** Components of the dipole moment (Debye), linear polarizability ( $\alpha$ ), first hyperpolarizability ( $\beta$ ), and second hyperpolarizability ( $\gamma$ ) in a.u., and total values for  $\alpha$ ,  $\beta$ , and  $\gamma$  in a.u. and esu calculated at the DFT level [PBE0//cc-pVDZ/LANL08(f)] for complex **5** in its input orientation (see below) in DMF (SCRF IEF-PCM).

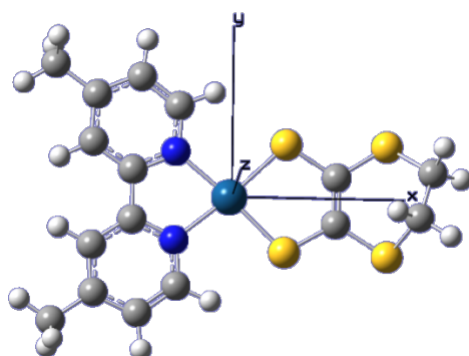

| Dipole moment |         | Linear polarizability            |         | First hyperpolarizability       |                      | Second hyperpolarizability       |                      |
|---------------|---------|----------------------------------|---------|---------------------------------|----------------------|----------------------------------|----------------------|
| $\mu_x$       | -16.916 | $\alpha_{xx}$                    | 699.526 | $\beta_{xxx}$                   | $-2.682 \times 10^4$ | $\gamma_{xxxx}$                  | $8.282 \times 10^6$  |
| $\mu_y$       | -0.008  | $\alpha_{yy}$                    | 521.013 | $\beta_{xxy}$                   | $1.735 \times 10^2$  | $\gamma_{yyyy}$                  | $4.116 \times 10^5$  |
| $\mu_z$       | 2.420   | $\alpha_{zz}$                    | 215.618 | $\beta_{xyy}$                   | $-2.381 \times 10^3$ | $\gamma_{zzzz}$                  | $2.186 \times 10^4$  |
| $\mu_{tot}$   | 17.089  | $\alpha_{tot}$                   | 478.719 | $\beta_{yyy}$                   | $5.828 \times 10^1$  | $\gamma_{xxyy}$                  | $6.844 \times 10^5$  |
|               |         | $\alpha$ (esu) $\times 10^{-24}$ | 70.850  | $\beta_{xxz}$                   | $3.670 \times 10^2$  | $\gamma_{yyzz}$                  | $3.178 \times 10^3$  |
|               |         |                                  |         | $\beta_{xyz}$                   | $-1.478 \times 10^1$ | $\gamma_{xzzz}$                  | $-1.785 \times 10^4$ |
|               |         |                                  |         | $\beta_{yyz}$                   | $2.310 \times 10^1$  | $\gamma_{tot}$                   | $2.011 \times 10^6$  |
|               |         |                                  |         | $\beta_{zzz}$                   | $-7.175 \times 10^1$ | $\gamma$ (esu) $\times 10^{-36}$ | 1013                 |
|               |         |                                  |         | $\beta_{yzz}$                   | $1.877 \times 10^1$  |                                  |                      |
|               |         |                                  |         | $\beta_{zzz}$                   | $1.293 \times 10^2$  |                                  |                      |
|               |         |                                  |         | $\beta_{tot}$                   | $2.928 \times 10^4$  |                                  |                      |
|               |         |                                  |         | $\beta$ (esu) $\times 10^{-30}$ | 253.0                |                                  |                      |

**Table S51.** Components of the dipole moment (Debye), linear polarizability ( $\alpha$ ), first hyperpolarizability ( $\beta$ ), and second hyperpolarizability ( $\gamma$ ) in a.u., and total values for  $\alpha$ ,  $\beta$ , and  $\gamma$  in a.u. and esu calculated at the DFT level [PBE0//cc-pVDZ/LANL08(f)] for complex **5** in the dipole orientation in DMF (SCRF IEF-PCM).

| Dipole moment |        | Linear polarizability            |         | First hyperpolarizability       |                      | Second hyperpolarizability       |                     |
|---------------|--------|----------------------------------|---------|---------------------------------|----------------------|----------------------------------|---------------------|
| $\mu_x$       | 0.000  | $\alpha_{xx}$                    | 226.145 | $\beta_{xxx}$                   | $4.114 \times 10^1$  | $\gamma_{xxxx}$                  | $2.286 \times 10^4$ |
| $\mu_y$       | 0.000  | $\alpha_{yy}$                    | 521.015 | $\beta_{xxy}$                   | $1.825 \times 10^1$  | $\gamma_{yyyy}$                  | $4.116 \times 10^5$ |
| $\mu_z$       | 17.089 | $\alpha_{zz}$                    | 688.997 | $\beta_{xyy}$                   | $-3.144 \times 10^2$ | $\gamma_{zzzz}$                  | $8.006 \times 10^6$ |
| $\mu_{tot}$   | 17.089 | $\alpha_{tot}$                   | 478.719 | $\beta_{yyy}$                   | $6.130 \times 10^1$  | $\gamma_{xxyy}$                  | $1.532 \times 10^4$ |
|               |        | $\alpha$ (esu) $\times 10^{-24}$ | 70.850  | $\beta_{xxz}$                   | $5.165 \times 10^2$  | $\gamma_{yyzz}$                  | $6.731 \times 10^5$ |
|               |        |                                  |         | $\beta_{xyz}$                   | -9.749               | $\gamma_{xzzz}$                  | $1.191 \times 10^5$ |
|               |        |                                  |         | $\beta_{yyz}$                   | $2.360 \times 10^3$  | $\gamma_{tot}$                   | $2.011 \times 10^6$ |
|               |        |                                  |         | $\beta_{zzz}$                   | $-3.359 \times 10^3$ | $\gamma$ (esu) $\times 10^{-36}$ | 1013                |
|               |        |                                  |         | $\beta_{yzz}$                   | $1.835 \times 10^2$  |                                  |                     |
|               |        |                                  |         | $\beta_{zzz}$                   | $2.618 \times 10^4$  |                                  |                     |
|               |        |                                  |         | $\beta_{tot}$                   | $2.928 \times 10^4$  |                                  |                     |
|               |        |                                  |         | $\beta$ (esu) $\times 10^{-30}$ | 253.0                |                                  |                     |

**Table S52.** Components of the dipole moment (Debye), linear polarizability ( $\alpha$ ), first hyperpolarizability ( $\beta$ ), and second hyperpolarizability ( $\gamma$ ) in a.u., and total values for  $\alpha$ ,  $\beta$ , and  $\gamma$  in a.u. and esu calculated at the DFT level [PBE0//cc-pVDZ/LANL08(f)] for complex **6** in its input orientation (see below) in DMF (SCRF IEF-PCM).

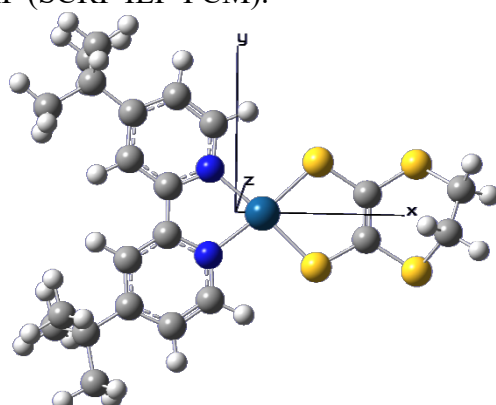

| Dipole moment |         | Linear polarizability            |         | First hyperpolarizability       |                      | Second hyperpolarizability       |                      |
|---------------|---------|----------------------------------|---------|---------------------------------|----------------------|----------------------------------|----------------------|
| $\mu_x$       | -17.554 | $\alpha_{xx}$                    | 800.015 | $\beta_{xxx}$                   | $-2.654 \times 10^4$ | $\gamma_{xxxx}$                  | $8.262 \times 10^6$  |
| $\mu_y$       | -0.036  | $\alpha_{yy}$                    | 612.318 | $\beta_{xxy}$                   | $3.664 \times 10^2$  | $\gamma_{yyyy}$                  | $4.586 \times 10^5$  |
| $\mu_z$       | 2.359   | $\alpha_{zz}$                    | 306.518 | $\beta_{xyy}$                   | $-2.538 \times 10^3$ | $\gamma_{zzzz}$                  | $4.100 \times 10^4$  |
| $\mu_{tot}$   | 17.711  | $\alpha_{tot}$                   | 572.950 | $\beta_{yyy}$                   | $9.690 \times 10^1$  | $\gamma_{xxyy}$                  | $7.417 \times 10^5$  |
|               |         | $\alpha$ (esu) $\times 10^{-24}$ | 84.797  | $\beta_{xxz}$                   | $2.577 \times 10^2$  | $\gamma_{yyzz}$                  | $1.055 \times 10^4$  |
|               |         |                                  |         | $\beta_{xyz}$                   | $-3.275 \times 10^1$ | $\gamma_{xxzz}$                  | $-3.845 \times 10^3$ |
|               |         |                                  |         | $\beta_{yyz}$                   | $1.696 \times 10^1$  | $\gamma_{tot}$                   | $2.052 \times 10^6$  |
|               |         |                                  |         | $\beta_{xzz}$                   | $-5.817 \times 10^1$ | $\gamma$ (esu) $\times 10^{-36}$ | 1033                 |
|               |         |                                  |         | $\beta_{yzz}$                   | $-1.185 \times 10^2$ |                                  |                      |
|               |         |                                  |         | $\beta_{zzz}$                   | $1.221 \times 10^2$  |                                  |                      |
|               |         |                                  |         | $\beta_{tot}$                   | $2.914 \times 10^4$  |                                  |                      |
|               |         |                                  |         | $\beta$ (esu) $\times 10^{-30}$ | 251.8                |                                  |                      |

**Table S53.** Components of the dipole moment (Debye), linear polarizability ( $\alpha$ ), first hyperpolarizability ( $\beta$ ), and second hyperpolarizability ( $\gamma$ ) in a.u., and total values for  $\alpha$ ,  $\beta$ , and  $\gamma$  in a.u. and esu calculated at the DFT level [PBE0//cc-pVDZ/LANL08(f)] for complex **6** in the dipole orientation in DMF (SCRF IEF-PCM).

| Dipole moment |        | Linear polarizability            |         | First hyperpolarizability       |                      | Second hyperpolarizability       |                     |
|---------------|--------|----------------------------------|---------|---------------------------------|----------------------|----------------------------------|---------------------|
| $\mu_x$       | 0.000  | $\alpha_{xx}$                    | 316.627 | $\beta_{xxx}$                   | $4.750 \times 10^1$  | $\gamma_{xxxx}$                  | $4.254 \times 10^4$ |
| $\mu_y$       | 0.000  | $\alpha_{yy}$                    | 612.332 | $\beta_{xxy}$                   | $-1.164 \times 10^2$ | $\gamma_{yyyy}$                  | $4.587 \times 10^5$ |
| $\mu_z$       | 17.712 | $\alpha_{zz}$                    | 789.892 | $\beta_{xyy}$                   | $-3.221 \times 10^2$ | $\gamma_{zzzz}$                  | $8.004 \times 10^6$ |
| $\mu_{tot}$   | 17.712 | $\alpha_{tot}$                   | 572.950 | $\beta_{yyy}$                   | $1.106 \times 10^2$  | $\gamma_{xxyy}$                  | $2.279 \times 10^4$ |
|               |        | $\alpha$ (esu) $\times 10^{-24}$ | 84.797  | $\beta_{xxz}$                   | $4.709 \times 10^2$  | $\gamma_{yyzz}$                  | $7.305 \times 10^5$ |
|               |        |                                  |         | $\beta_{xyz}$                   | $-4.201 \times 10^1$ | $\gamma_{xxzz}$                  | $1.240 \times 10^5$ |
|               |        |                                  |         | $\beta_{yyz}$                   | $2.519 \times 10^3$  | $\gamma_{tot}$                   | $2.052 \times 10^6$ |
|               |        |                                  |         | $\beta_{xzz}$                   | $-3.214 \times 10^3$ | $\gamma$ (esu) $\times 10^{-36}$ | 1034                |
|               |        |                                  |         | $\beta_{yzz}$                   | $4.034 \times 10^2$  |                                  |                     |
|               |        |                                  |         | $\beta_{zzz}$                   | $2.594 \times 10^4$  |                                  |                     |
|               |        |                                  |         | $\beta_{tot}$                   | $2.914 \times 10^4$  |                                  |                     |
|               |        |                                  |         | $\beta$ (esu) $\times 10^{-30}$ | 251.8                |                                  |                     |



**Table S54.** Second hyperpolarizabilities of 1,2-dithiolene complexes obtained at 532 nm excitation wavelength under picosecond or nanosecond laser pulses by using the Z-scan or degenerate four-wave mixing (DFWM) techniques.

| Complex                                                                             | Experimental technique | Laser pulses | Solvent         | $\gamma$ ( $\times 10^{-29}$ esu) | Ref. |
|-------------------------------------------------------------------------------------|------------------------|--------------|-----------------|-----------------------------------|------|
| 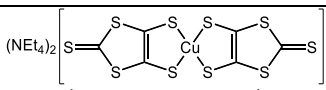   | Z-scan                 | 28 ps        | Acetone         | 0.0517                            | 1    |
|    | Z-scan                 | 4 ns         | CS <sub>2</sub> | 0.55                              | 2    |
|    | Z-scan                 | 8 ns         | CS <sub>2</sub> | 3.7                               | 3    |
|                                                                                     | Z-scan                 | 40 ps        | DMF             | 0.014                             | 4    |
|    | Z-scan                 | 8 ns         | CS <sub>2</sub> | 6.3                               | 3    |
|                                                                                     | Z-scan                 | 40 ps        | CS <sub>2</sub> | 0.045                             | 4    |
|   | Z-scan                 | 8 ns         | CS <sub>2</sub> | 1.4                               | 3    |
|                                                                                     | Z-scan                 | 40 ps        | DMF             | 0.0024                            | 4    |
|   | Z-scan                 | 200 ps       | –               | 0.71                              | 5    |
|  | Z-scan                 | 200 ps       | –               | 0.81                              | 5    |
|  | Z-scan                 | 8 ns         | CS <sub>2</sub> | 3.5                               | 6    |
|  | Z-scan                 | 8 ns         | CS <sub>2</sub> | 3.8                               | 6    |
|  | Z-scan                 | 8 ns         | CS <sub>2</sub> | 3.6                               | 6    |
|  | Z-scan                 | 8 ns         | CS <sub>2</sub> | 2.2                               | 6    |
|  | Z-scan                 | 8 ns         | CS <sub>2</sub> | 2.6                               | 6    |
|  | Z-scan                 | 8 ns         | CS <sub>2</sub> | 2.3                               | 7    |
|  | Z-scan                 | 8 ns         | CS <sub>2</sub> | 3.7                               | 7    |
|  | DFWM                   | 15 ps        | Acetone         | 0.263                             | 8    |
|  | DFWM                   | 15 ps        | Acetone         | 0.280                             | 8    |

## 2. Schemes and Figures

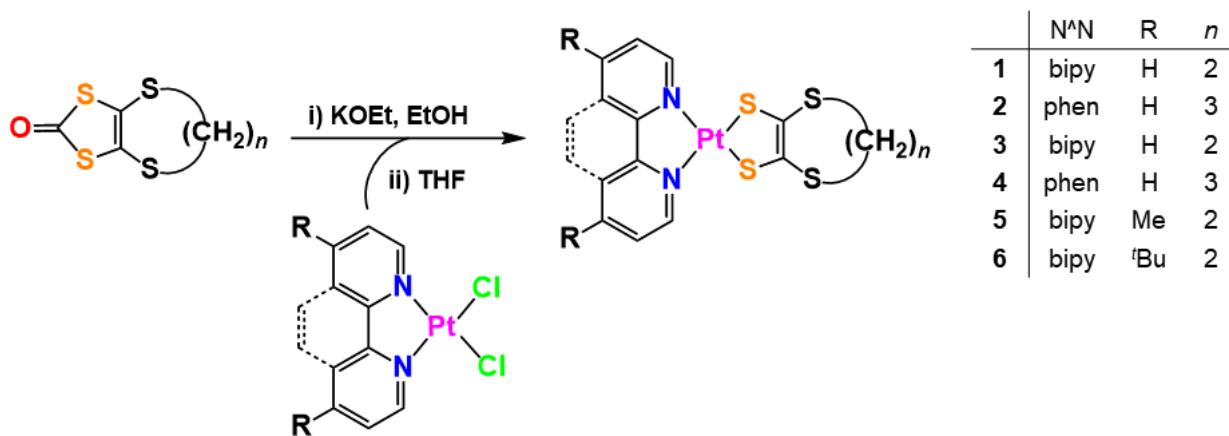

**Scheme S1.** Synthetic route for the preparation of compounds **1–6**.

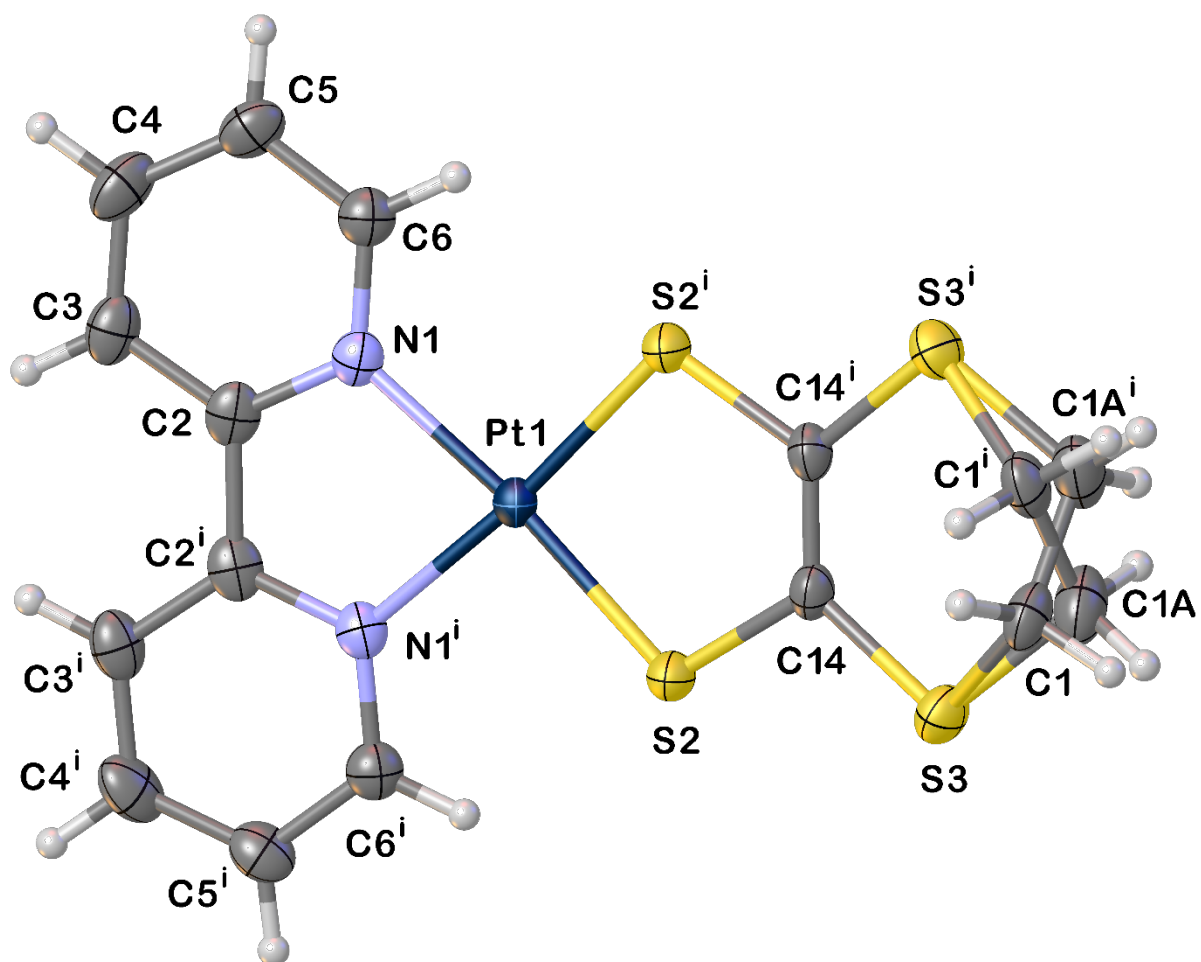

**Figure S1.** Drawing and atom labeling scheme for complex **1**, showing the disorder on the terminal carbons of the dddt<sup>2-</sup> 1,2-dithiolene ligand modelled over two positions.  $i$ :  $+x, 3/2-y, +z$ .

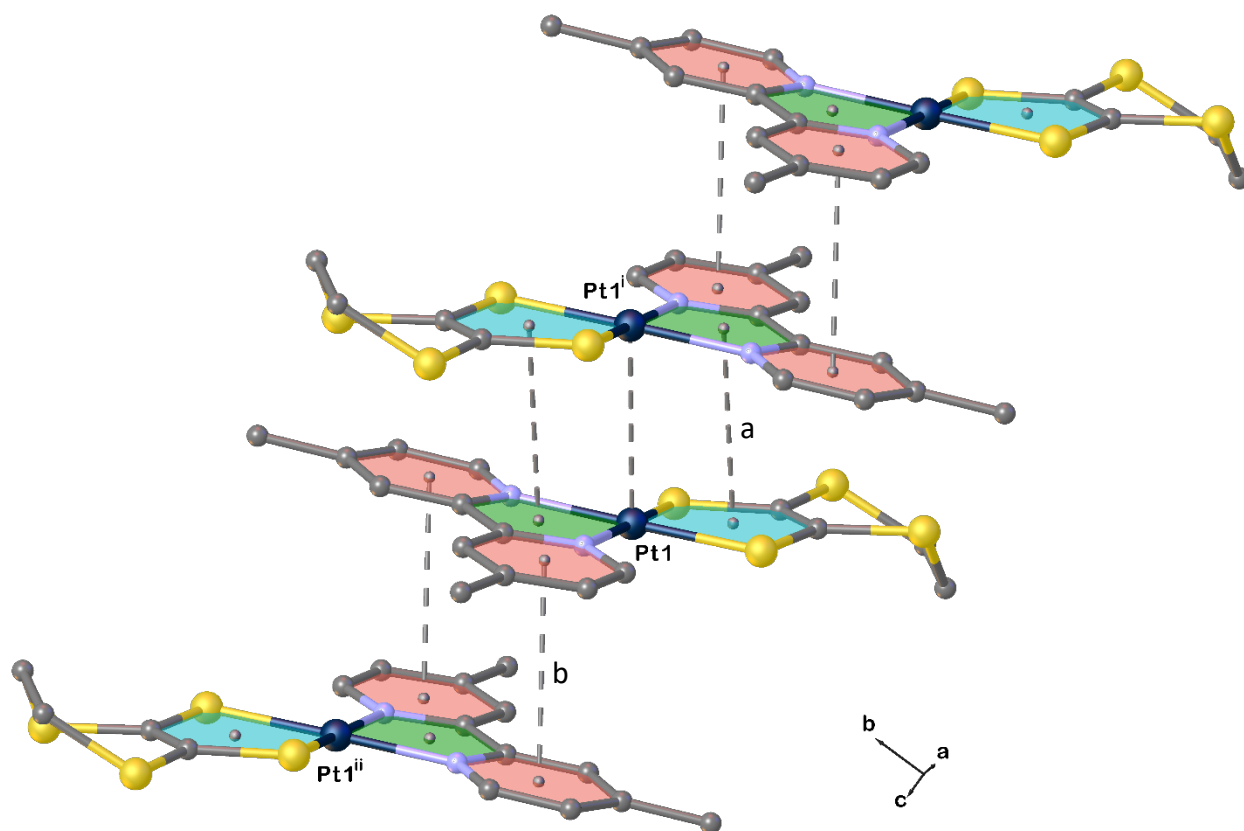

**Figure S2.** Perspective drawing of the interacting symmetry-related molecular units in the crystal structure of complex **5**. Intercentroid distance (a) 3.74; (b) 3.64 Å; Pt···Pt<sup>i</sup> distance 3.77 Å. Hydrogen atoms have been omitted for clarity. Symmetry operations: <sup>i</sup> = 1-x, 1-y, 1-z; <sup>ii</sup> = x, y, -1+z.

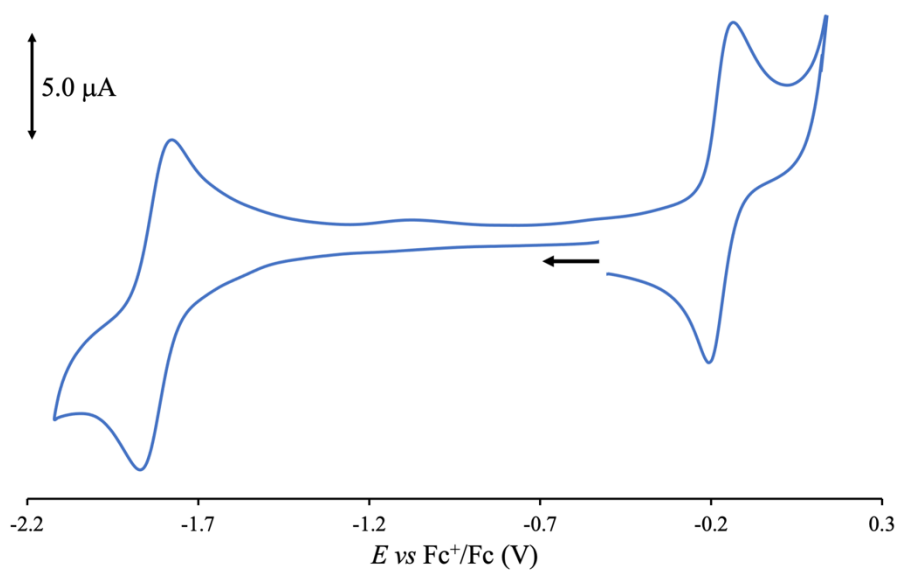

**Figure S3.** Cyclic voltammogram recorded for an anhydrous DMSO solution of complex **5** (298 K; scan rate  $100 \text{ mV s}^{-1}$ ;  $0.1 \text{ M TBAPF}_6$ ).

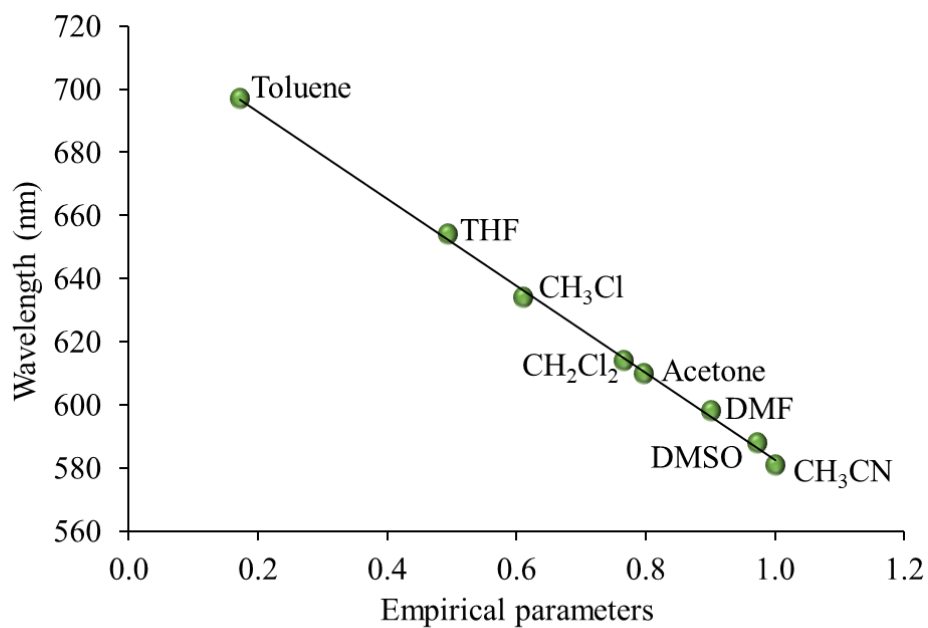

**Figure S4.** Correlation between Eisenberg empirical parameters<sup>9</sup> and experimentally measured  $\lambda_{\max}$  visible absorption maxima recorded for complex **3** in eight solvents ( $R^2 = 0.998$ ).

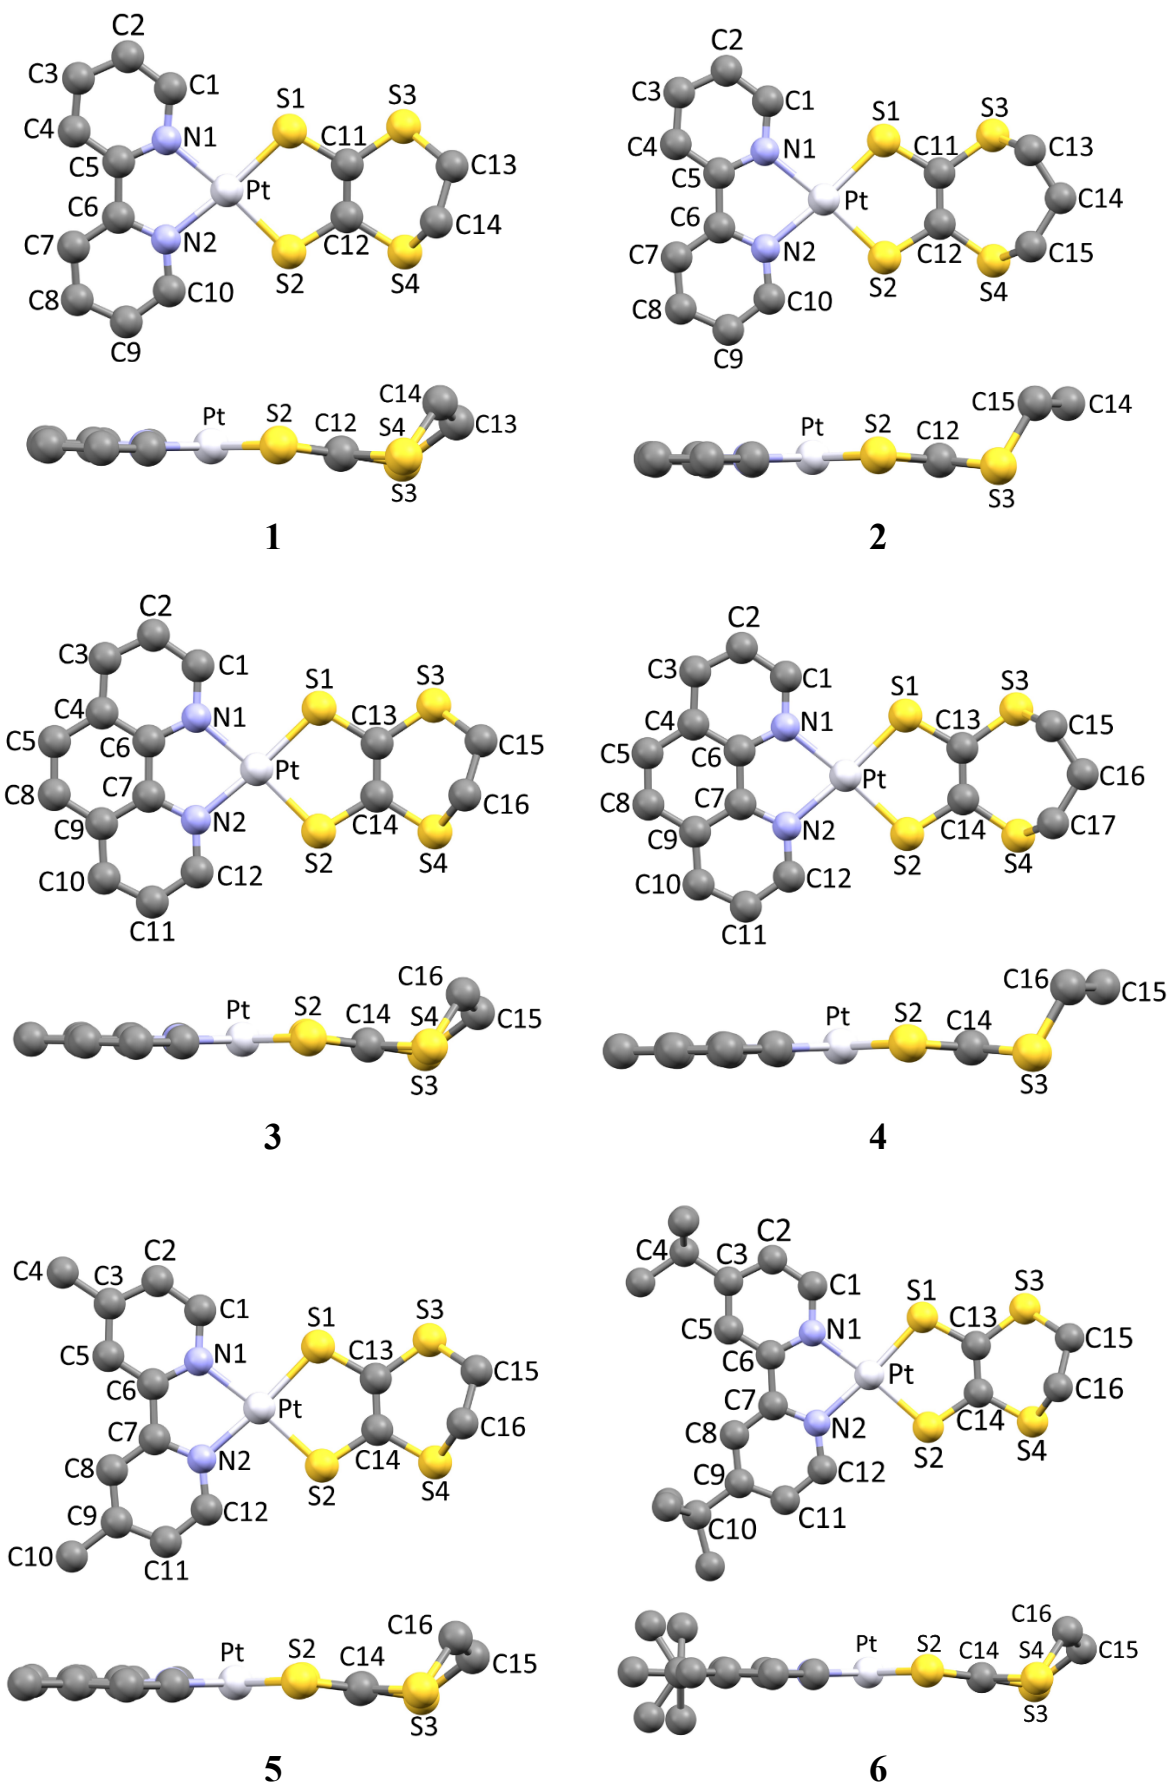

**Figure S5.** Different perspectives of the geometries optimised for complexes 1–6 at the DFT level [PBE0//cc-pVDZ/LANL08(f)] in the gas phase. Hydrogen atoms were omitted for clarity.

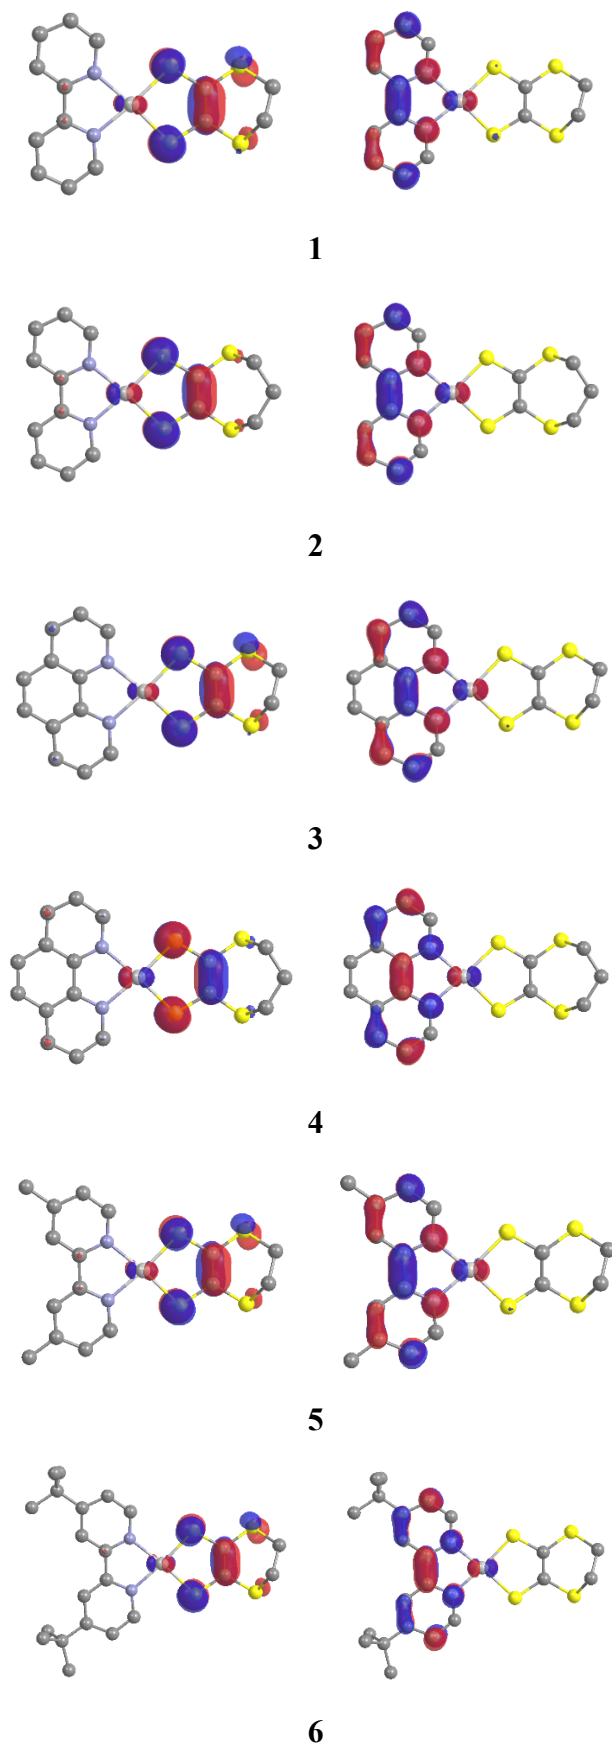

**Figure S6.** KS-HOMO (left) and KS-LUMO (right) calculated for complexes 1–6 at the DFT level [PBE0//cc-pVDZ/LANL08(f)] in the gas phase. Hydrogen atoms were omitted for clarity. Isovalue 0.05 |e|.



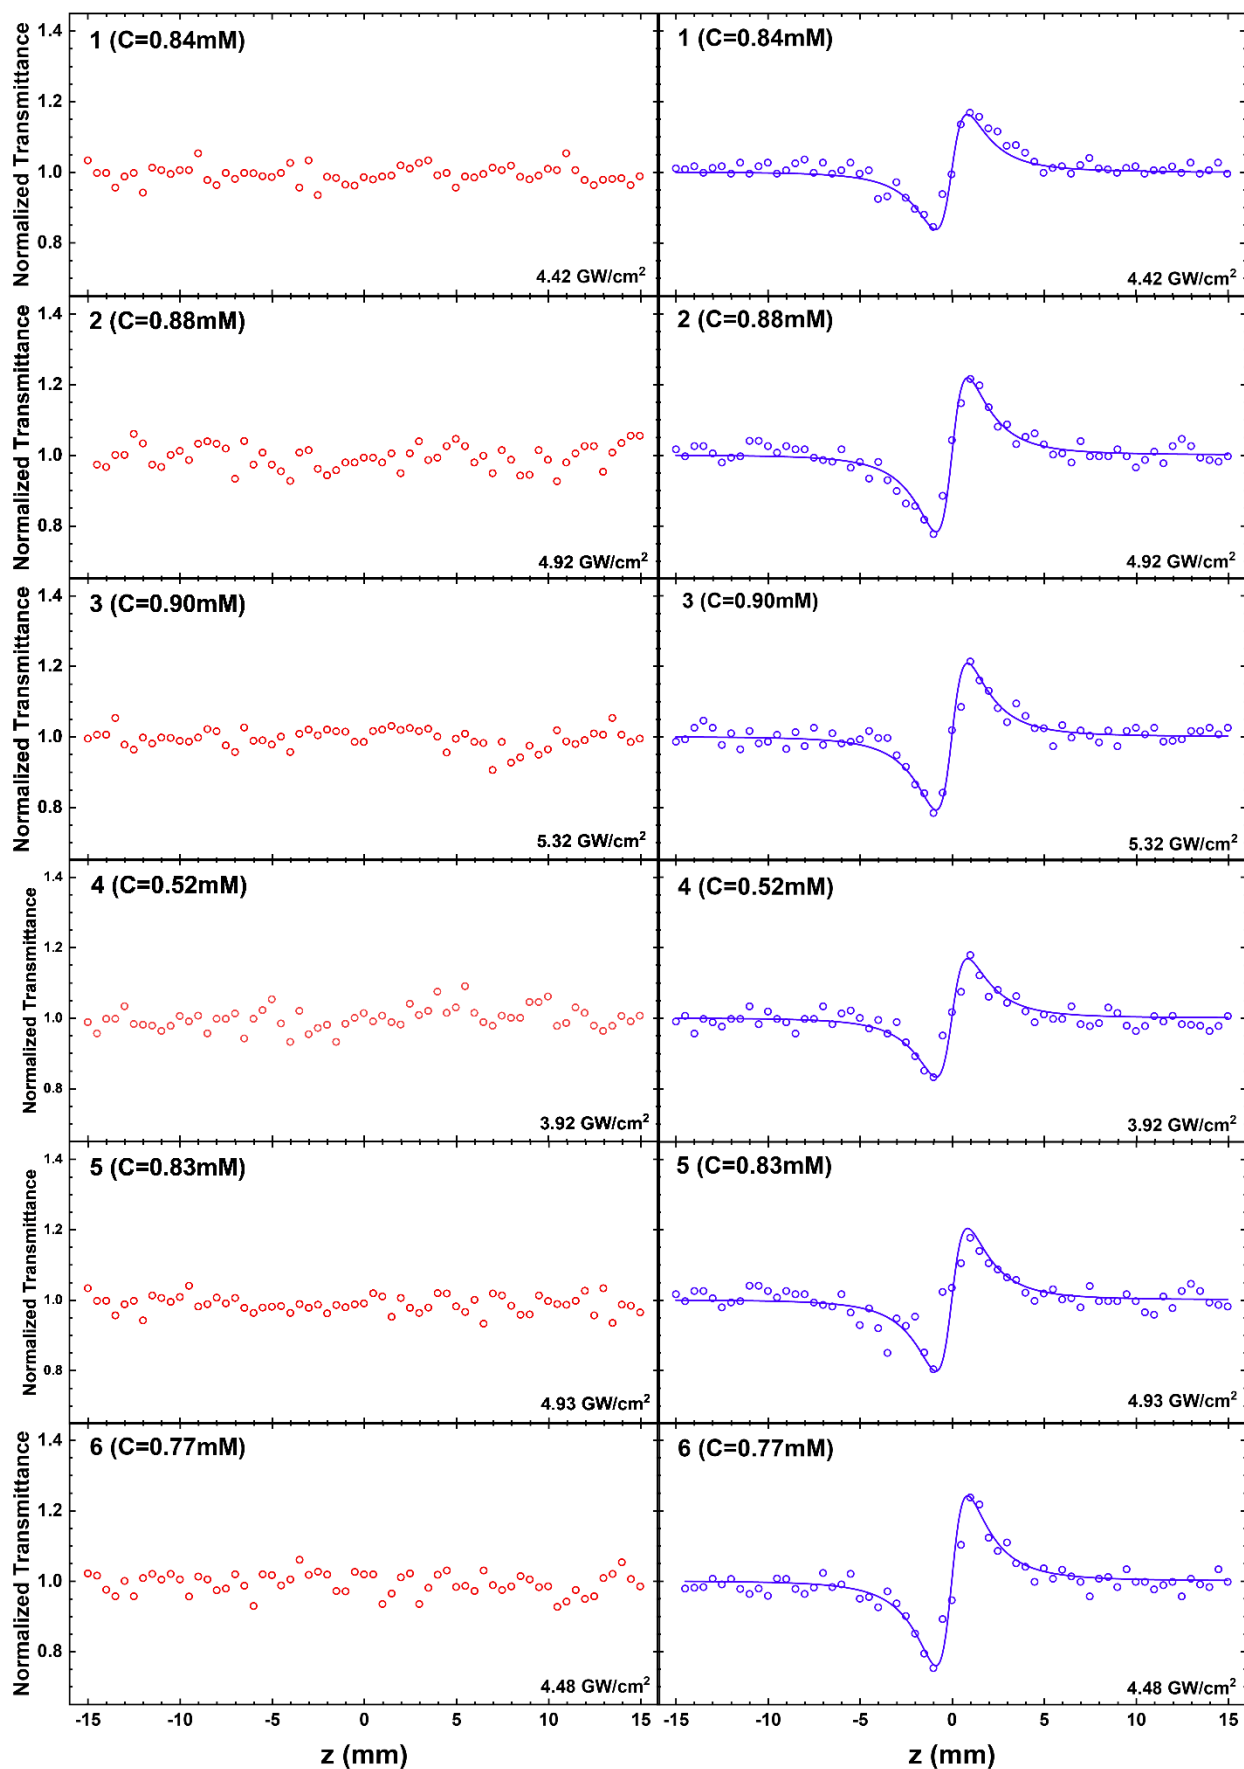

**Figure S7.** "Open-aperture" (left) and "divided" (right) Z-scans of complexes 1–6 obtained from the Z-scan measurements under 35 ps, 532 nm laser excitation.

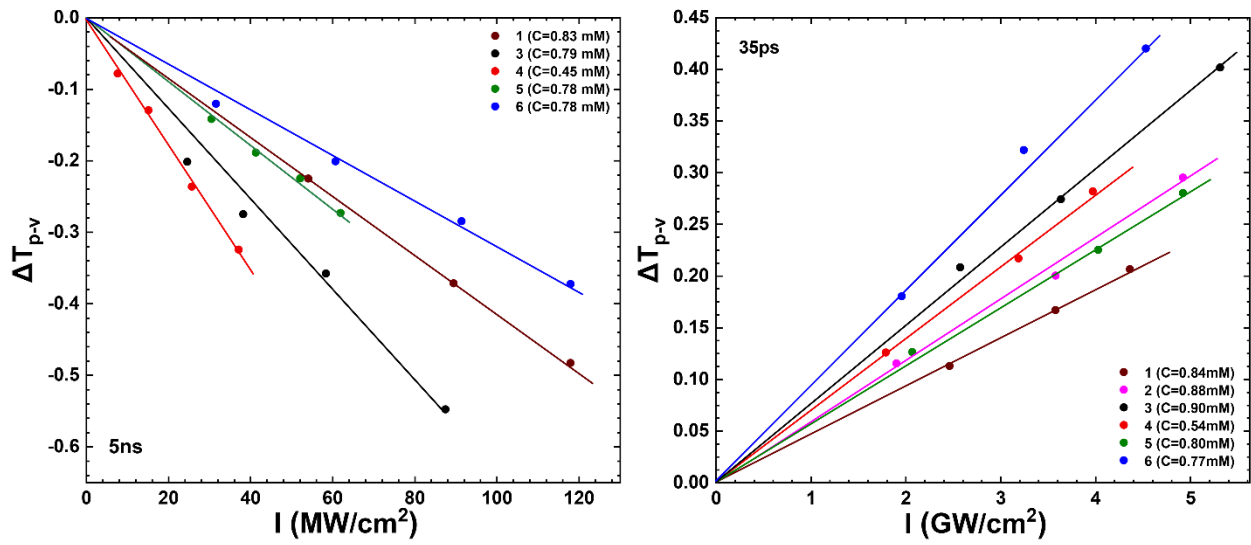

**Figure S8.** Variation of the  $\Delta T_{p-v}$  parameter with the incident laser intensity under 4 ns (left) and 35 ps (right), 532 nm laser excitation conditions.

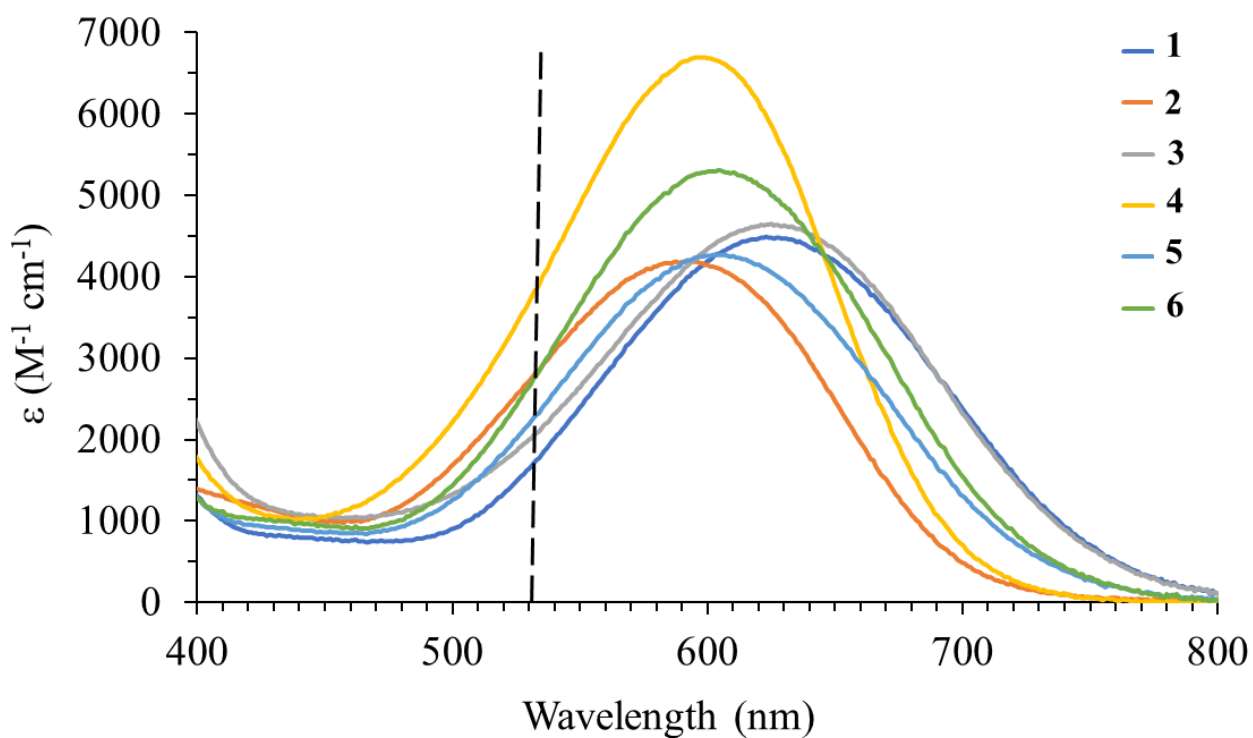

**Figure S9.** Absorption spectra in the visible region (400–800 nm) recorded for complexes **1–6** in DMF; the dotted line at  $\lambda = 532$  nm indicates the laser excitation wavelength; molar extinction coefficients at 532 nm  $\epsilon_{532} = 1700$  (complex **1**), 2800 (**2**), 2100 (**3**), 3800 (**4**), 2300 (**5**), and 2700 (**6**)  $M^{-1} \cdot cm^{-1}$ .

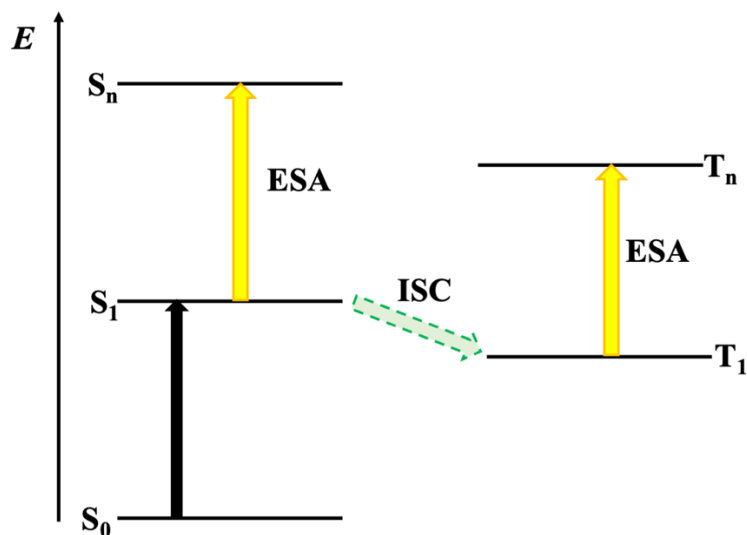

**Figure S10.** Schematic representation of the five-level model<sup>10</sup> for the interpretation of NLO absorption: the initial linear absorption promotes the system from the ground state  $S_0$  to the first singlet excited state  $S_1$ . An intersystem crossing (ISC) to the triplet state  $T_1$  can occur. Nonlinear absorption is observed when further excitations  $S_1 \rightarrow S_n$  and  $T_1 \rightarrow T_n$  take place (excited state absorption, ESA).

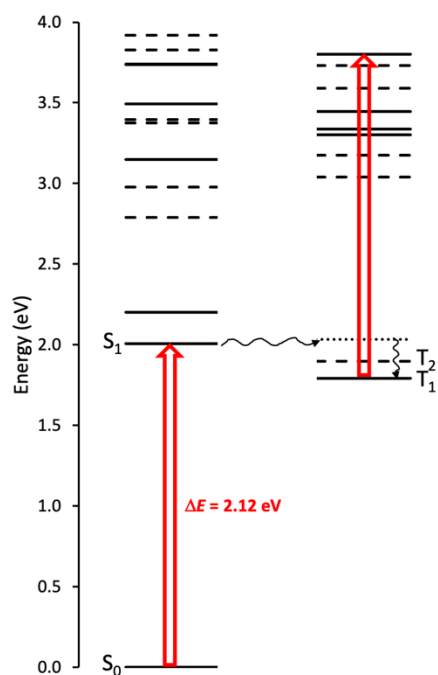

**Figure S11.** Jablonski diagram (0.0–4.0 eV) calculated for complex **4** at TD-DFT level [PBE0//cc-pVDZ/LANL08(f)] in DMF (SCRF IEF-PCM). Excited states calculated for the  $S_0 \rightarrow S_n$  and  $T_1 \rightarrow T_n$  transitions with oscillator strength values  $f < 0.05$  are represented as dashed lines. Red arrows represent energy gaps corresponding to the  $S_0 \rightarrow S_1$  transition; wavy arrows correspond to the internal conversion of  $S_1$ , ISC between  $S_1$  and the triplet state optimised at the same geometry (dotted line), and the internal conversion leading from the former to **T**.

### 3. References

- 1 X. Q. Wang, Q. Ren, F. J. Zhang, W. F. Guo, X. B. Sun, J. Sun, H. L. Yang, G. H. Zhang, X. Q. Hou and D. Xu, *Mater. Res. Bull.*, 2008, **43**, 2342–2353.
- 2 G. Chatzikyriakos, I. Papagiannouli, S. Couris, G. C. Anyfantis and G. C. Papavassiliou, *Chem. Phys. Lett.*, 2011, **513**, 229–235.
- 3 P. Aloukos, G. Chatzikyriakos, I. Papagiannouli, N. Liaros and S. Couris, *Chem. Phys. Lett.*, 2010, **495**, 245–250.
- 4 G. Soras, N. Psaroudakis, G. A. Mousdis, M. J. Manos, A. J. Tasiopoulos, P. Aloukos, S. Couris, P. Labéguerie, J. Lipinski, A. Avramopoulos and M. G. Papadopoulos, *Chem. Phys.*, 2010, **372**, 33–45.
- 5 J.-L. Zuo, T.-M. Yao, F. You, X.-Z. You, H.-K. Funb and B.-C. Yipb, *J. Mater. Chem.*, 1996, **6**, 1633–1637.
- 6 P. Aloukos, S. Couris, J. B. Koutselas, G. C. Anyfantis and G. C. Papavassiliou, *Chem. Phys. Lett.*, 2006, **428**, 109–113.
- 7 G. C. Anyfantis, G. C. Papavassiliou, P. Aloukos, S. Couris, Y. F. Weng, H. Yoshino and K. Murata, *Zeitschrift für Naturforsch. B*, 2007, **62**, 200–204.
- 8 J. Dai, G. Q. Bian, X. Wang, Q. F. Xu, M. Y. Zhou, M. Munakata, M. Maekawa, M. H. Tong, Z. R. Sun and H. P. Zeng, *J. Am. Chem. Soc.*, 2000, **122**, 11007–11008.
- 9 S. D. Cummings and R. Eisenberg, *J. Am. Chem. Soc.*, 1996, **118**, 1949–1960.
- 10 B. J. Thompson, *Handbook of nonlinear optics*, Marcel Dekker, Inc., New York, 1996.
